# Supplementary material for: Modulation of the Cytotoxic Properties of Pd(II) Complexes Based on Functionalized Carboxamides Featuring Labile Phosphoryl Coordination Sites
Source: MDPI journal article supplement (doi:10.3390/pharmaceutics15041088), 2023-03-28
Supplement: s1 [file s1]

# **Modulation of the Cytotoxic Properties of Pd(II) Complexes Based on Functionalized Carboxamides Featuring Labile Phosphoryl Coordination Sites**

**Diana V. Aleksanyan, Aleksandr V. Konovalov, Svetlana G. Churusova, Ekaterina Yu. Rybalkin, Alexander S. Peregudov, Svetlana A. Aksenova, Evgenii I. Gutsul, Zinaida S. Klemenkova and Vladimir A. Kozlov**

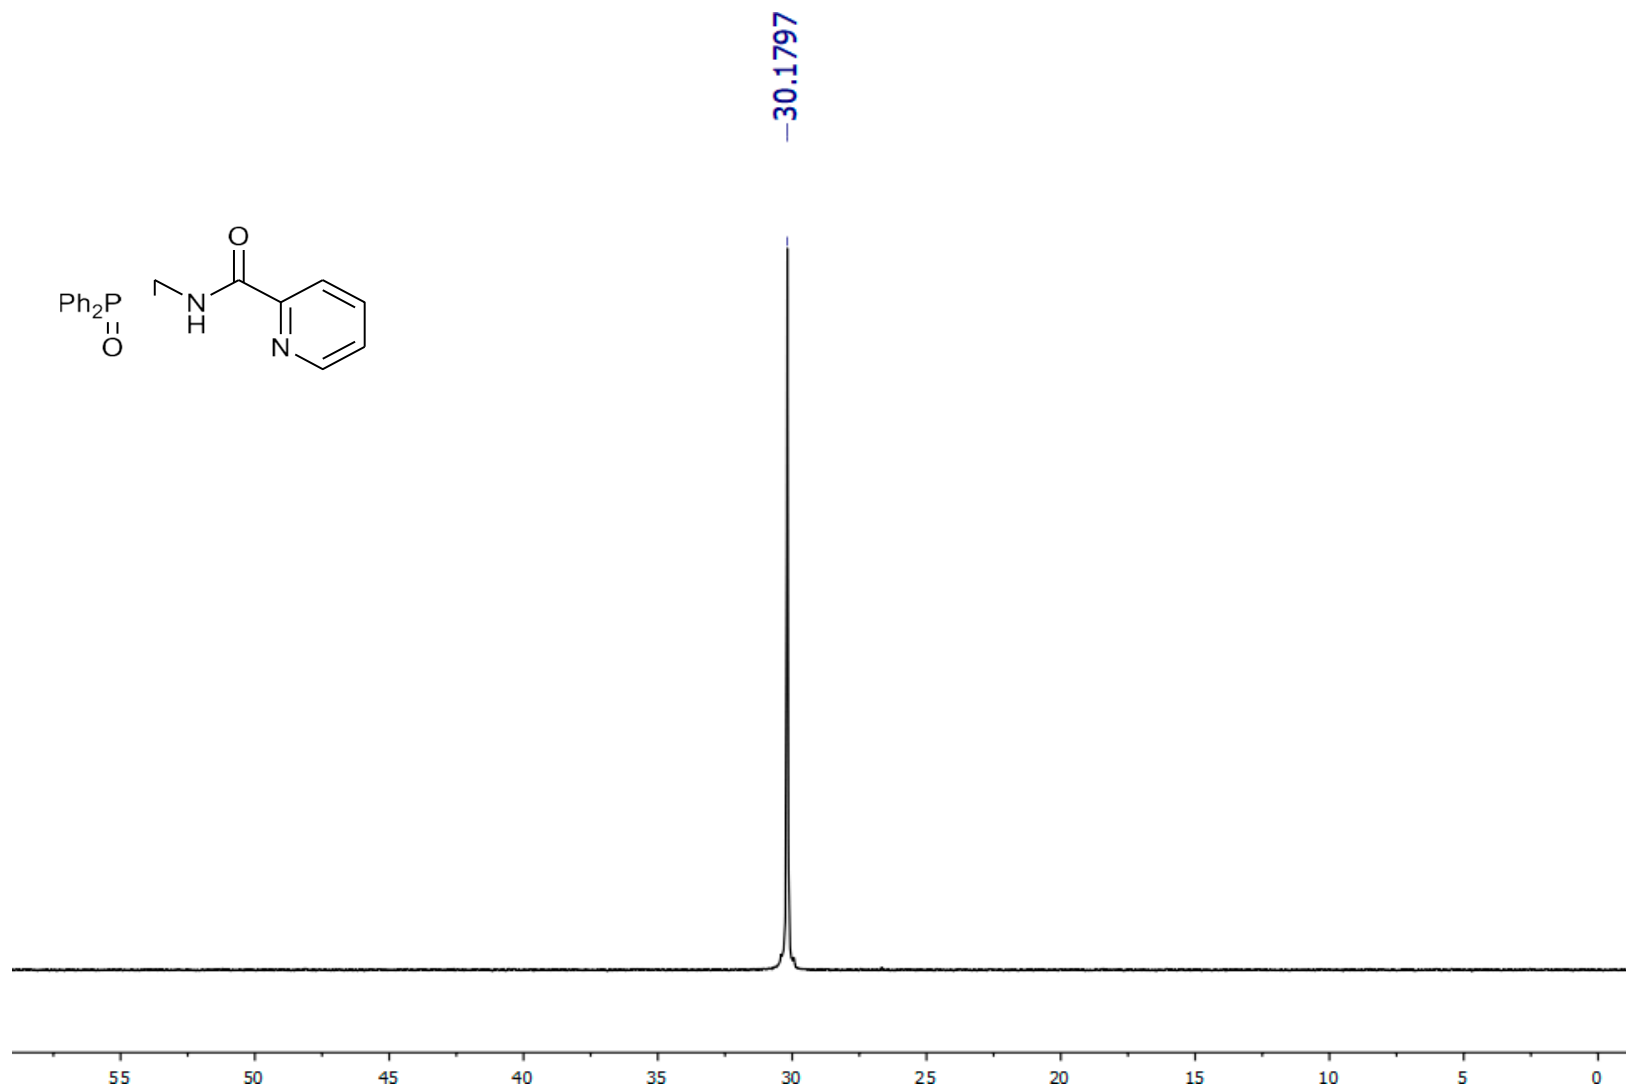

**Figure S1.**  $^{31}\text{P}\{^1\text{H}\}$  NMR spectrum of ligand **1a** (202.45 MHz,  $\text{CDCl}_3$ ).

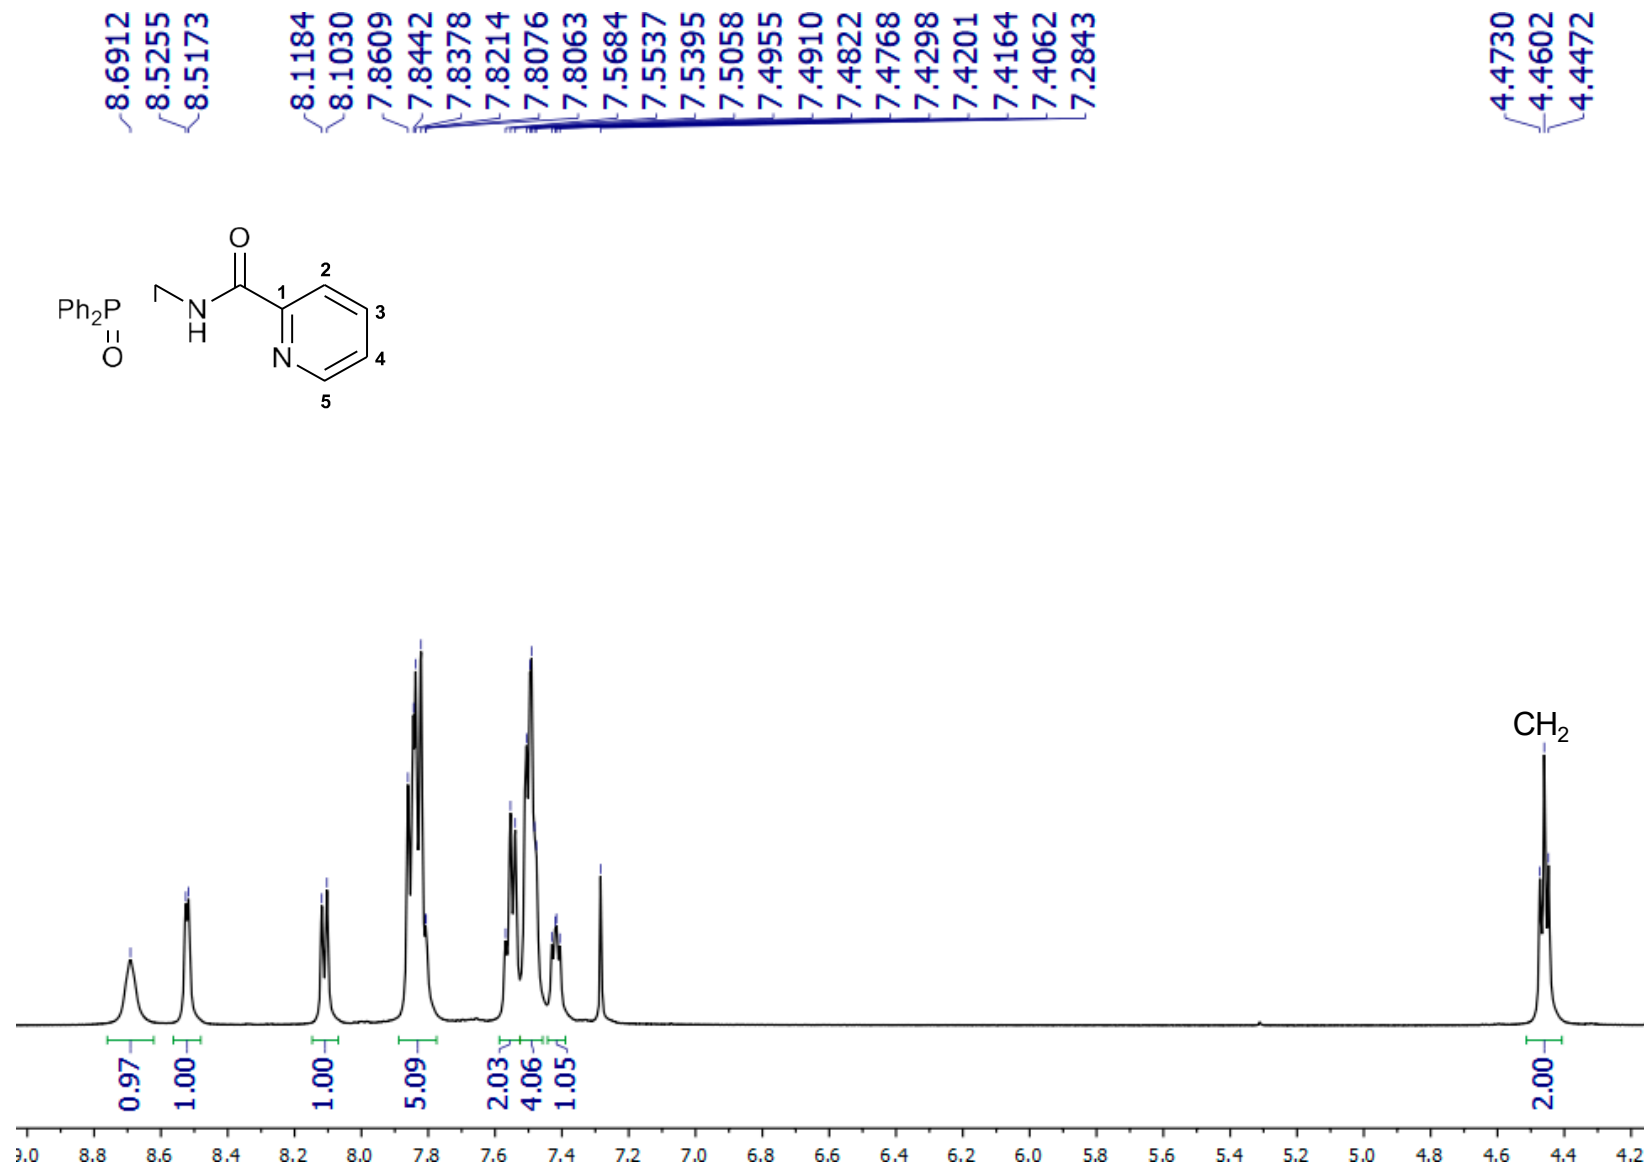

**Figure. S2.** <sup>1</sup>H NMR spectrum of ligand **1a** (500.13 MHz, CDCl<sub>3</sub>)

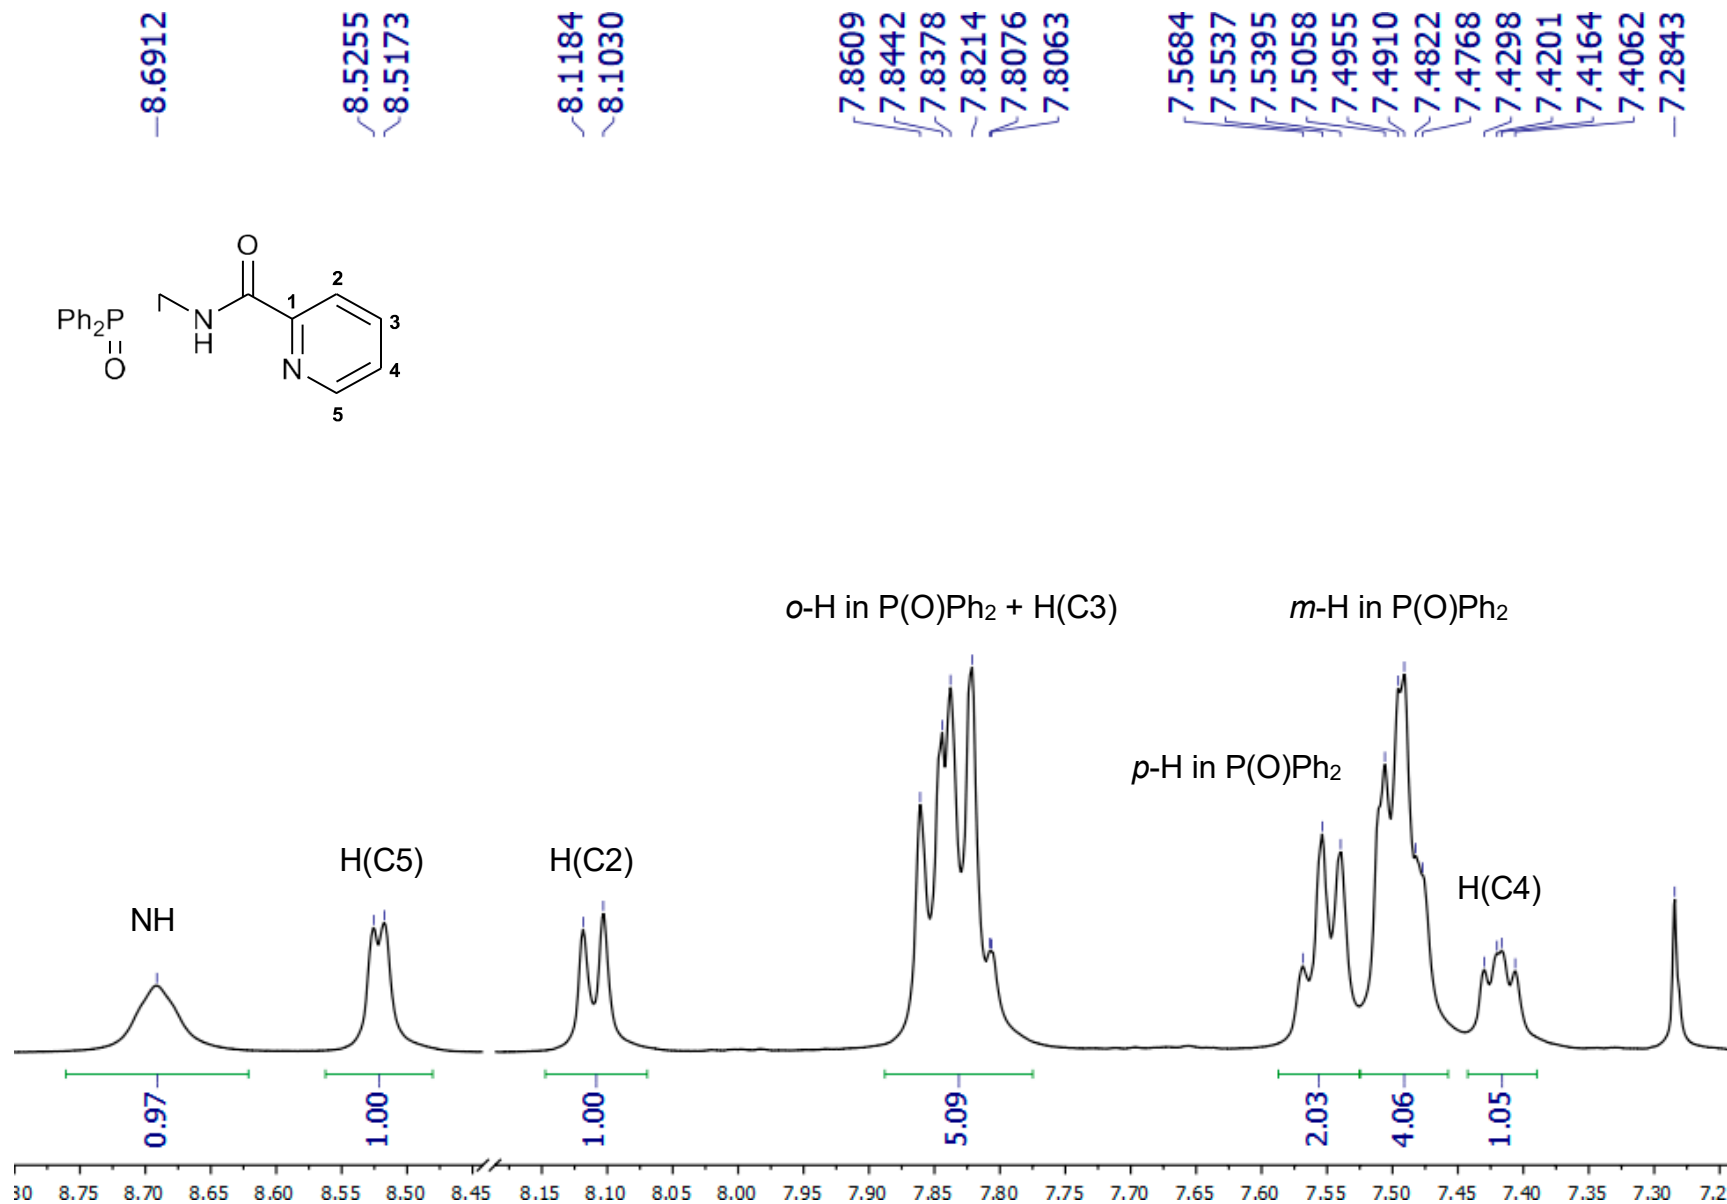

**Figure. S3.** Extended fragments of the  $^1\text{H}$  NMR spectrum of ligand **1a** (500.13 MHz,  $\text{CDCl}_3$ )

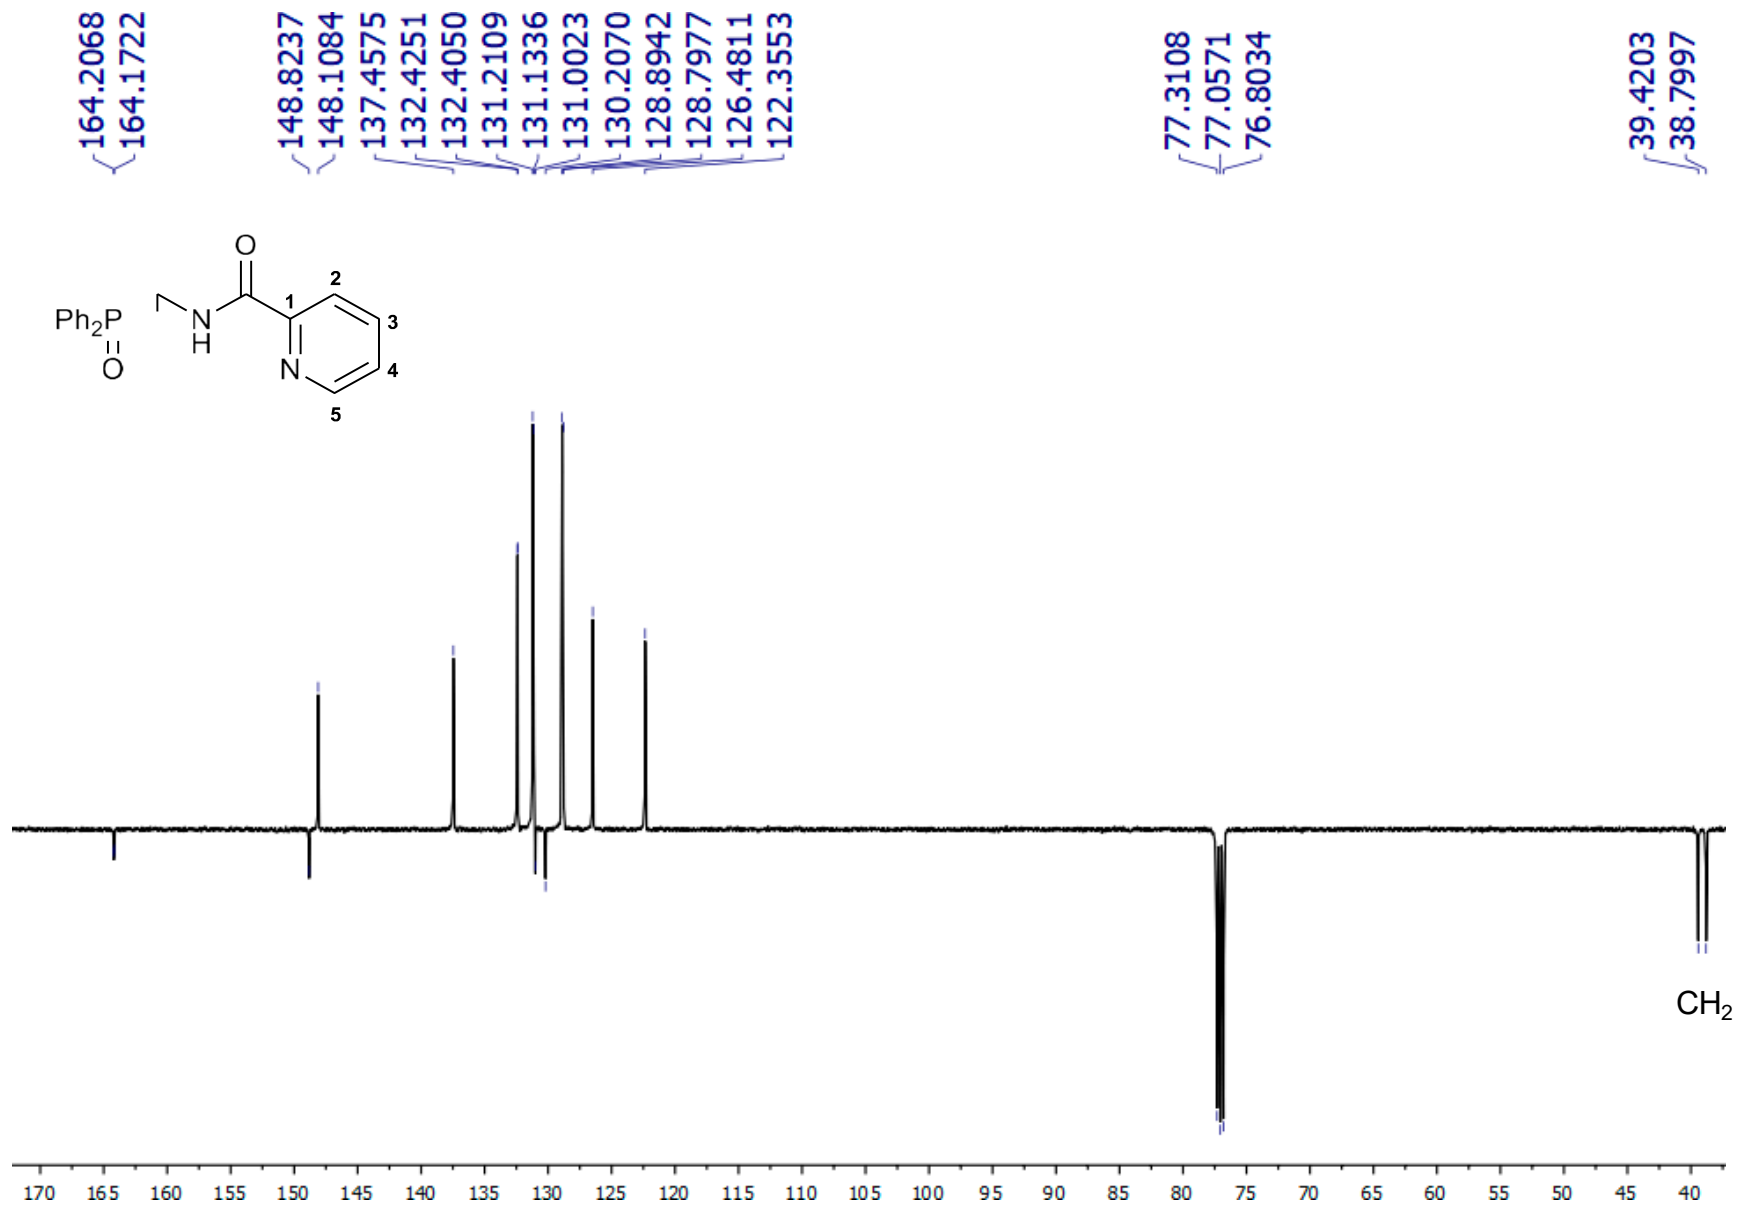

**Figure. S4.**  $^{13}\text{C}\{^1\text{H}\}$  NMR spectrum of ligand **1a** (125.76 MHz,  $\text{CDCl}_3$ )

-148.8237  
-148.1084

-137.4575

132.4251  
132.4050  
131.2109  
131.1336  
131.0023  
130.2070  
128.8942  
128.7977

-126.4811

-122.3553

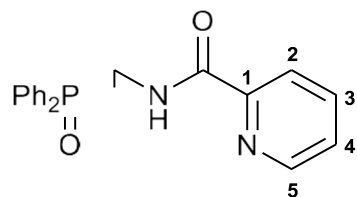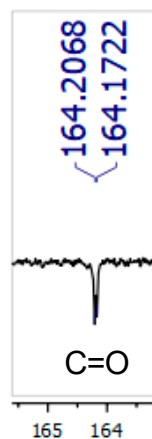

*o*-C in  $\text{P}(\text{O})\text{Ph}_2$

*m*-C in  $\text{P}(\text{O})\text{Ph}_2$

*p*-C in  
 $\text{P}(\text{O})\text{Ph}_2$

C4

C2

C3

C5

C1

*ipso*-C in  $\text{P}(\text{O})\text{Ph}_2$

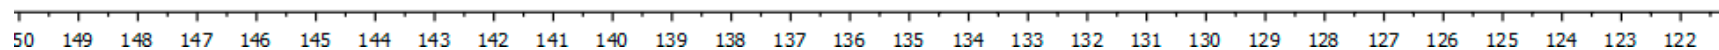

**Figure. S5.** Extended fragments of the  $^{13}\text{C}\{^1\text{H}\}$  NMR spectrum of ligand **1a** (125.76 MHz,  $\text{CDCl}_3$ )

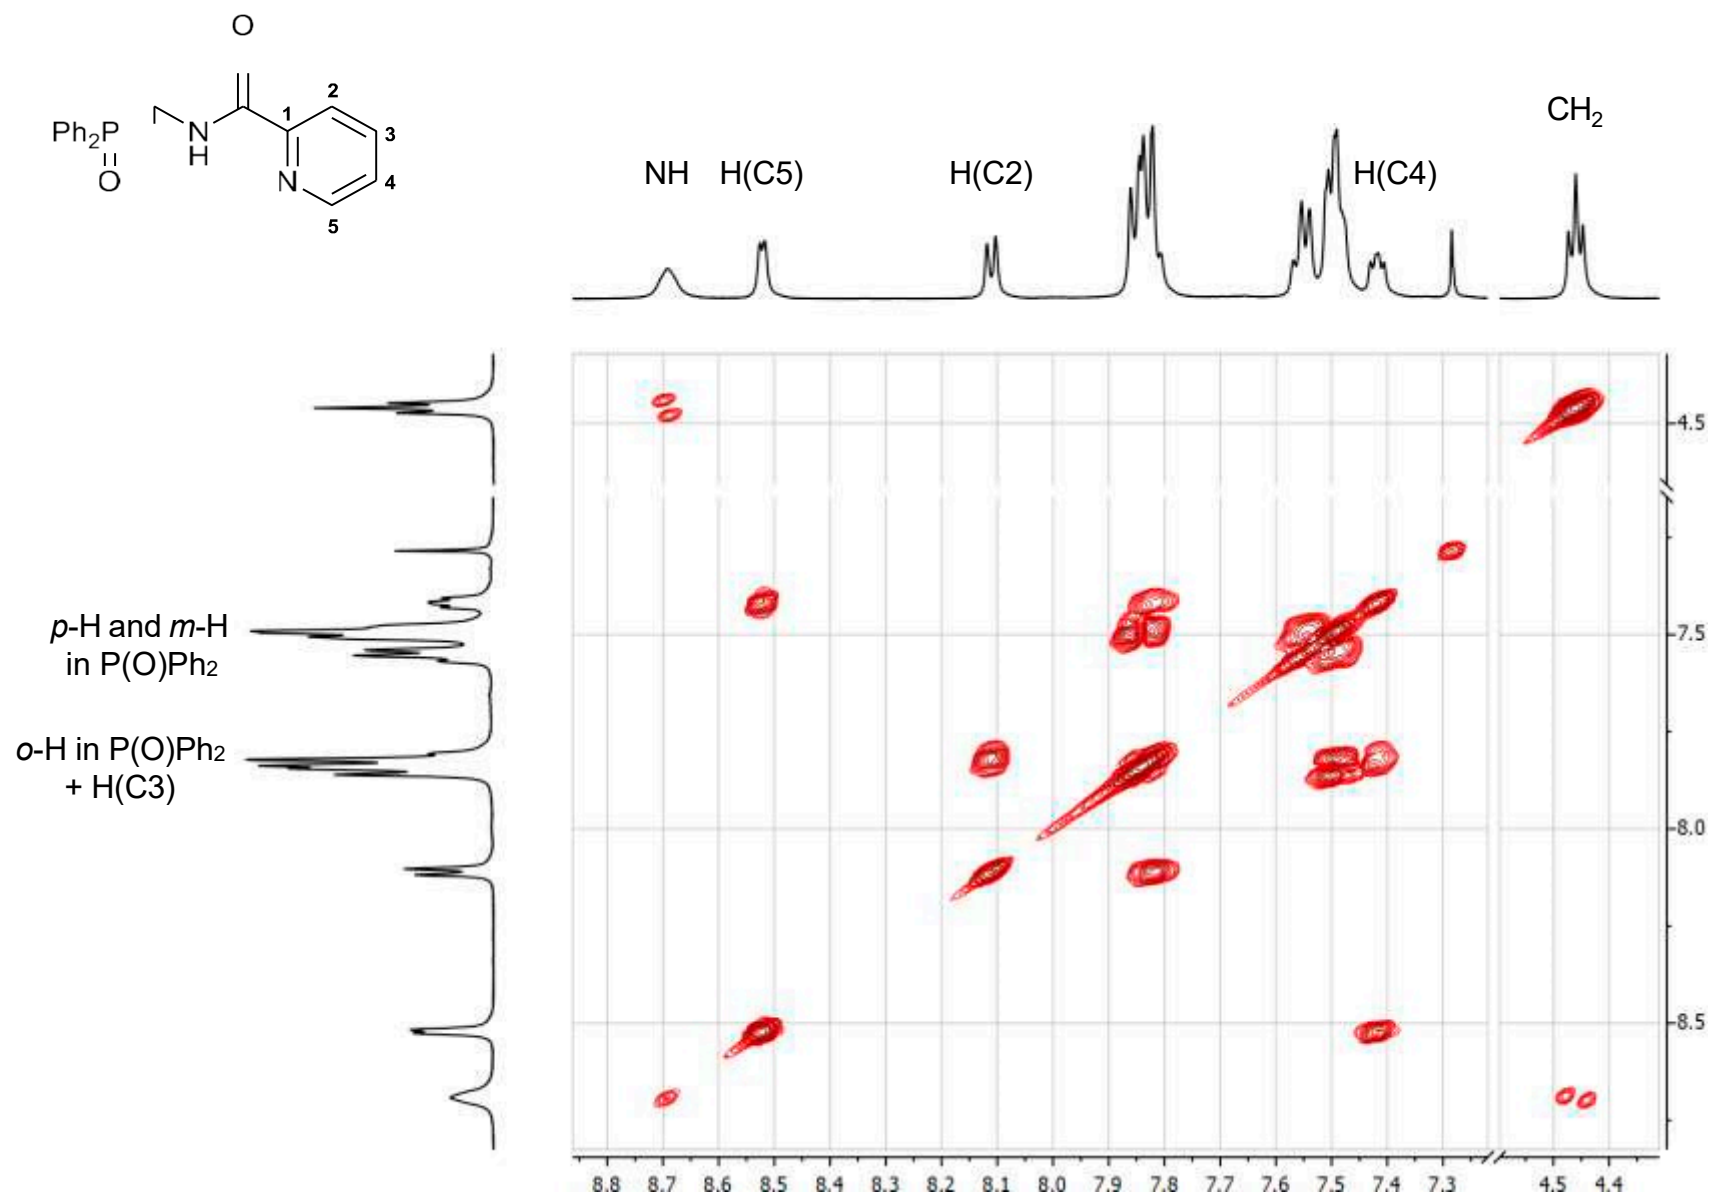

**Figure. S6.** Extended fragments of the  $^1\text{H}$ - $^1\text{H}$  COSY spectrum of ligand **1a** (500.13 MHz,  $\text{CDCl}_3$ )



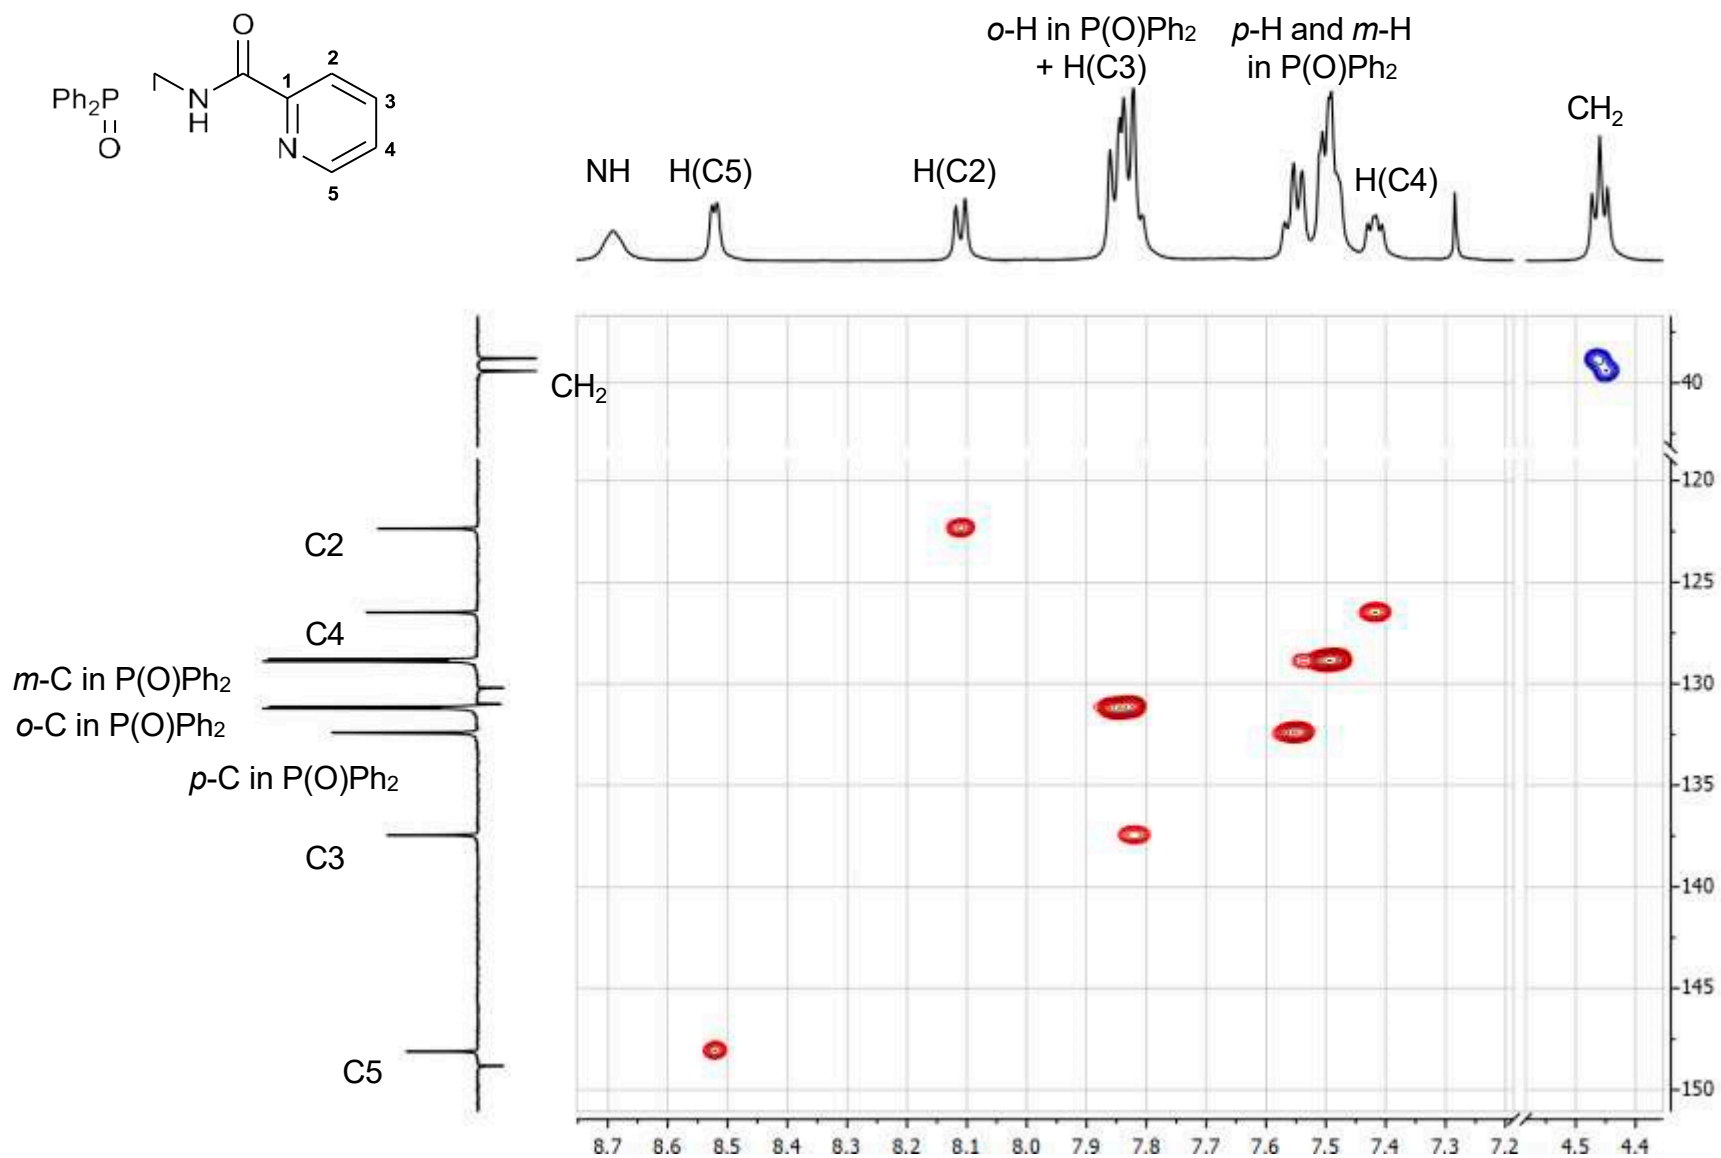

**Figure. S7.** Extended fragments of the  $^1\text{H}$ - $^{13}\text{C}$  HSQC spectrum of ligand **1a** ( $\text{CDCl}_3$ )

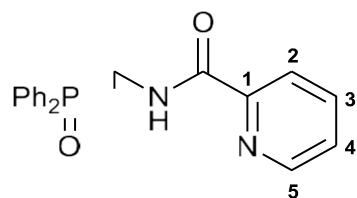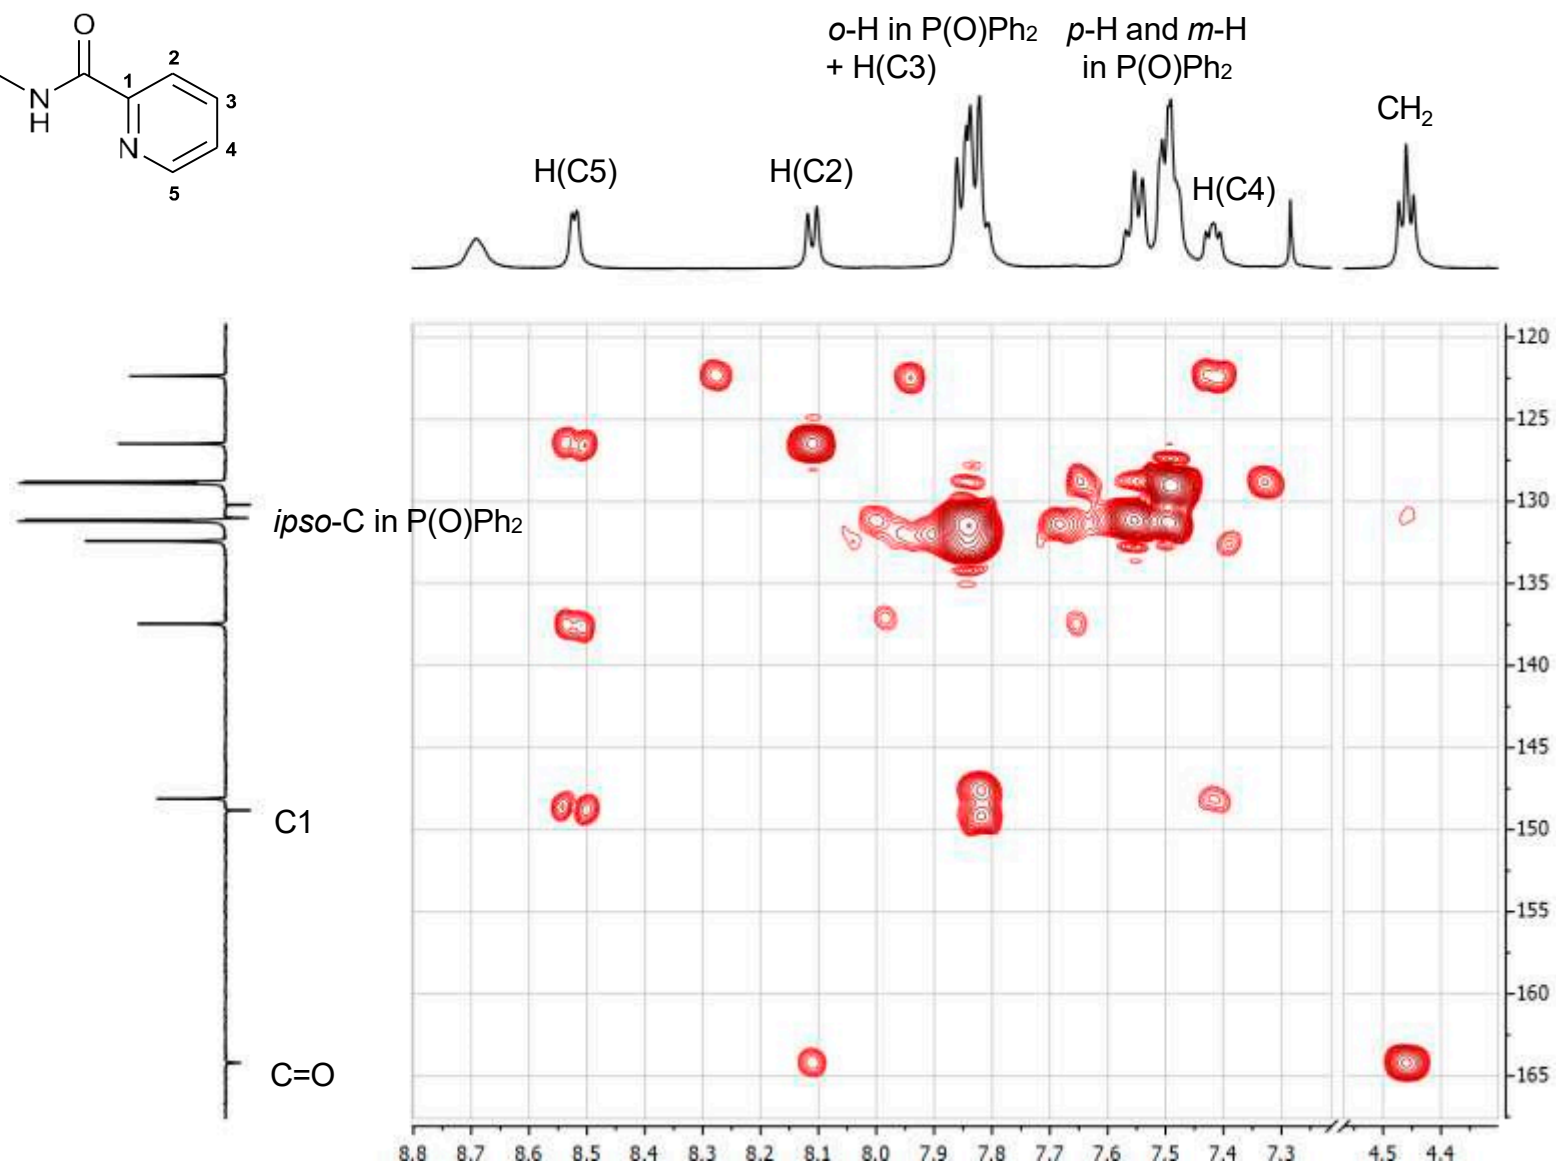

**Figure. S8.** Extended fragments of the <sup>1</sup>H-<sup>13</sup>C HMBC spectrum of ligand **1a** (CDCl<sub>3</sub>)

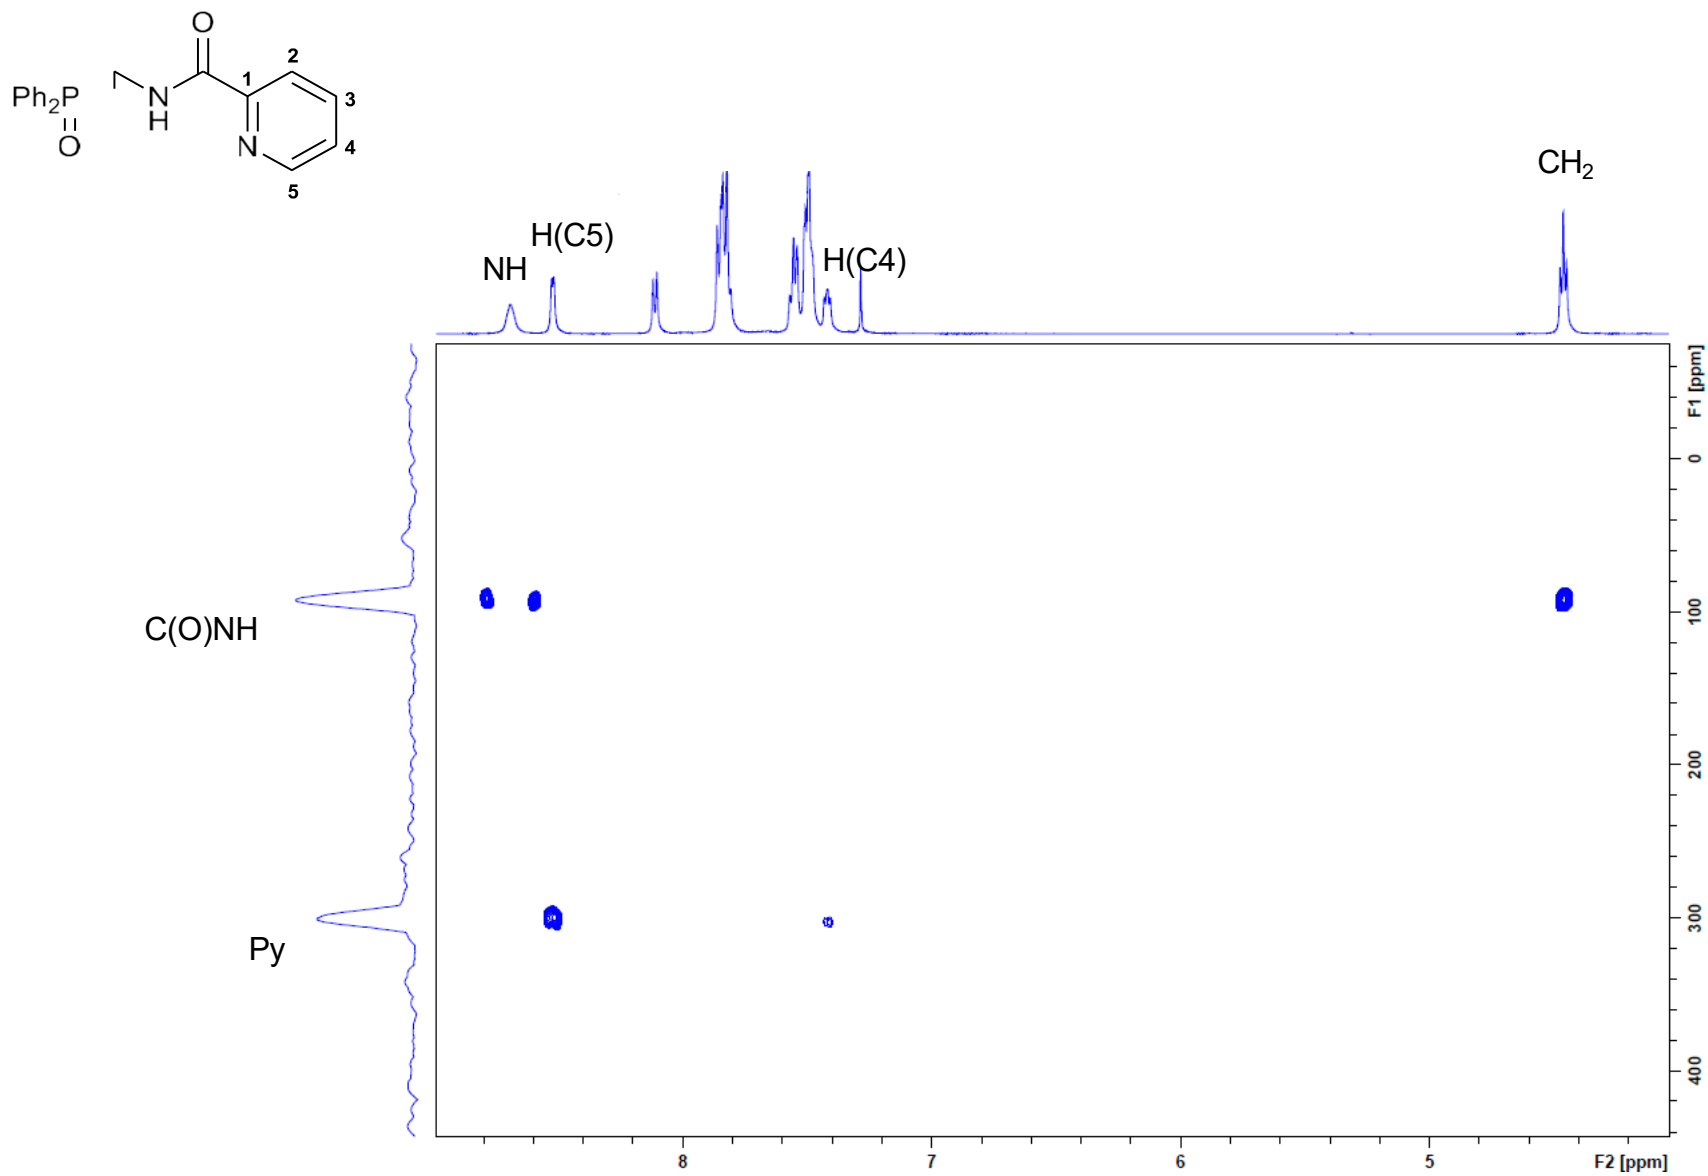

**Figure. S9.** <sup>1</sup>H-<sup>15</sup>N HMBC spectrum of ligand **1a** (CDCl<sub>3</sub>)

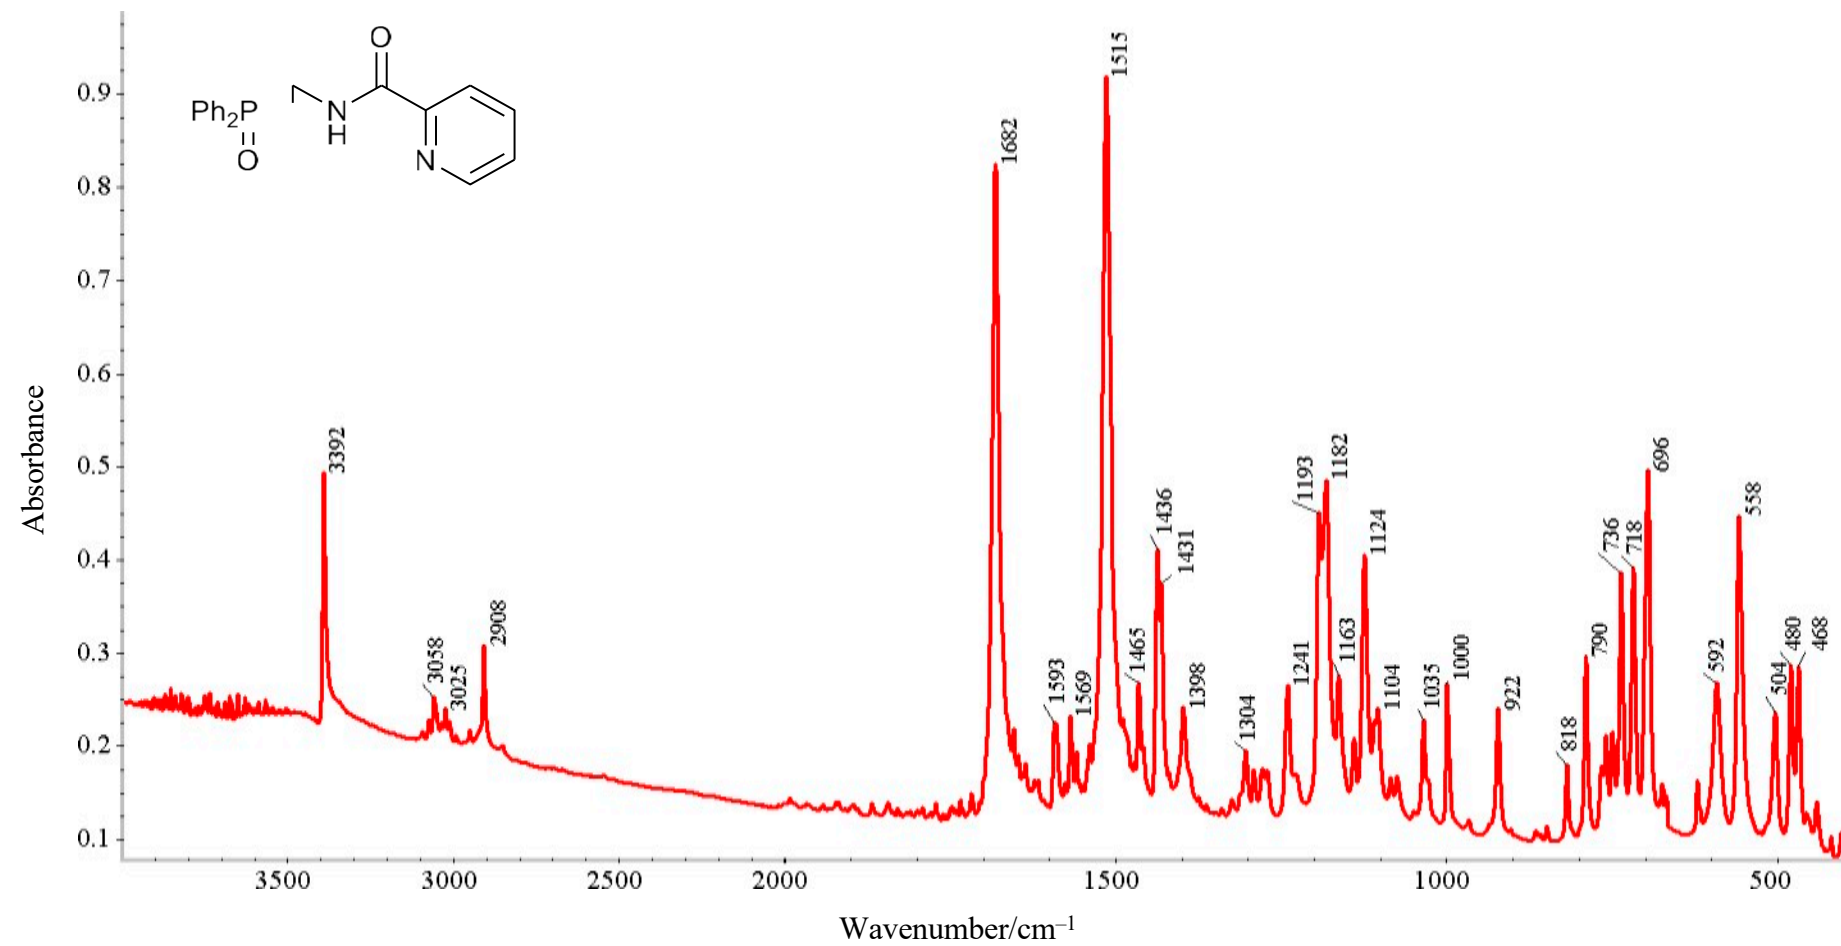

Figure. S10. IR spectrum of ligand 1a



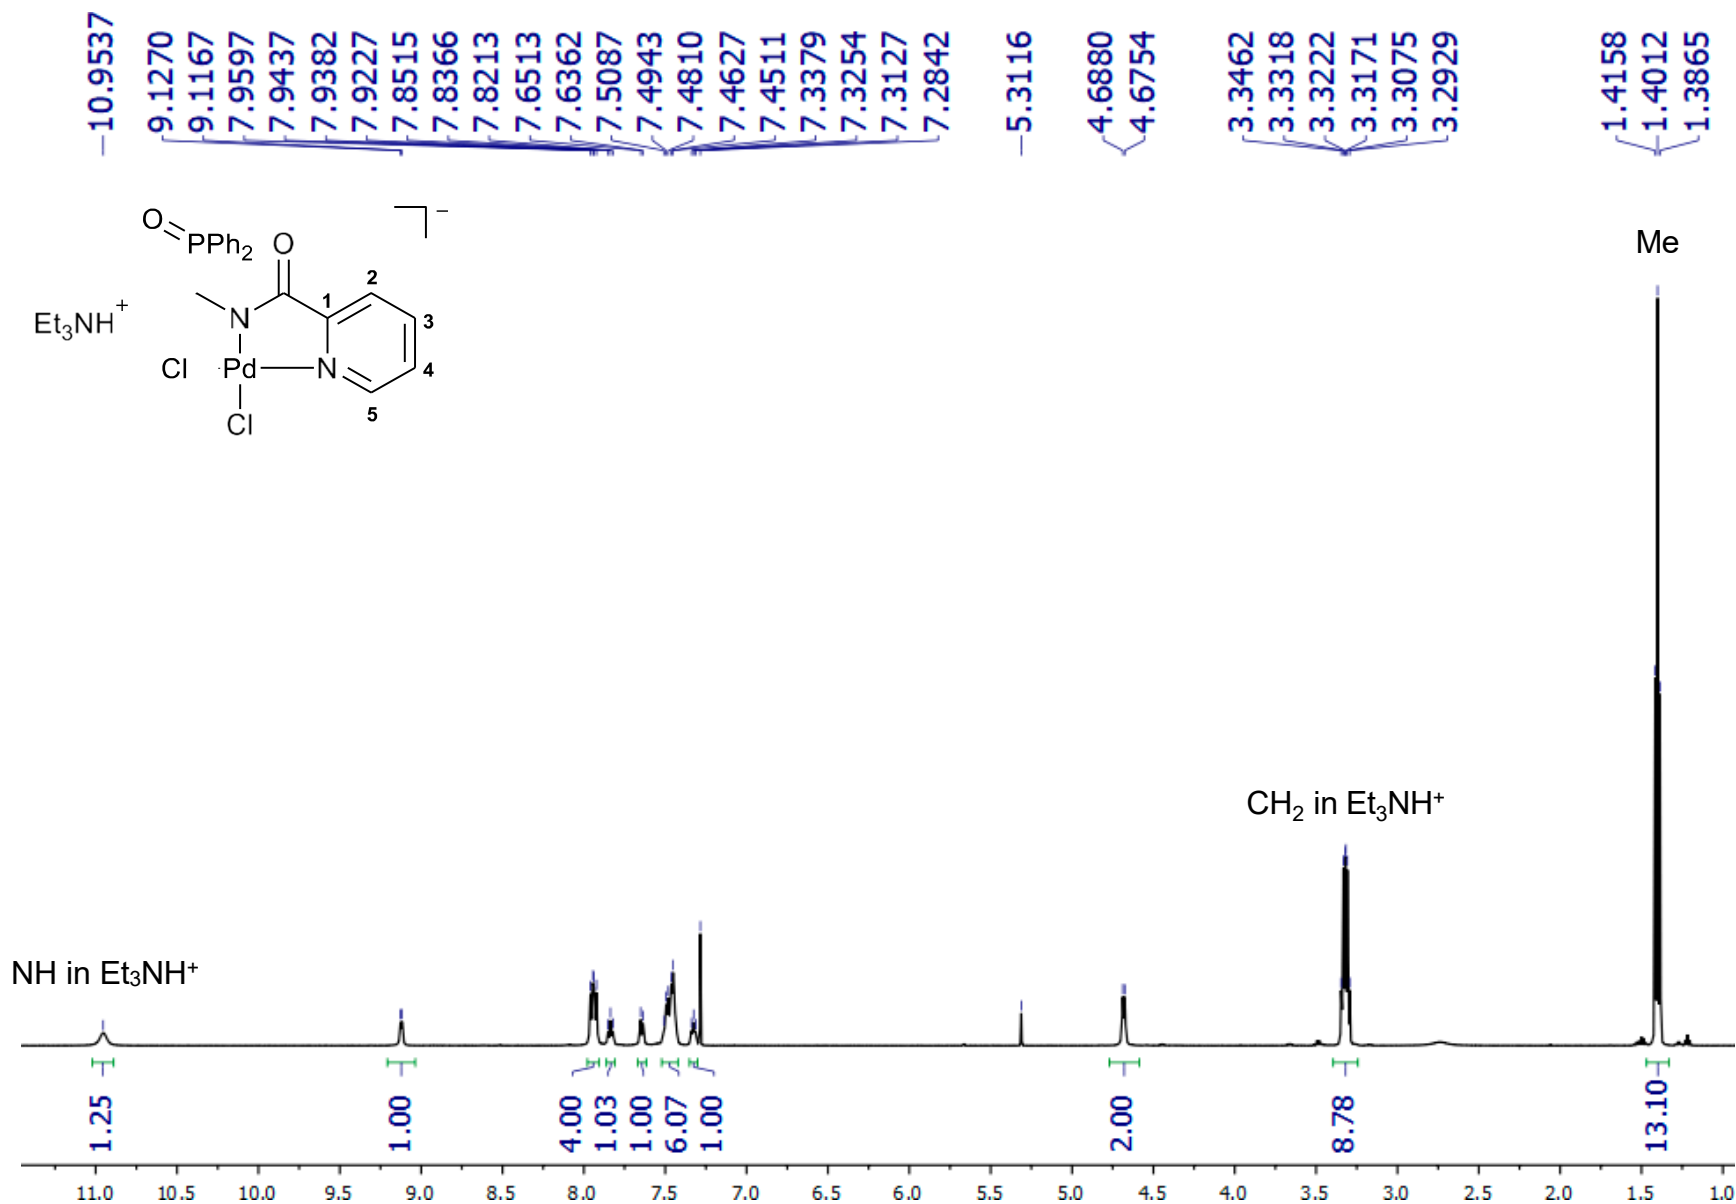

Figure S12.  $^1\text{H}$  NMR spectrum of complex **2a** (500.13 MHz,  $\text{CDCl}_3$ )

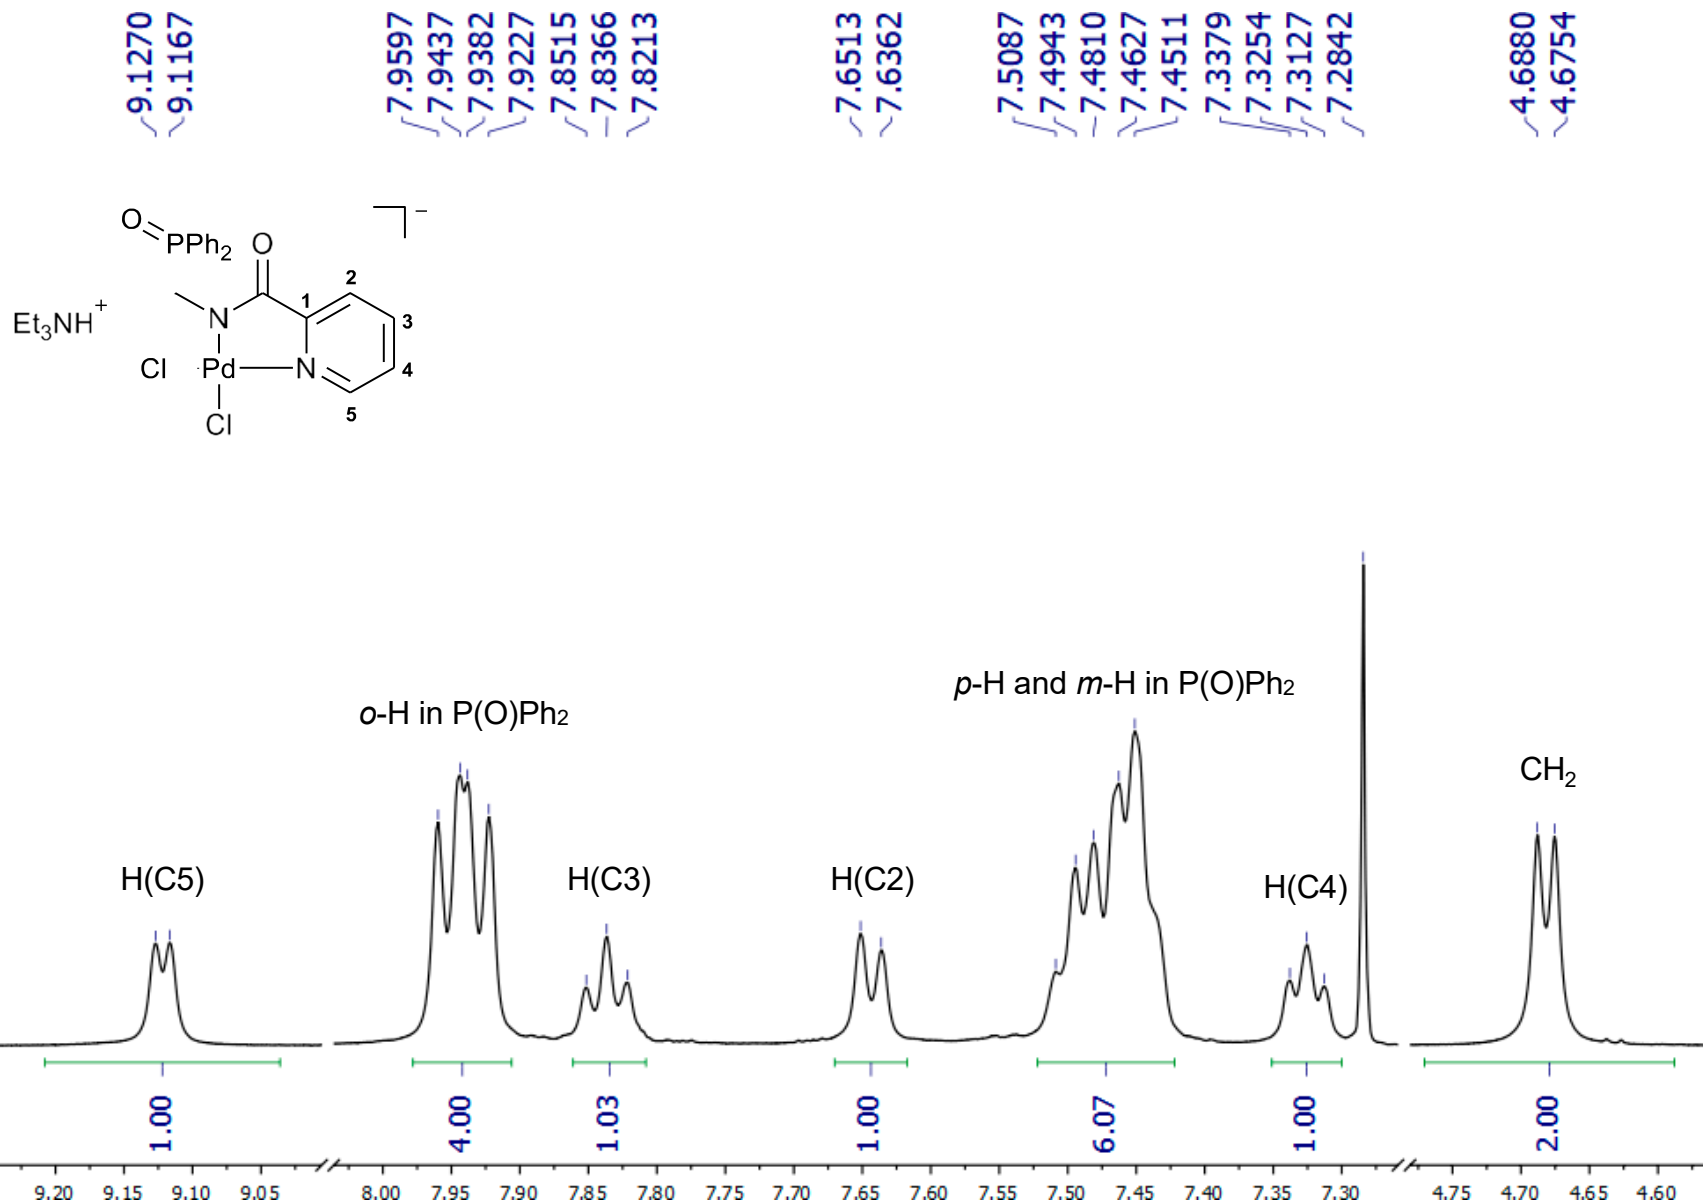

**Figure. S13.** Extended fragments of the  $^1\text{H}$  NMR spectrum of complex **2a** (500.13 MHz,  $\text{CDCl}_3$ )





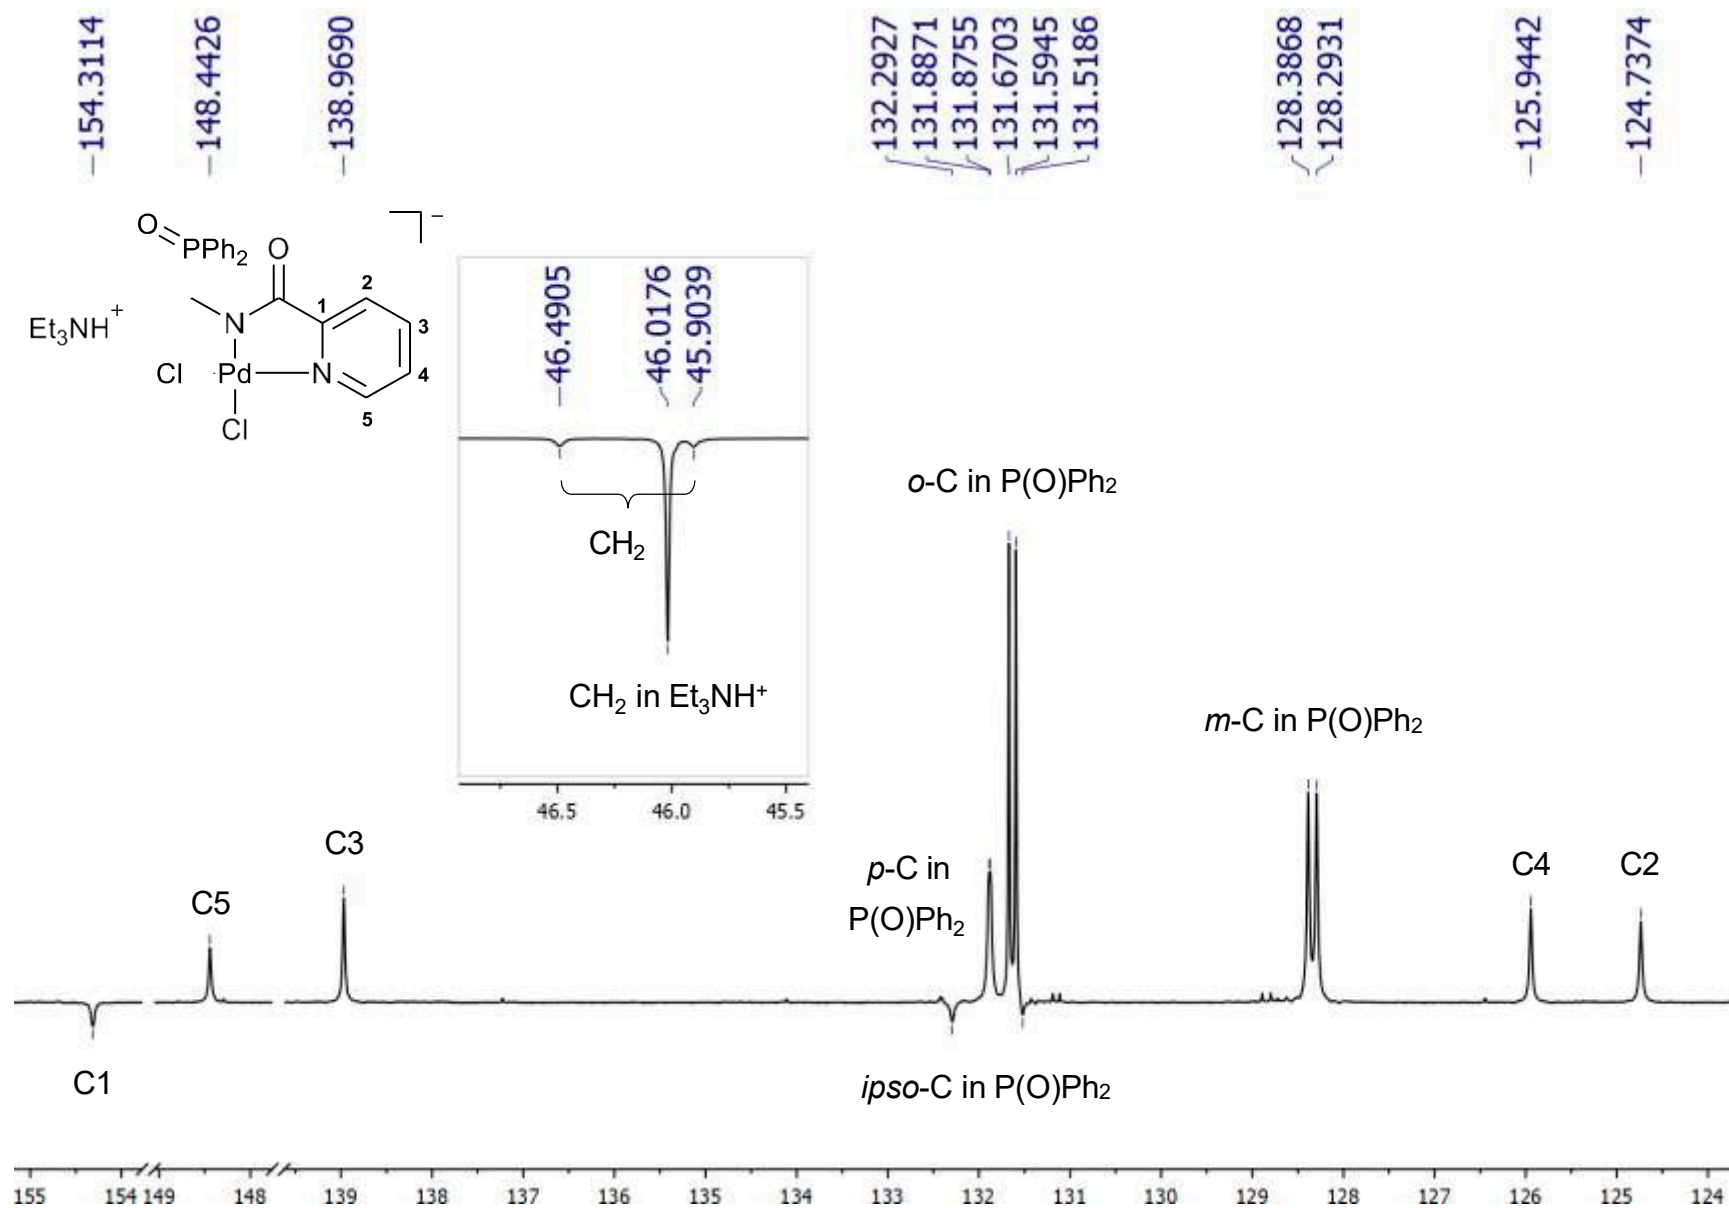

**Fig. S15.** Extended fragments of the  $^{13}\text{C}\{^1\text{H}\}$  NMR spectrum of complex **2a** (125.76 MHz,  $\text{CDCl}_3$ )

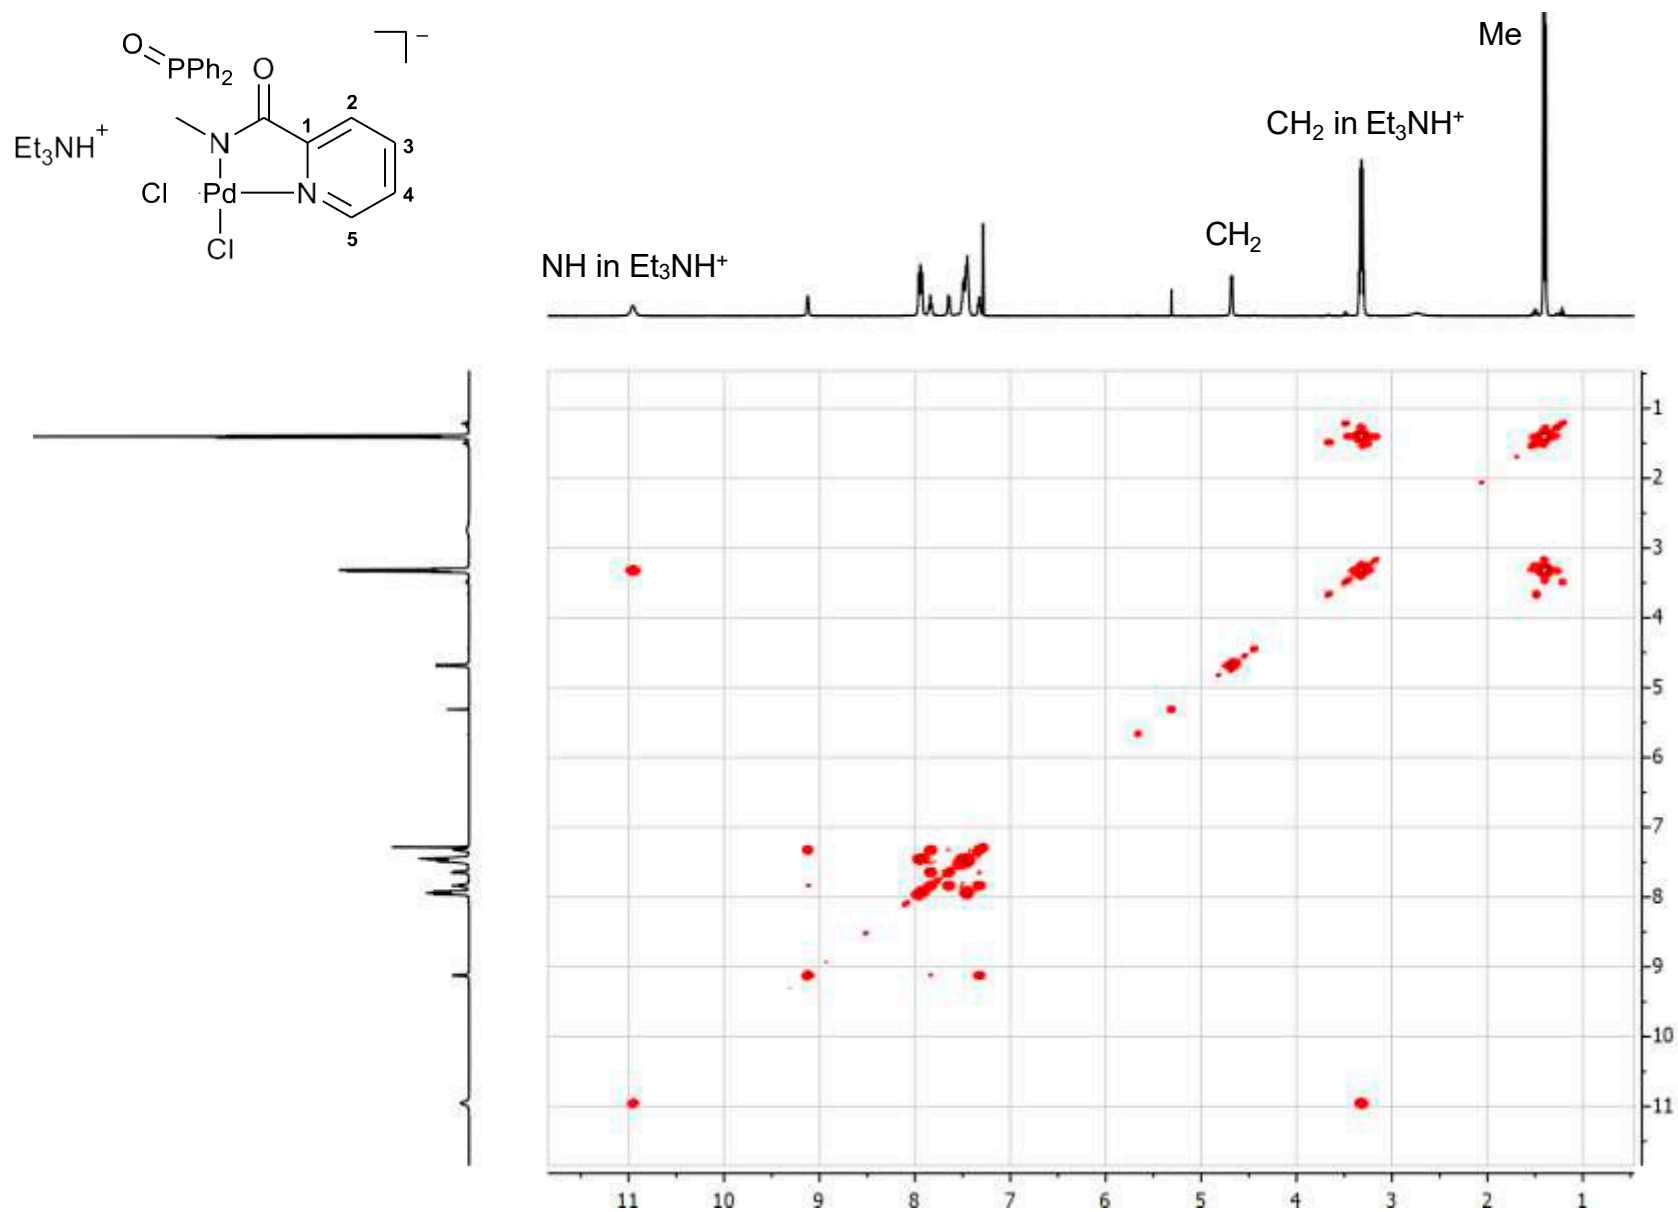

Figure. S16.  $^1\text{H}$ - $^1\text{H}$  COSY spectrum of complex **2a** (500.13 MHz,  $\text{CDCl}_3$ )

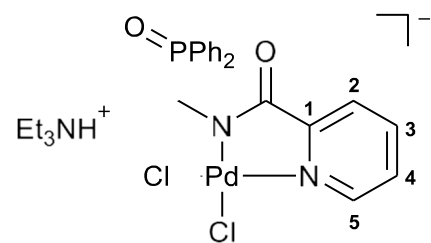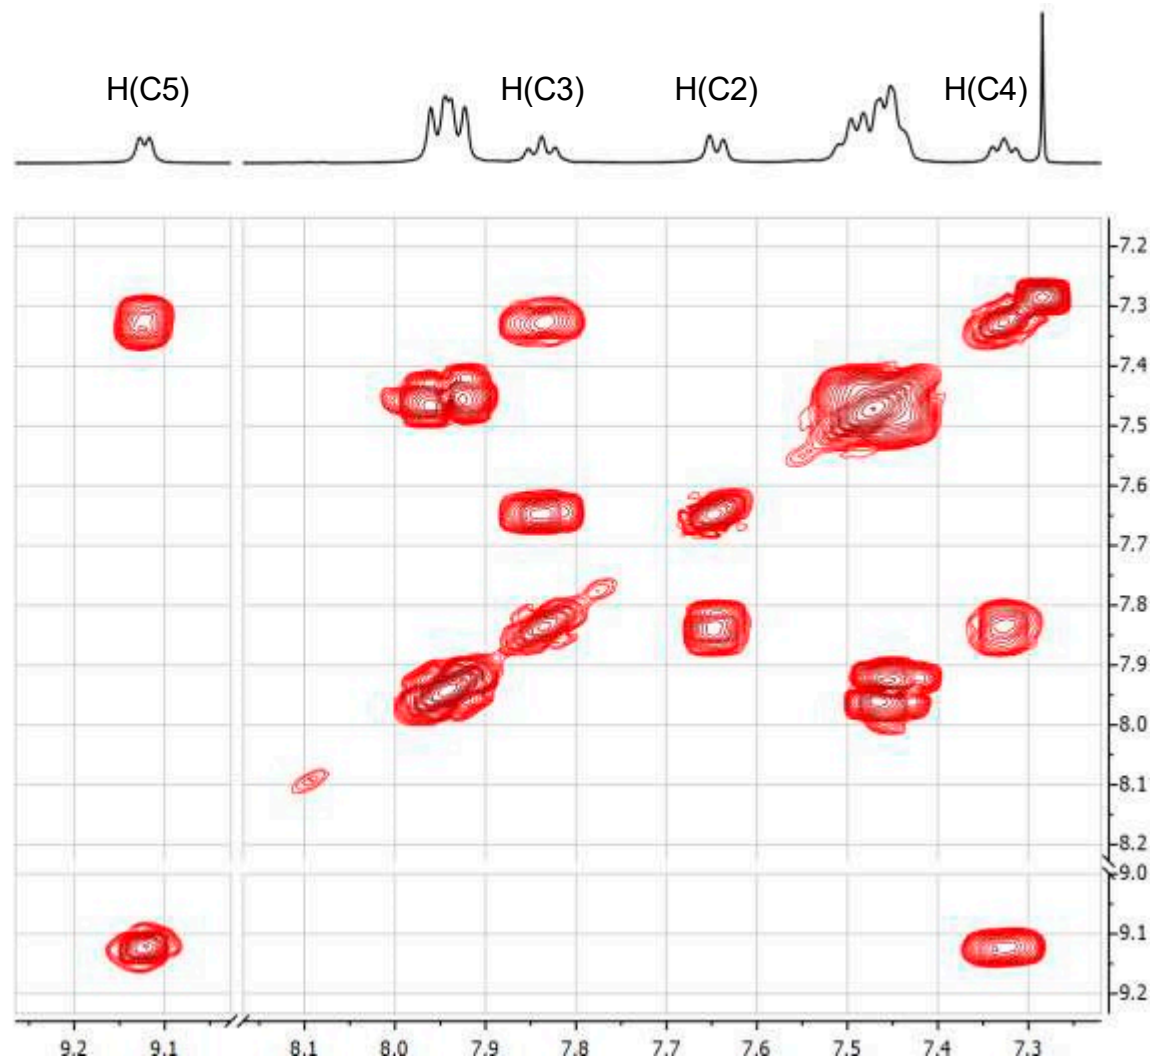

**Figure S17.**  $^1\text{H}$ - $^1\text{H}$  COSY spectrum of complex **2a** (500.13 MHz,  $\text{CDCl}_3$ )

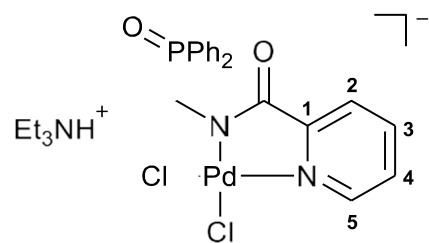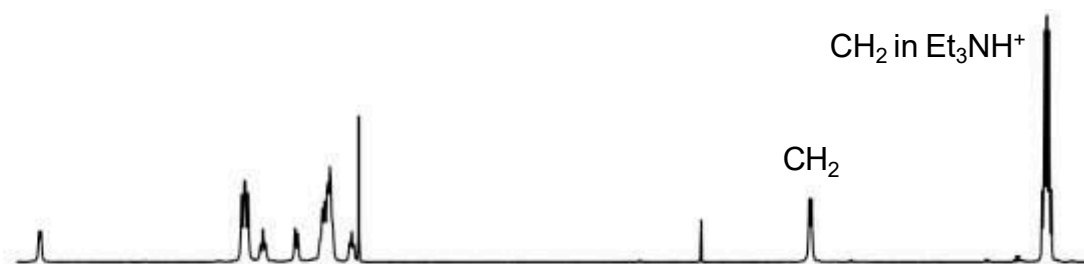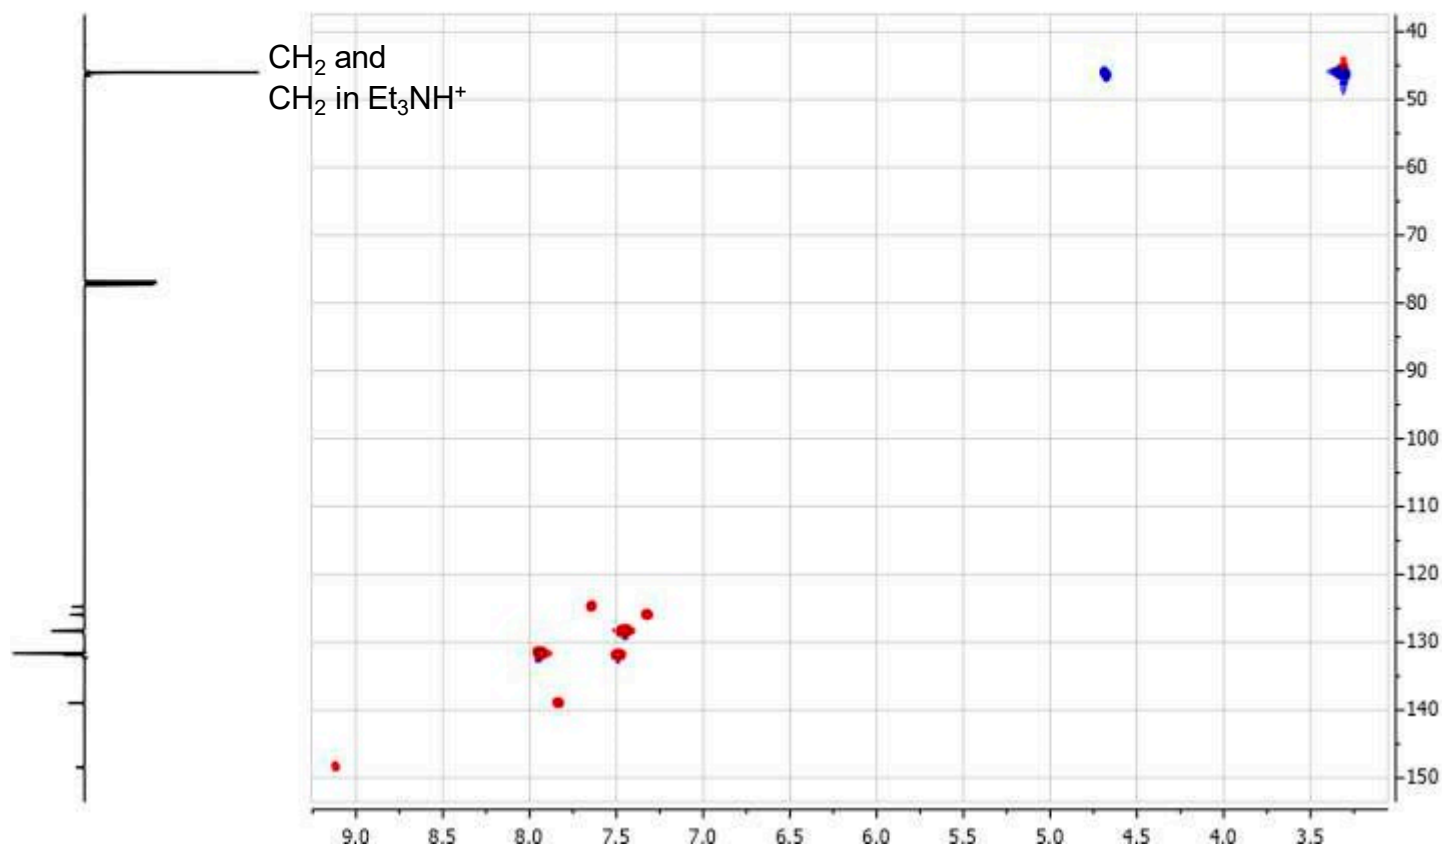

Figure S18.  $^1\text{H}$ - $^{13}\text{C}$  HSQC spectrum of complex **2a** ( $\text{CDCl}_3$ )

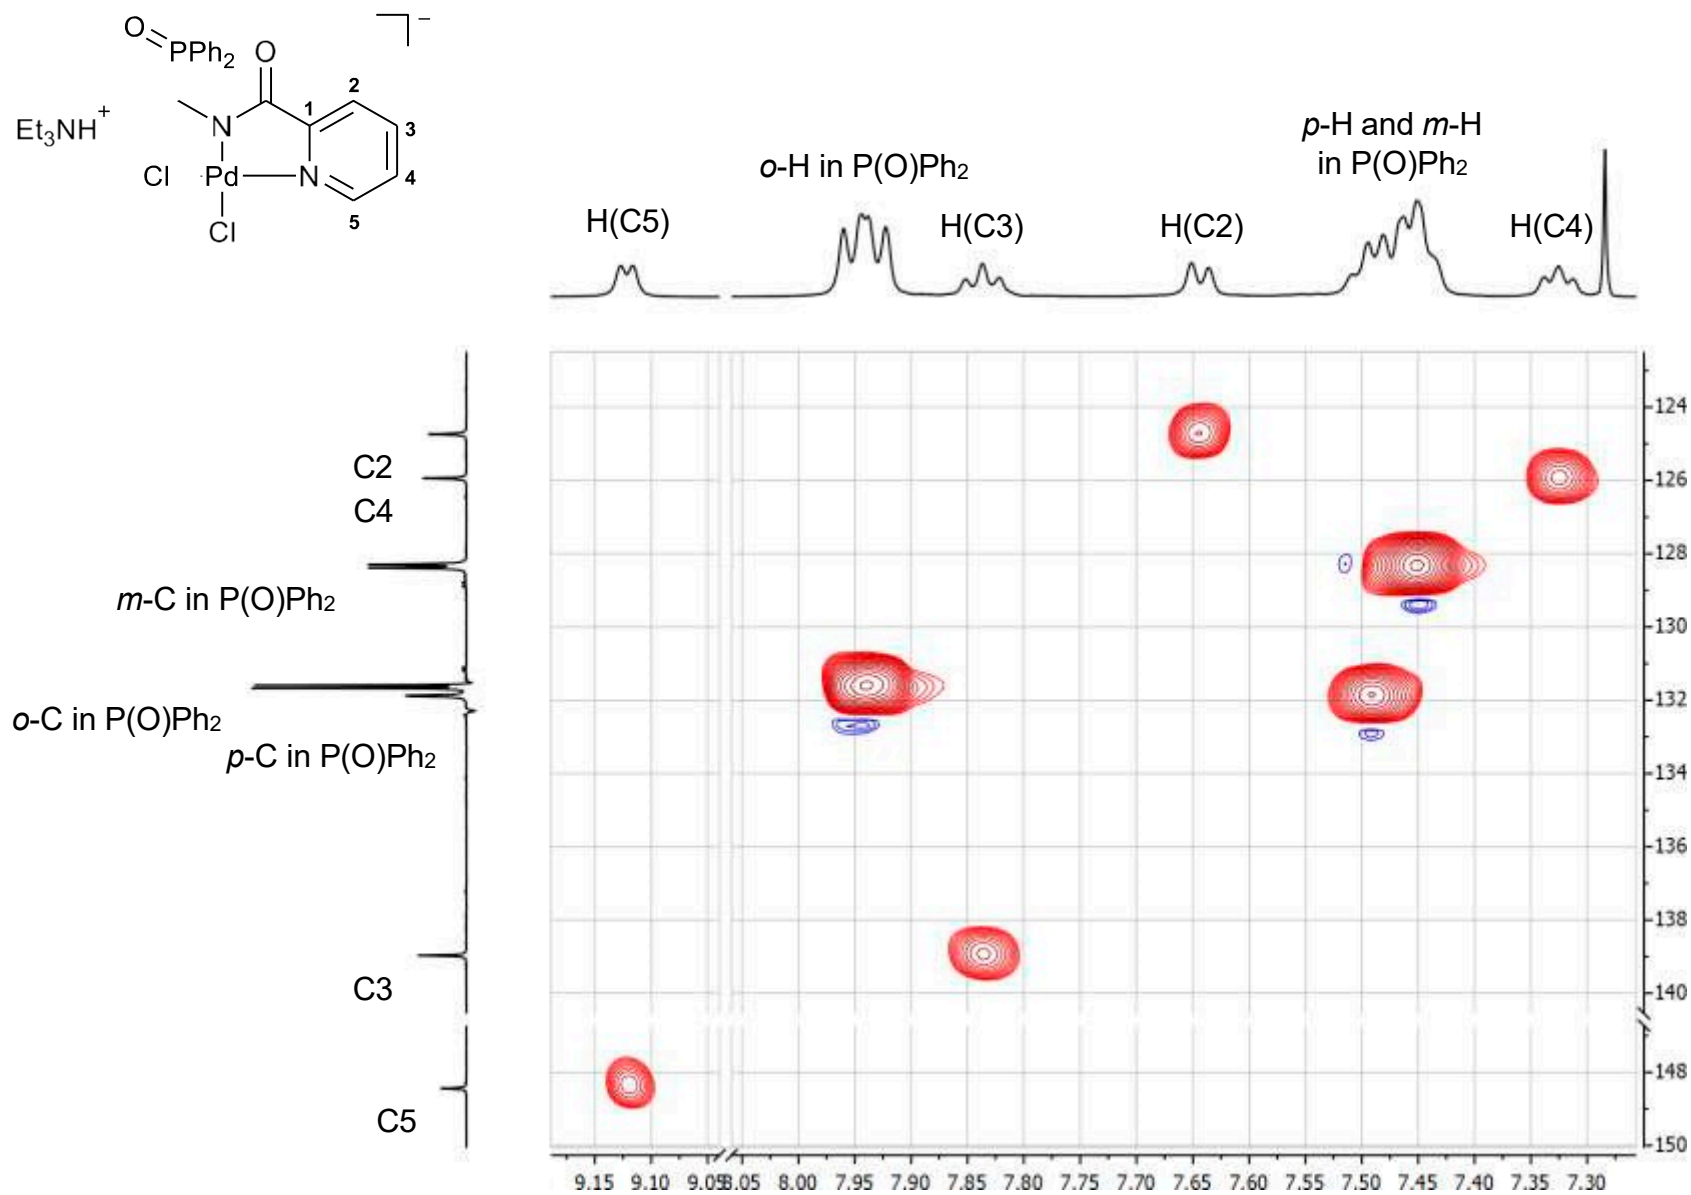

**Figure S19.** Extended fragments of the  $^1\text{H}$ - $^{13}\text{C}$  HSQC spectrum of complex **2a** ( $\text{CDCl}_3$ )

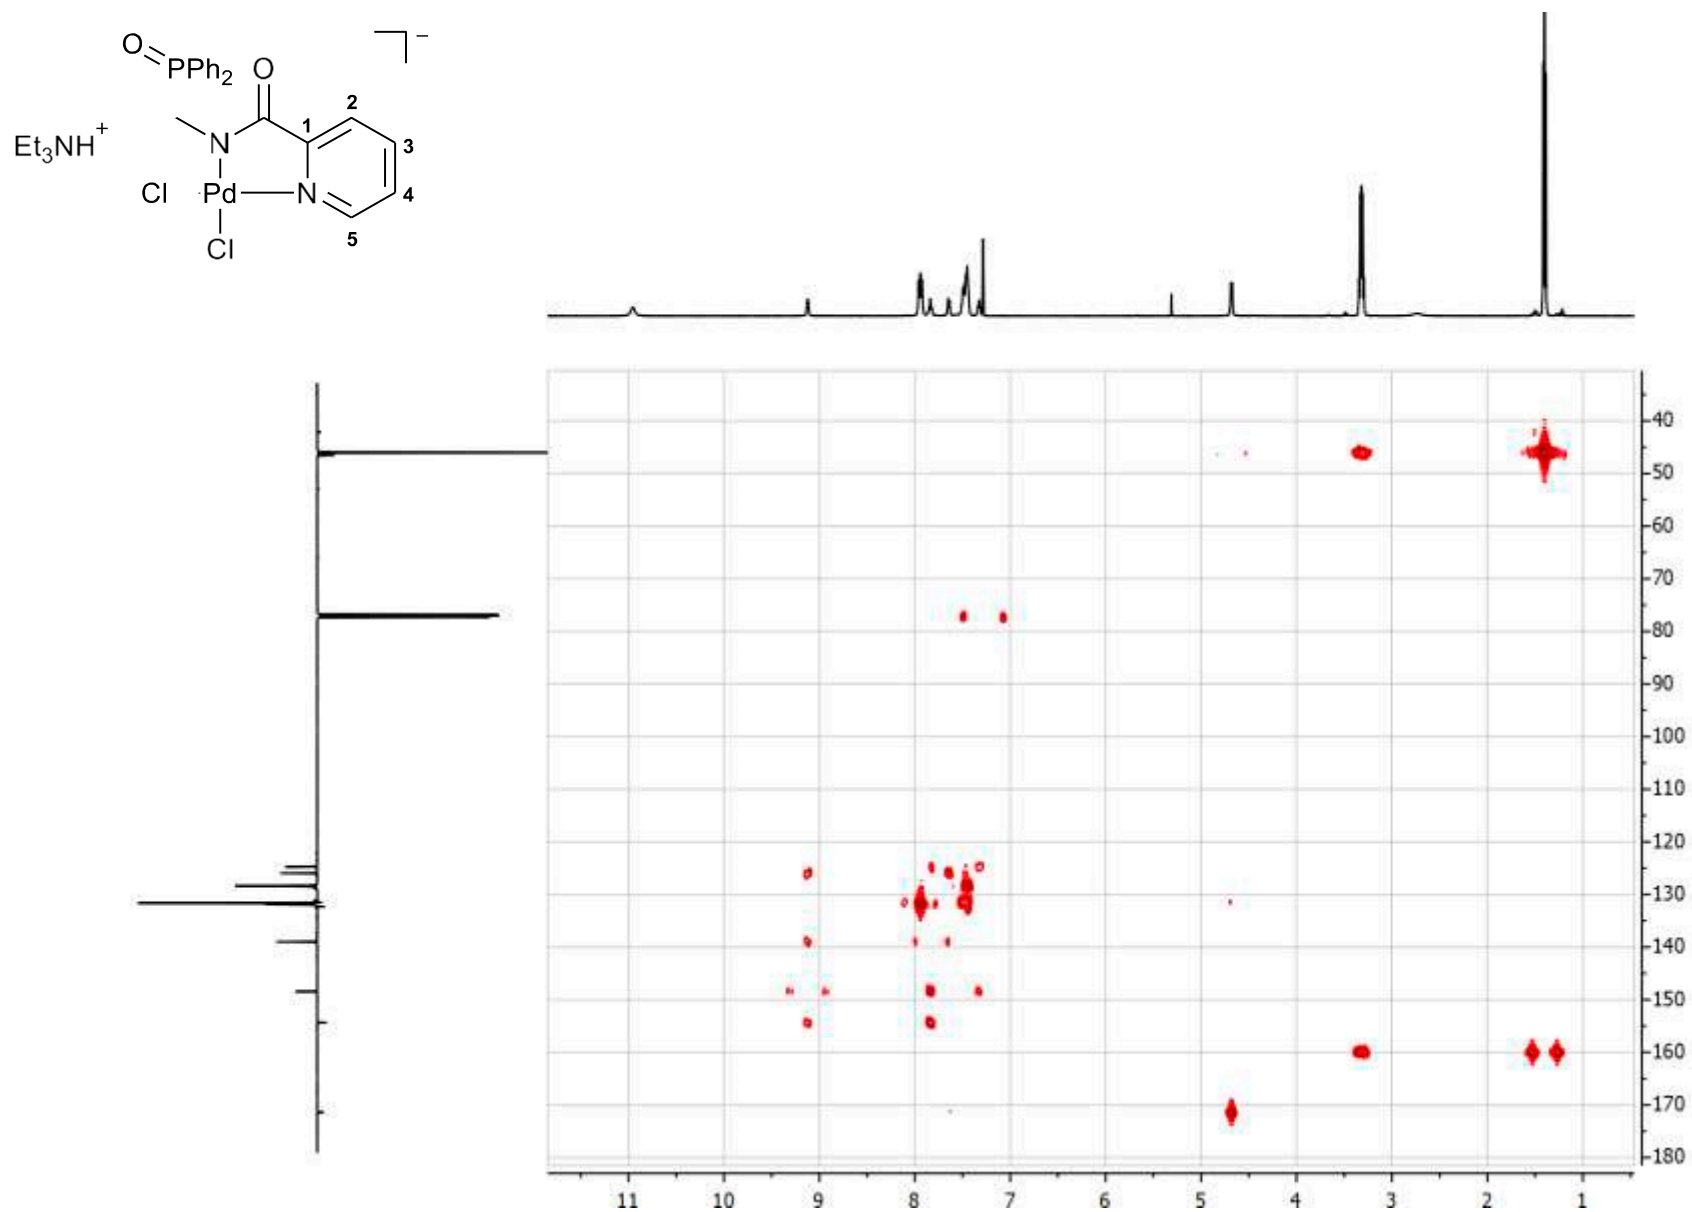

**Figure S20.** <sup>1</sup>H-<sup>13</sup>C HMBC spectrum of complex **2a** (CDCl<sub>3</sub>)

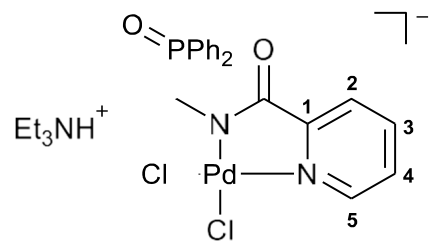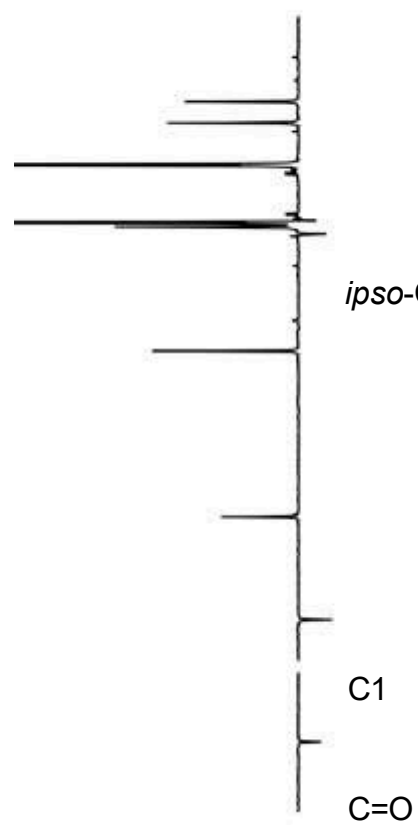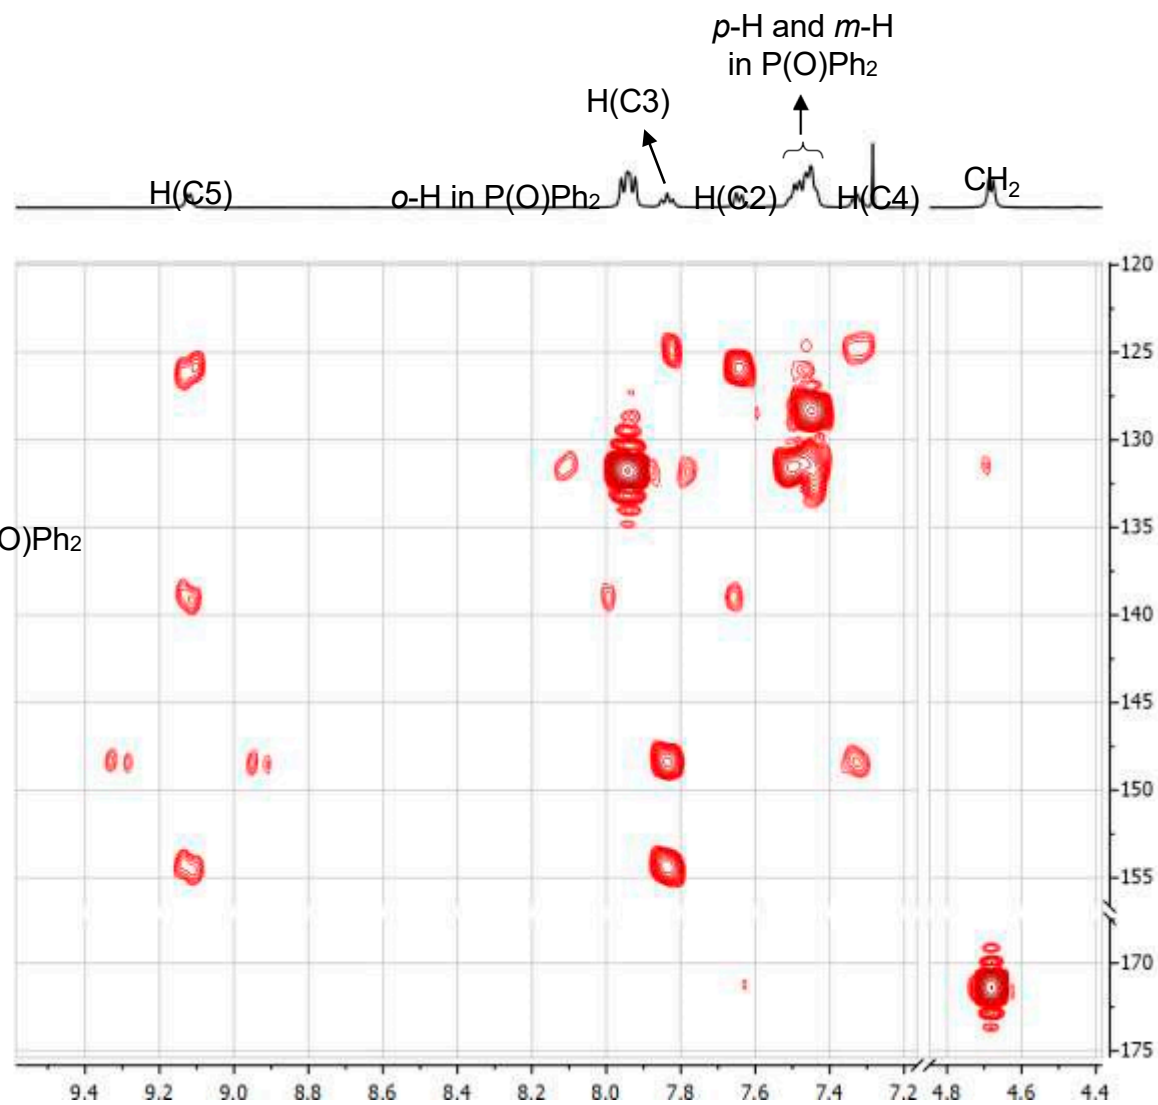

**Figure S21.** Extended fragments of the  $^1\text{H}$ - $^{13}\text{C}$  HMBC spectrum of complex **2a** ( $\text{CDCl}_3$ )



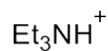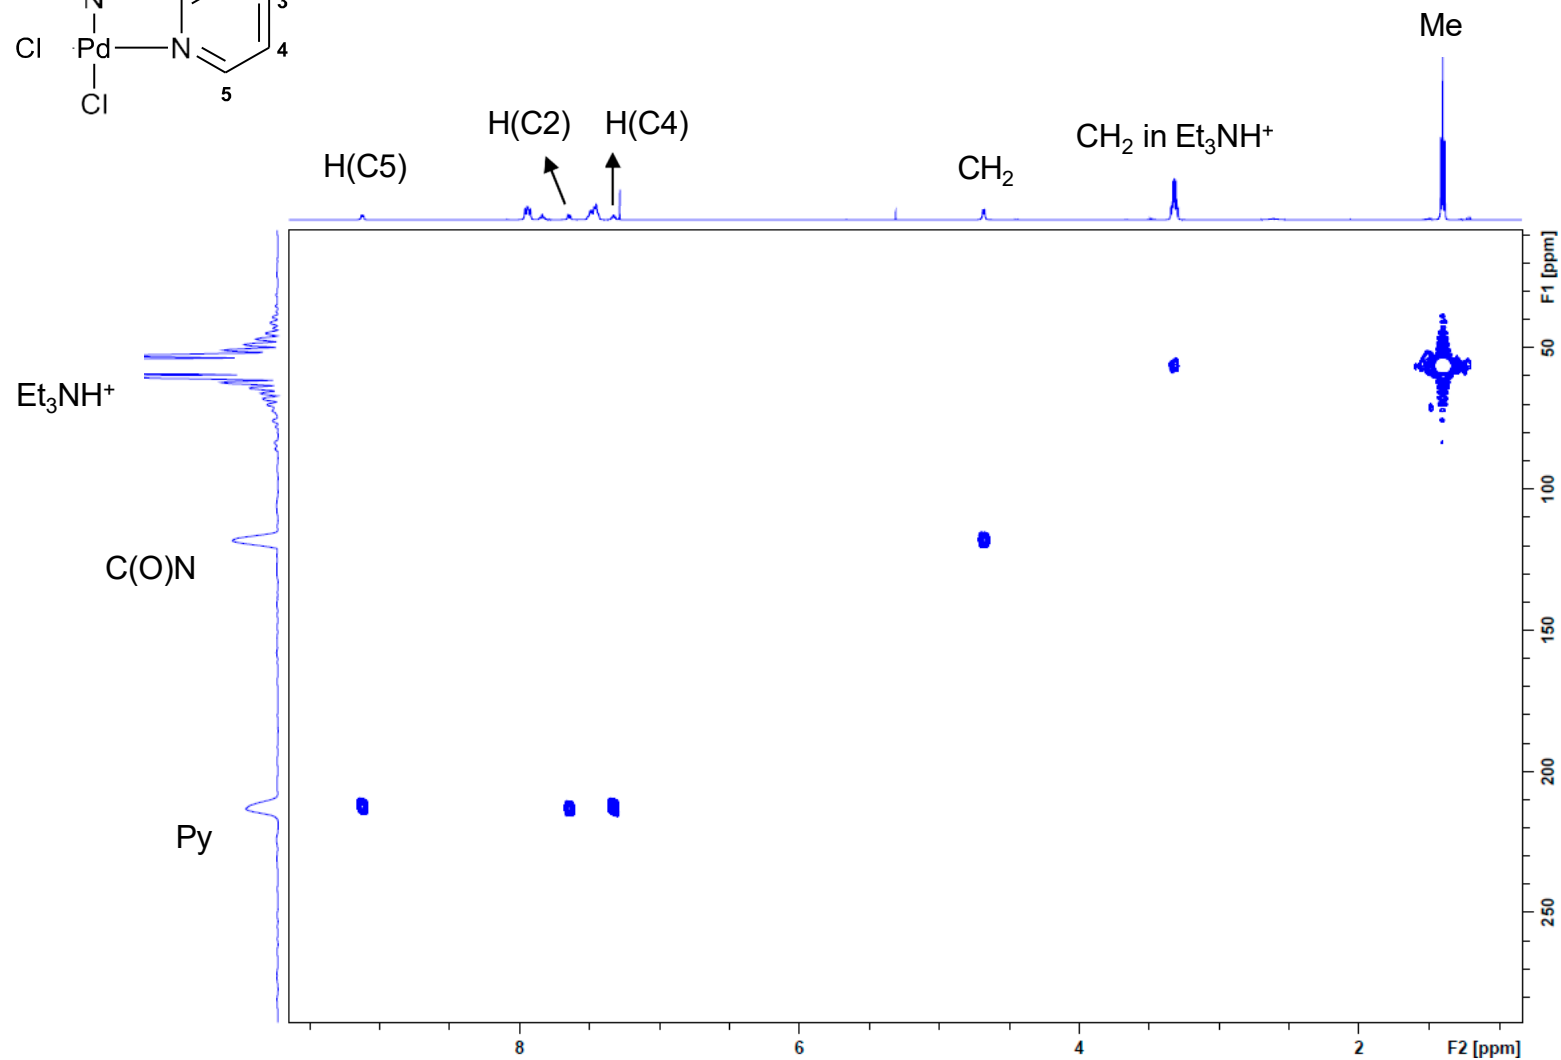

**Figure S22.**  $^1\text{H}$ - $^{15}\text{N}$  HMBC spectrum of complex **2a** ( $\text{CDCl}_3$ )

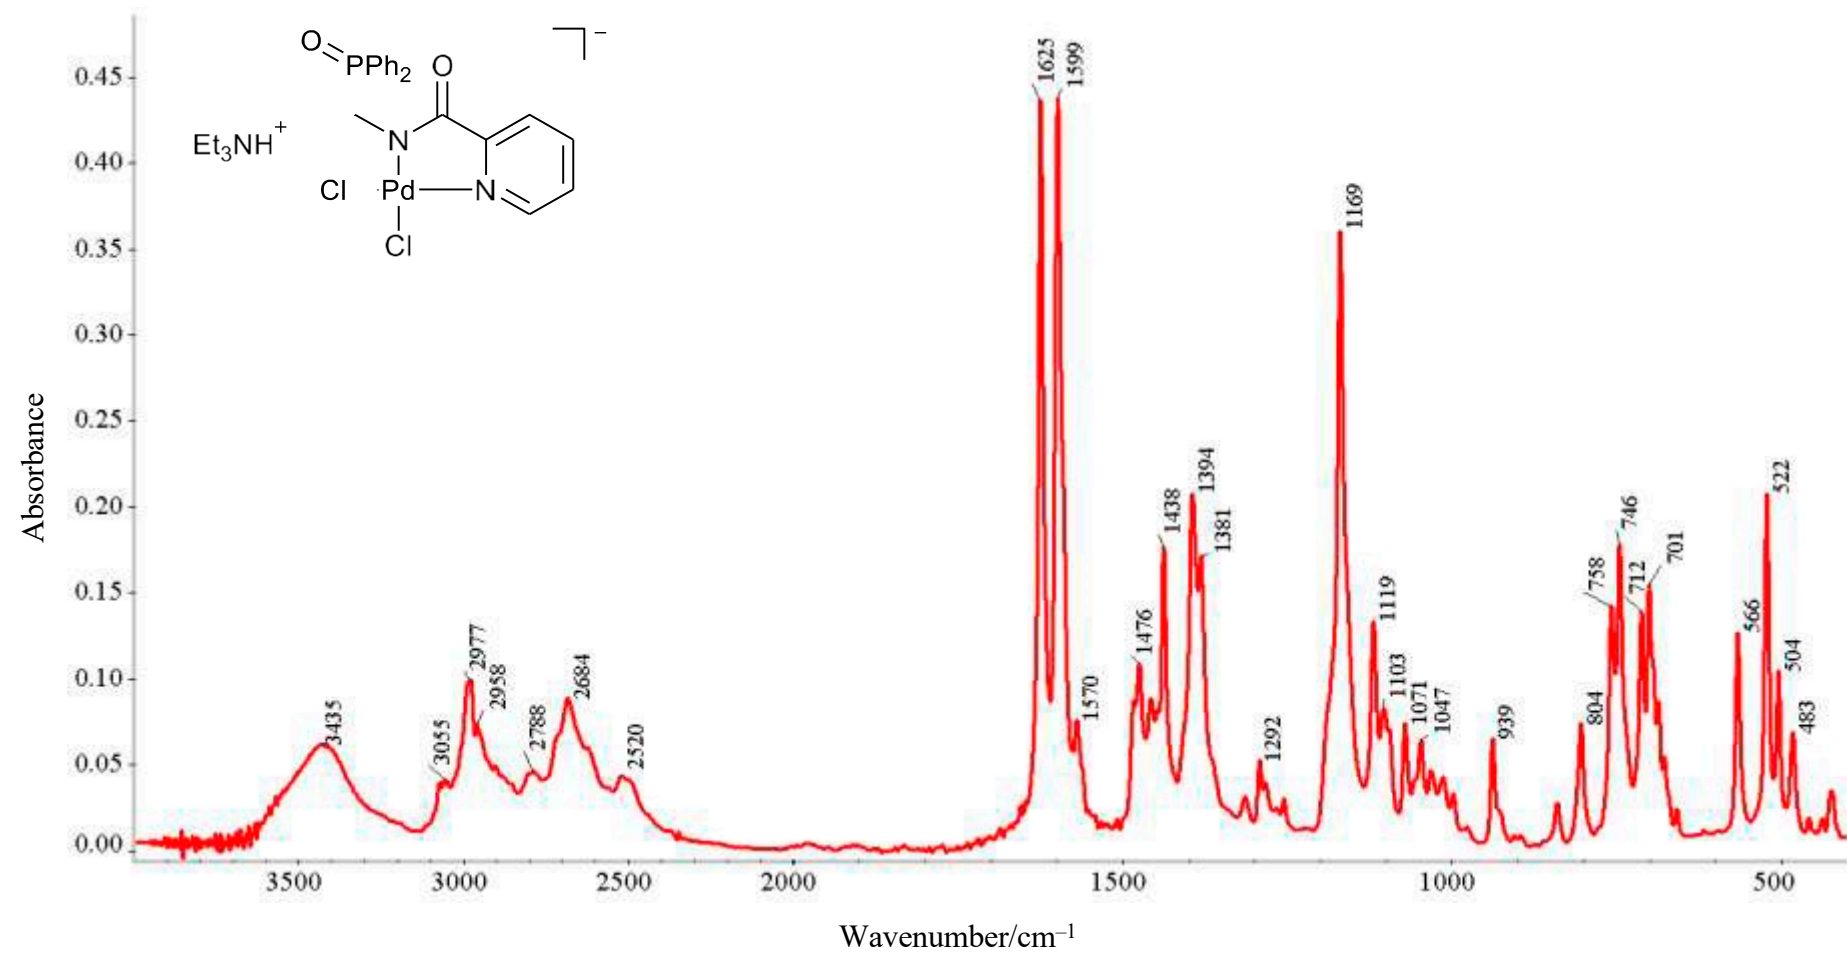

Figure. S23. IR spectrum of complex 2a

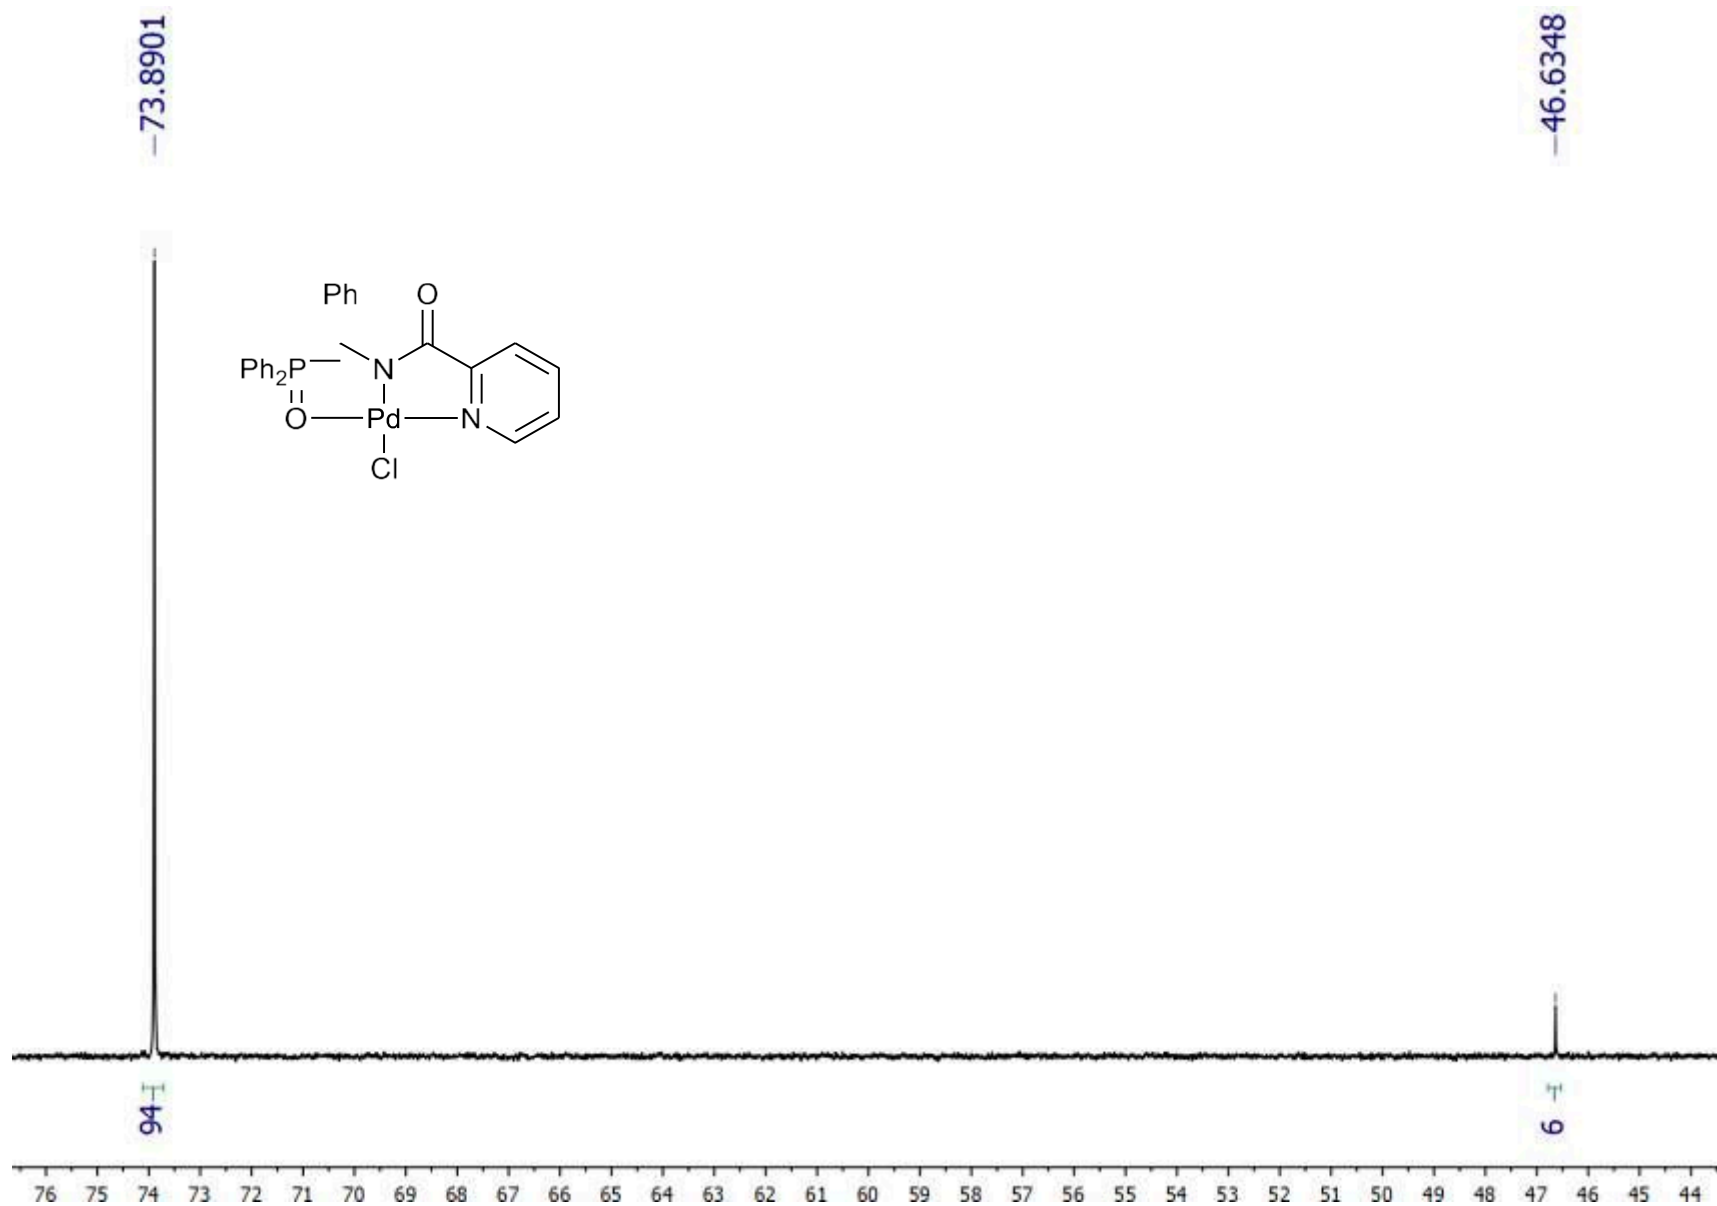

Figure S24.  $^{31}\text{P}\{^1\text{H}\}$  NMR spectrum of complex **3b** (202.45 MHz,  $\text{CDCl}_3$ )

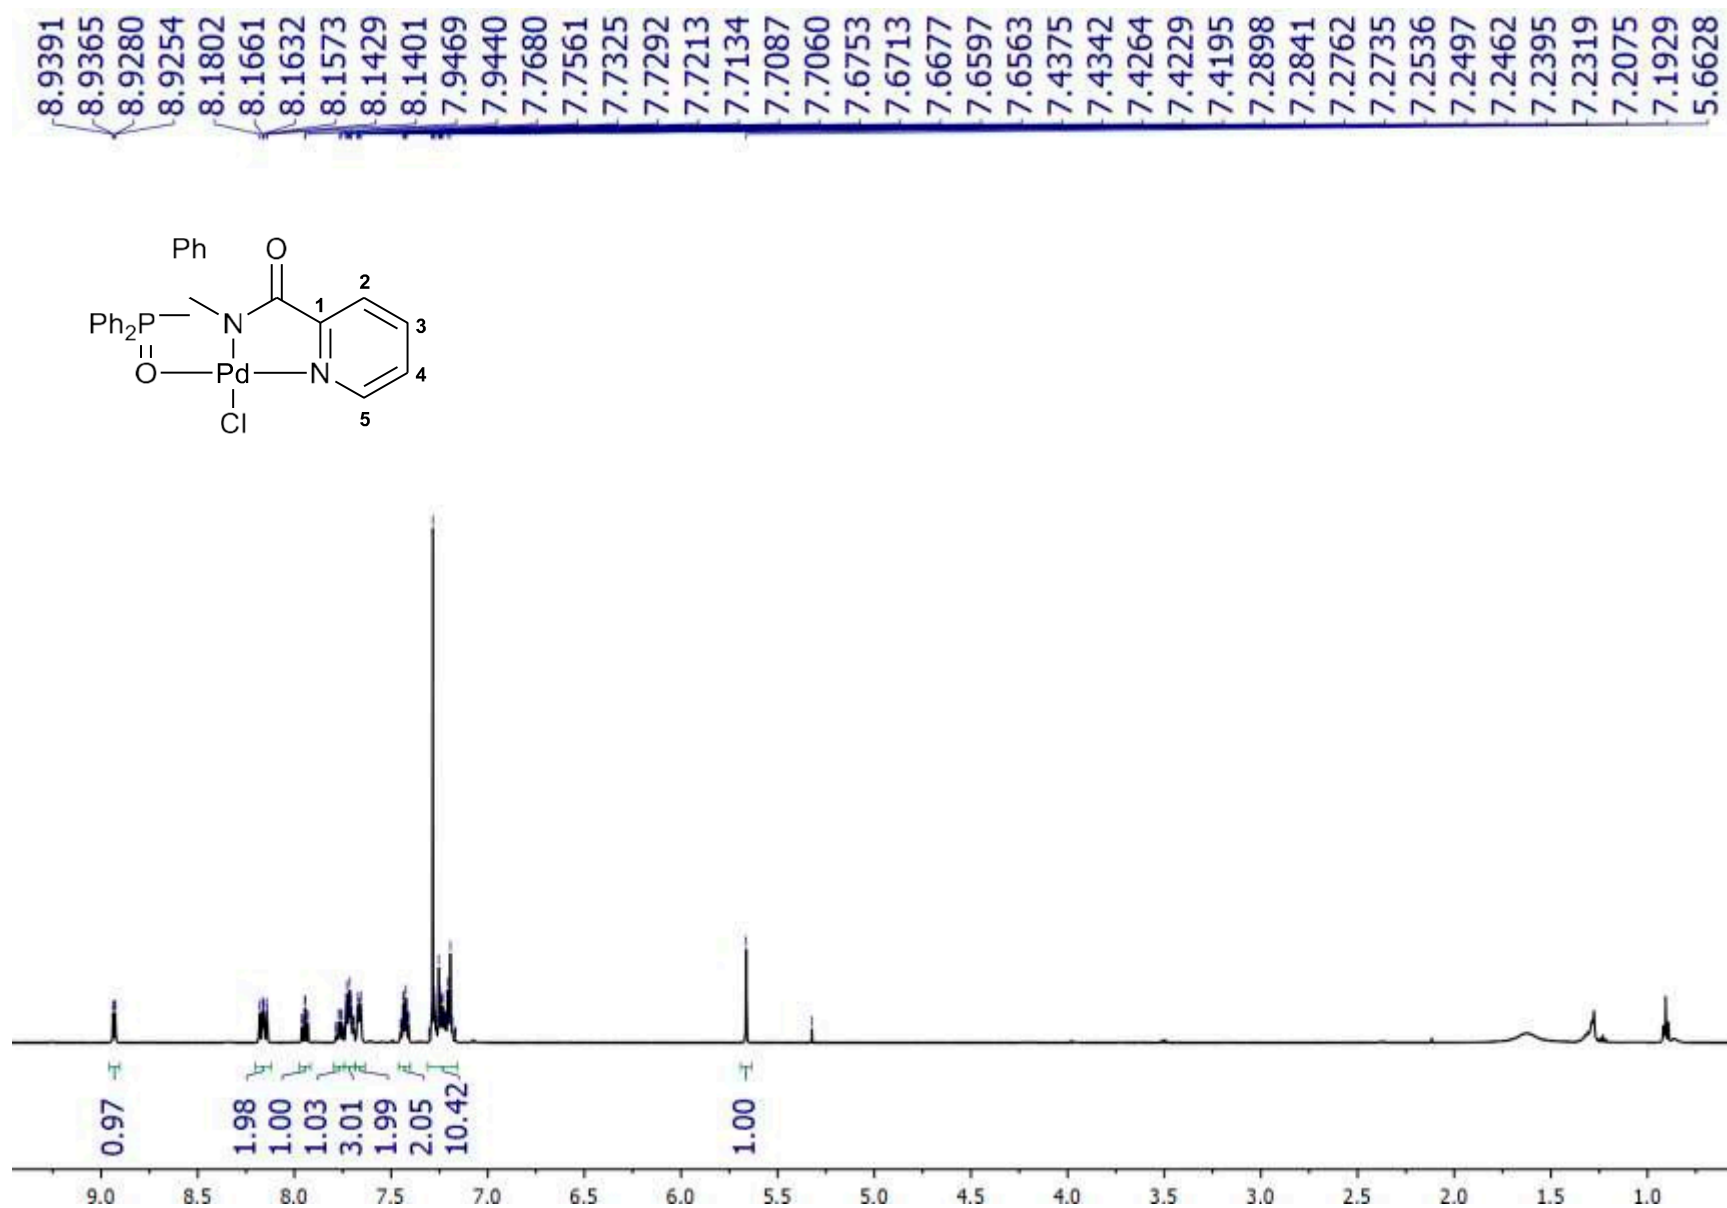

Figure S25.  $^1\text{H}$  NMR spectrum of complex **3b** (500.13 MHz,  $\text{CDCl}_3$ )

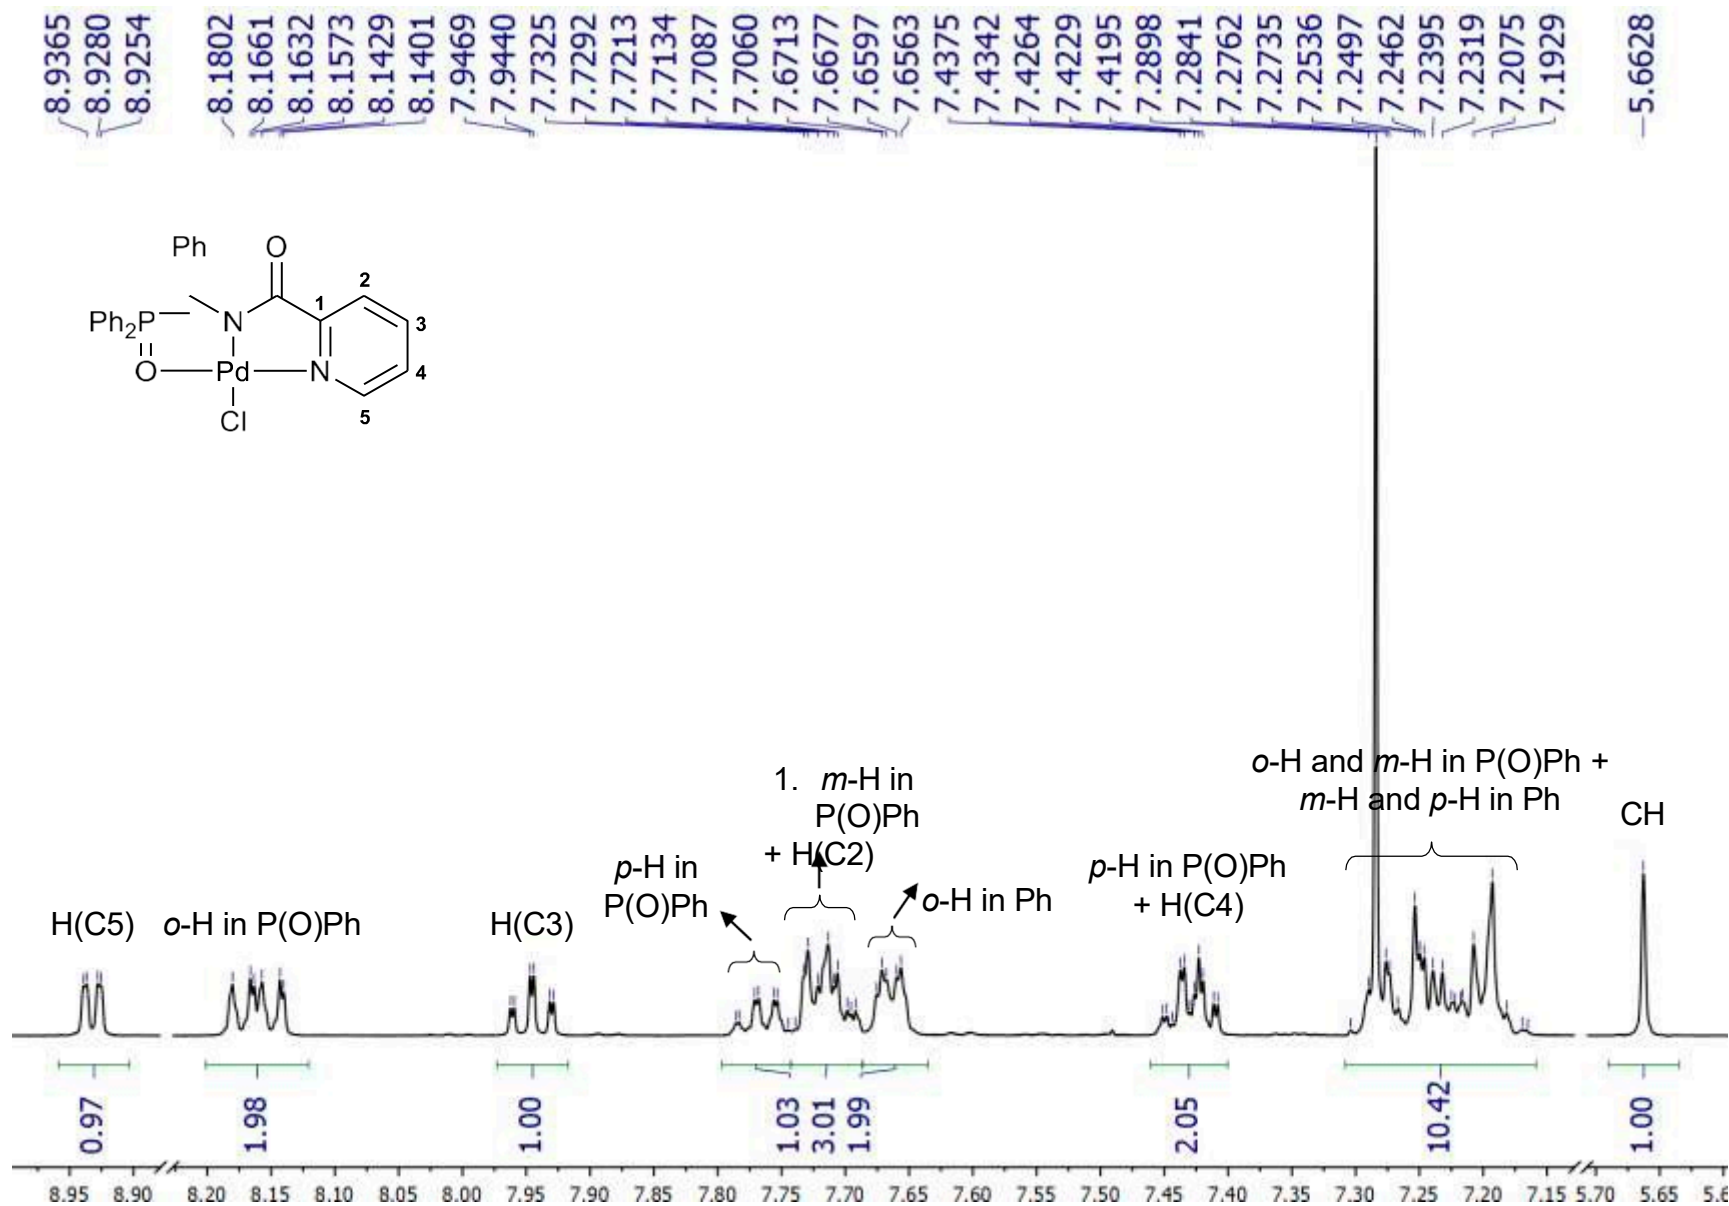

**Figure S26.** Extended fragments of the <sup>1</sup>H NMR spectrum of complex **3b** (500.13 MHz, CDCl<sub>3</sub>)

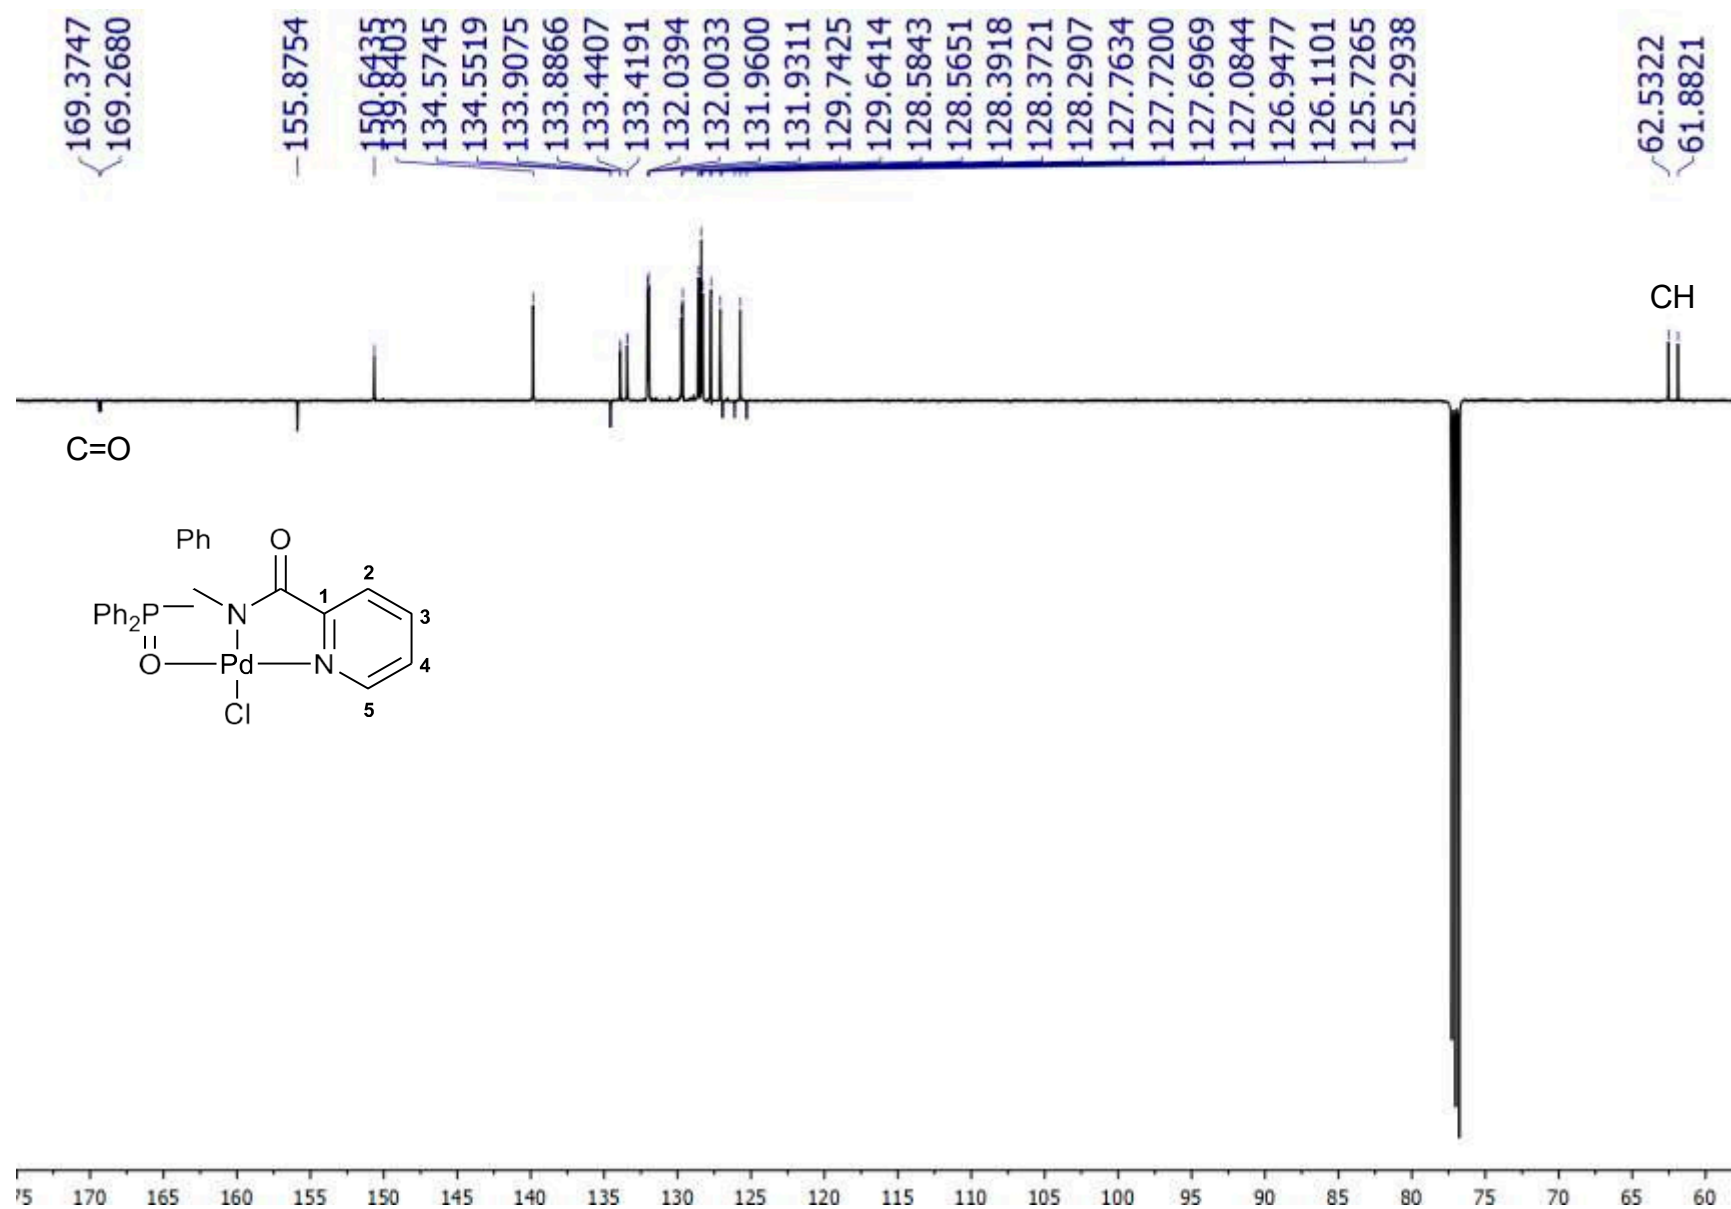

Figure S27.  $^{13}\text{C}\{^1\text{H}\}$  NMR spectrum of complex **3b** (125.76 MHz,  $\text{CDCl}_3$ )

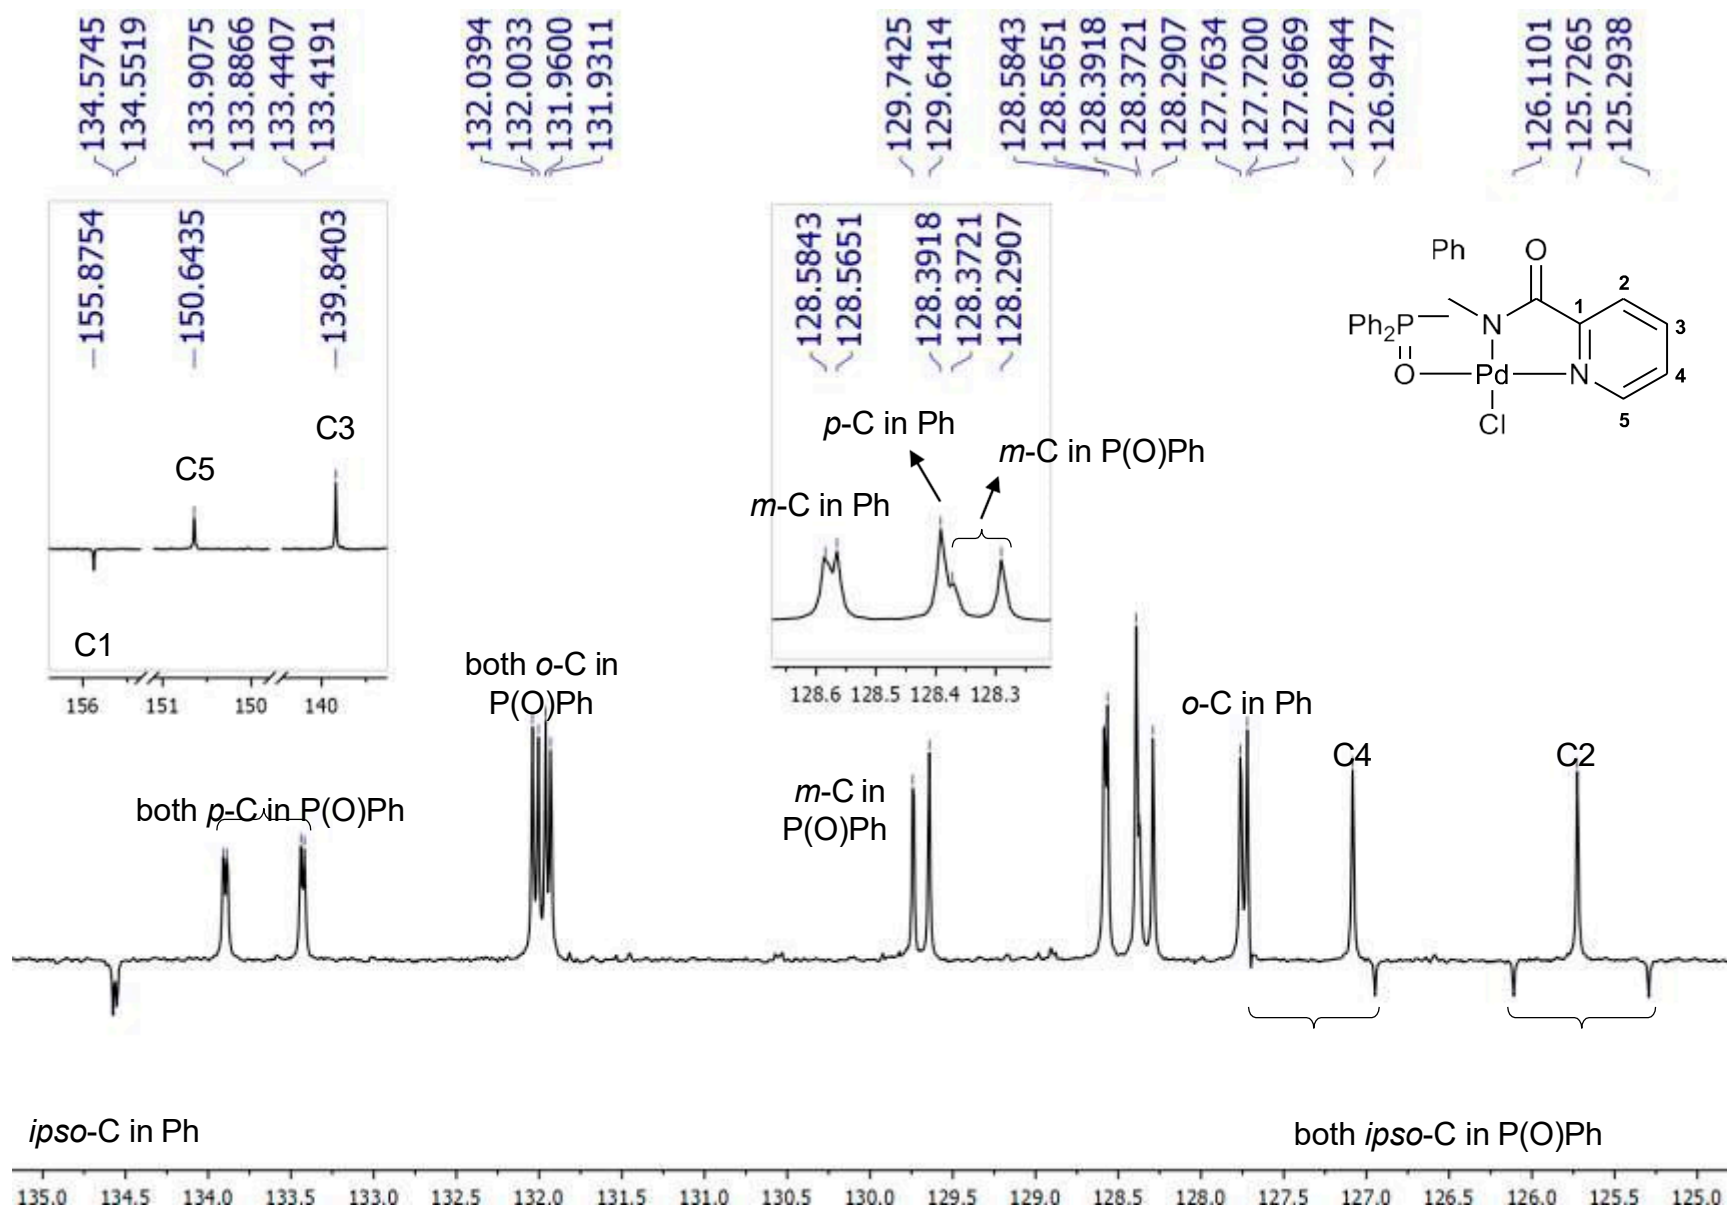

Figure S28. Extended fragments of the  $^{13}\text{C}\{^1\text{H}\}$  NMR spectrum of complex **3b** (125.76 MHz,  $\text{CDCl}_3$ )



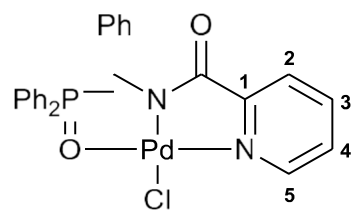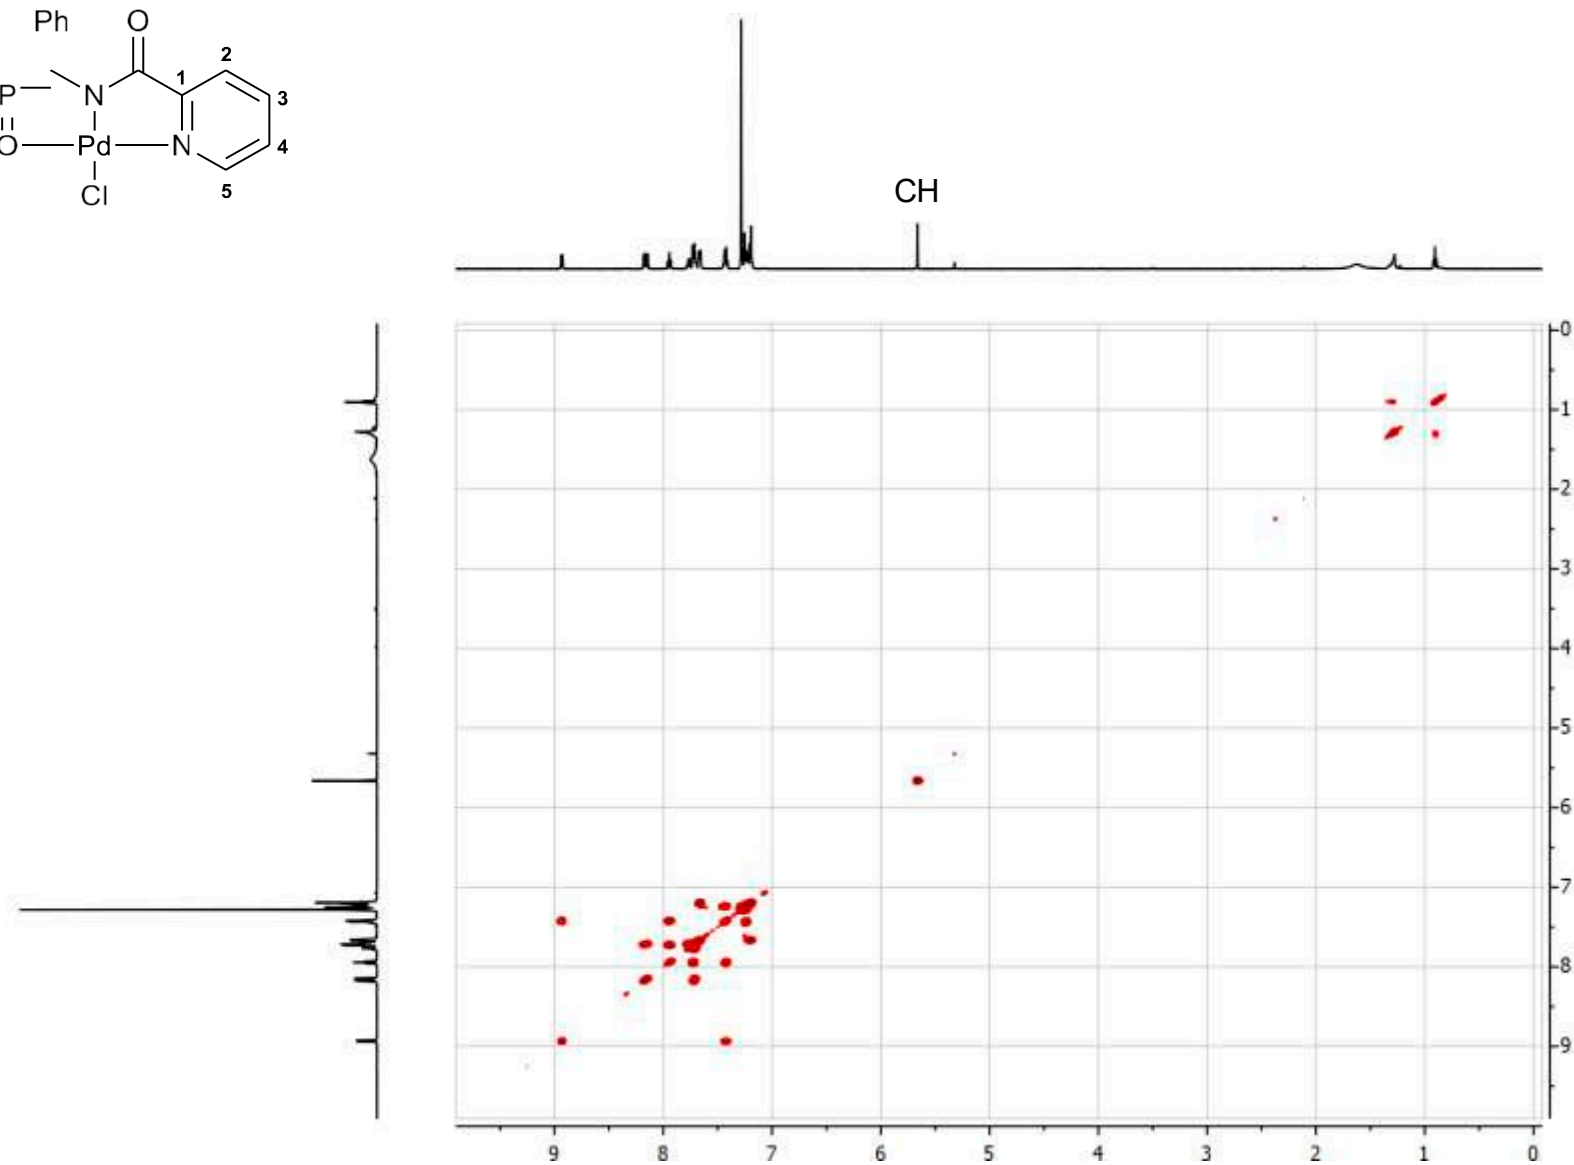

**Figure S29.** <sup>1</sup>H-<sup>1</sup>H COSY spectrum of complex **3b** (500.13 MHz, CDCl<sub>3</sub>)

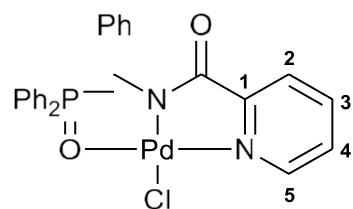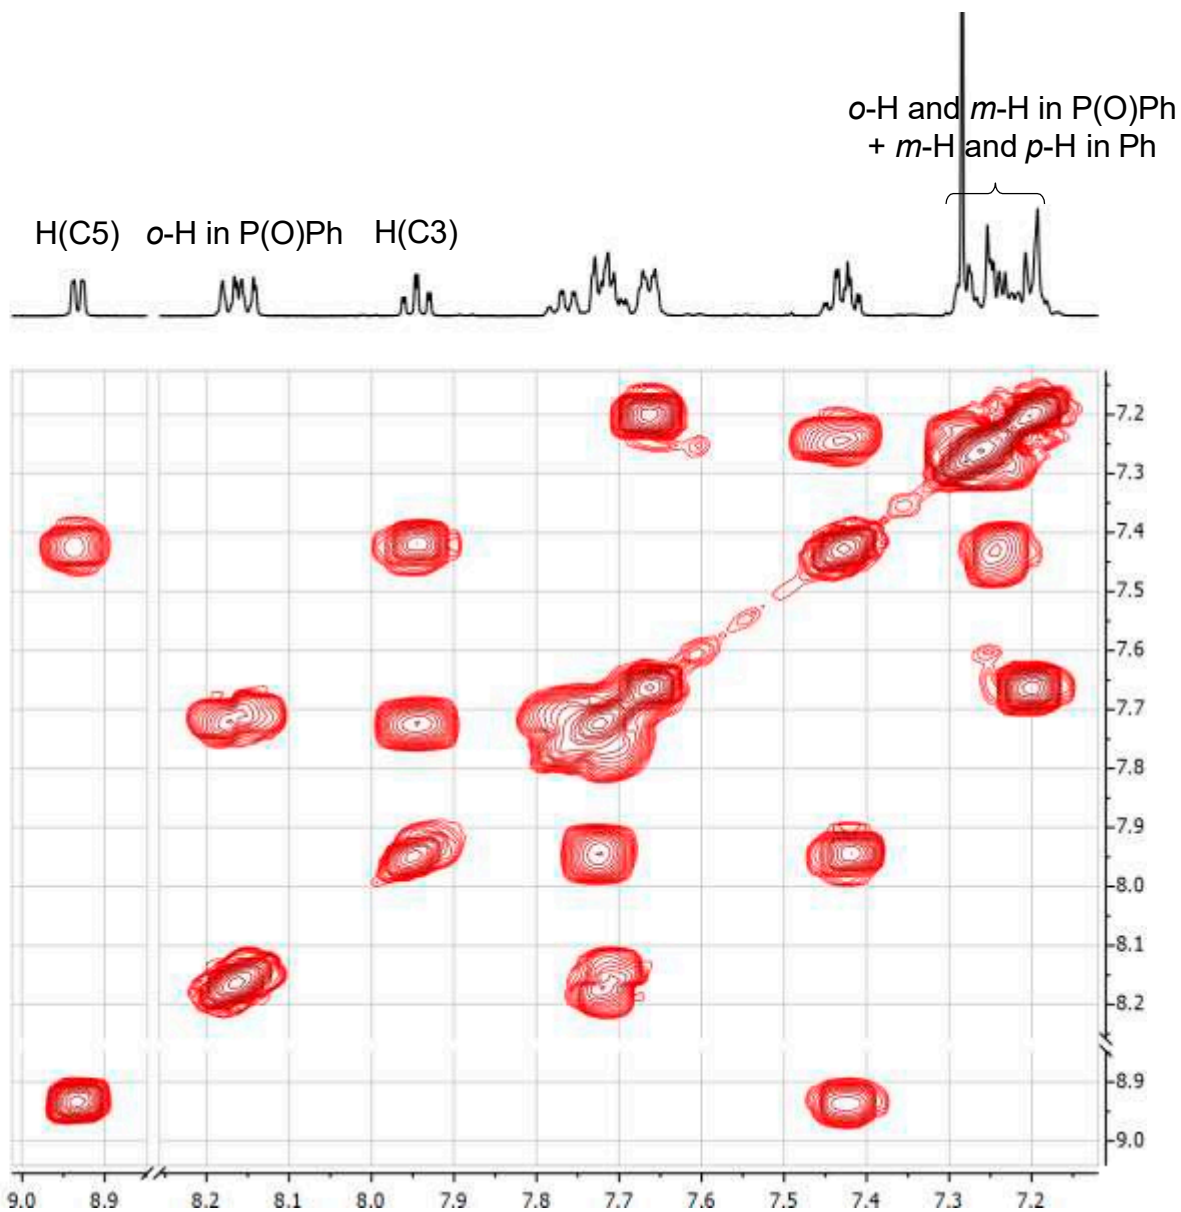

**Figure S30.** Extended fragments of the  $^1\text{H}$ - $^1\text{H}$  COSY spectrum of complex **3b** (500.13 MHz,  $\text{CDCl}_3$ ).

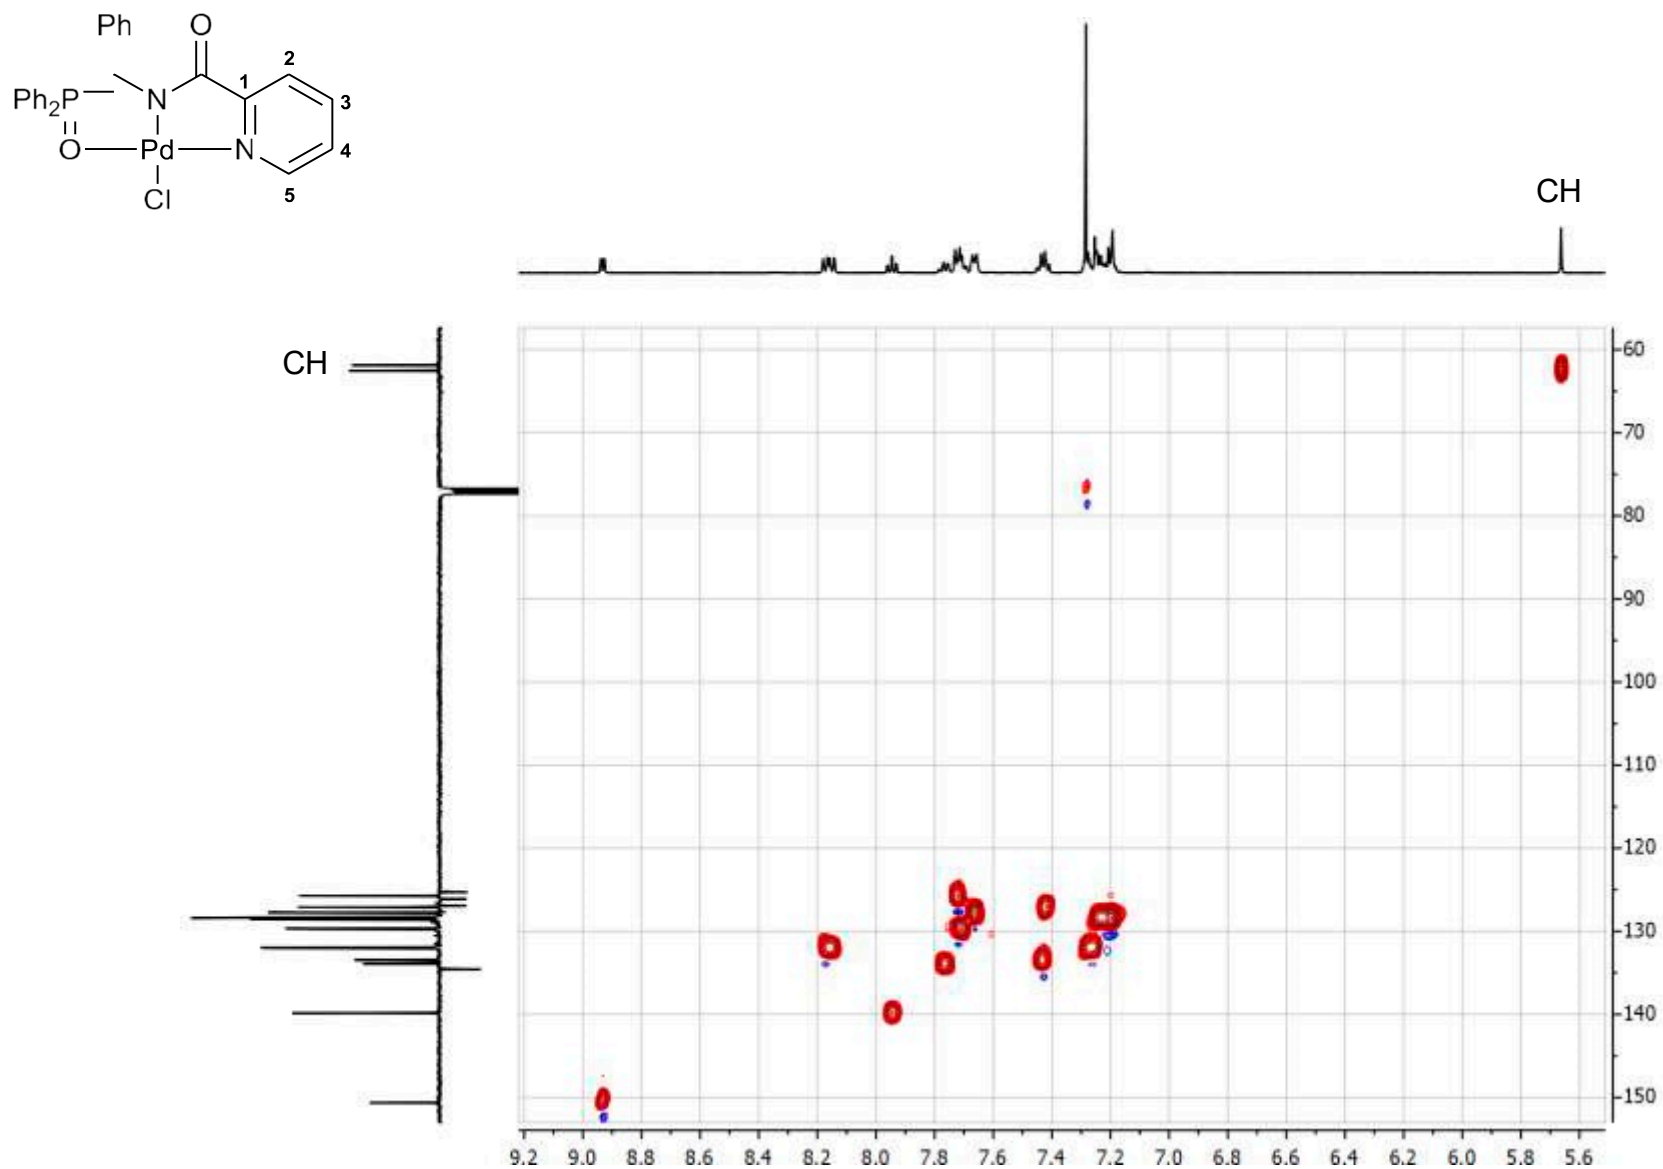

Figure S31. <sup>1</sup>H-<sup>13</sup>C HSQC spectrum of complex **3b** (CDCl<sub>3</sub>)

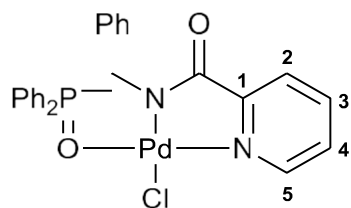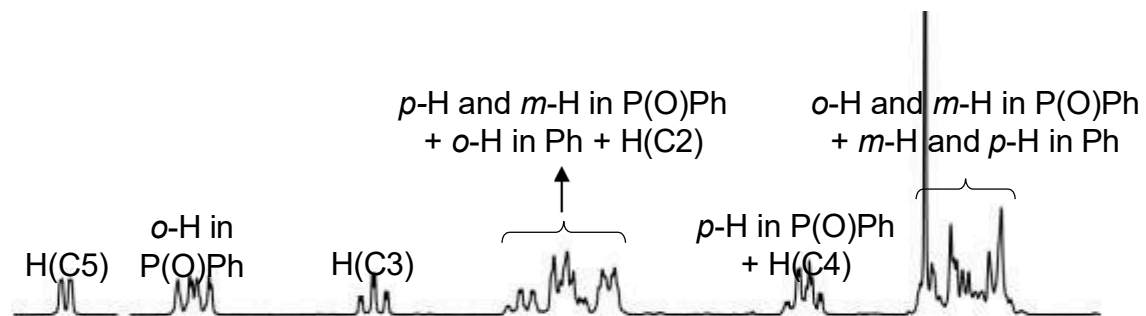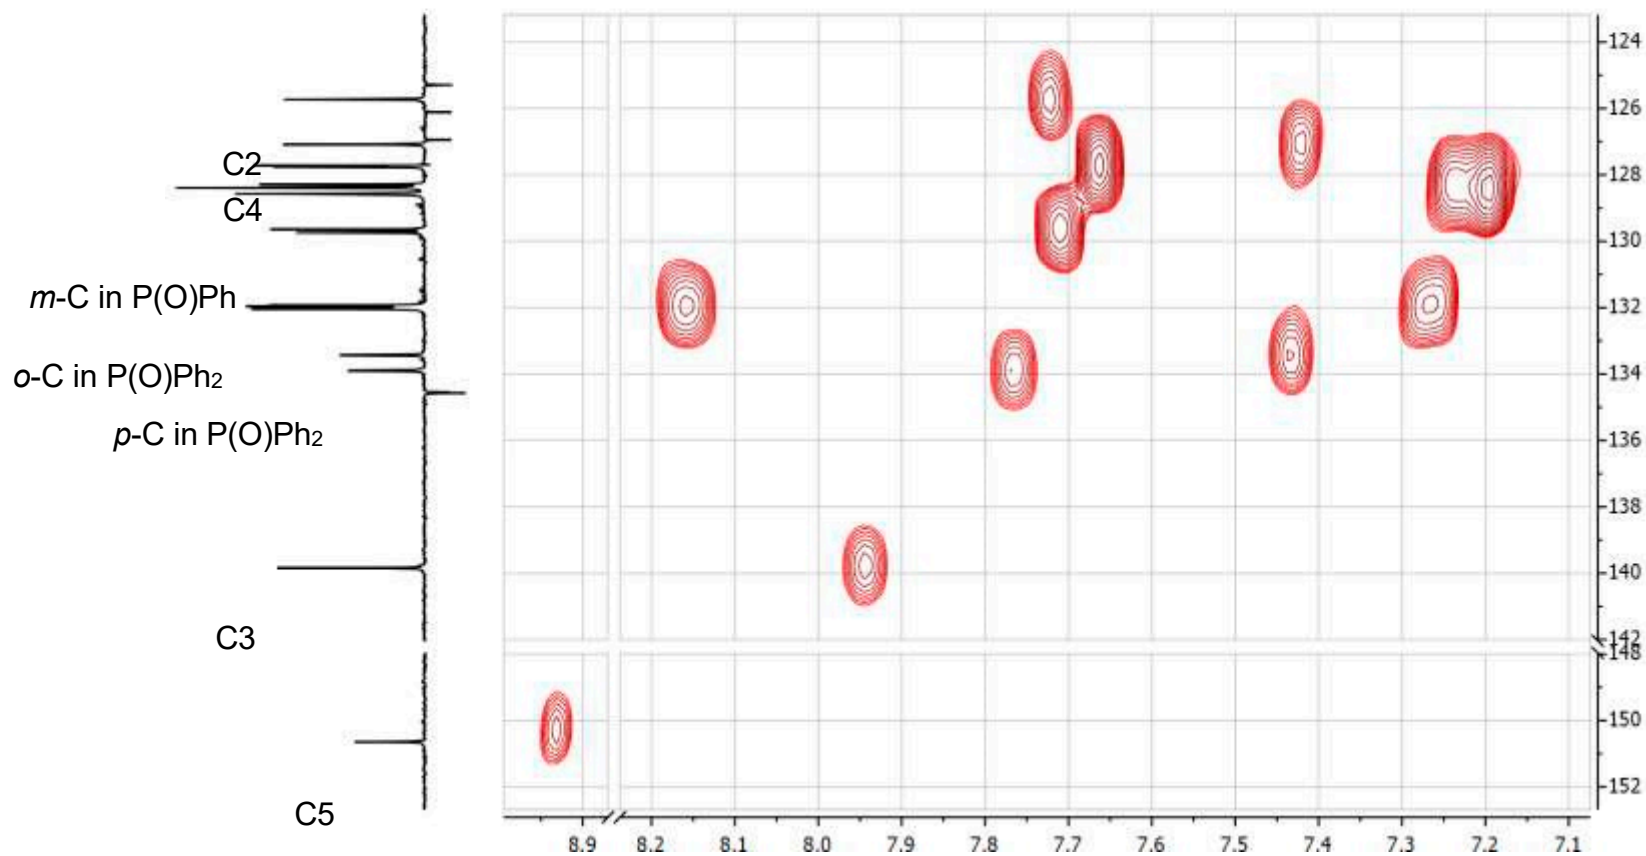

**Figure S32.** Extended fragments of the  $^1\text{H}$ - $^{13}\text{C}$  HSQC spectrum of complex **3b** ( $\text{CDCl}_3$ )

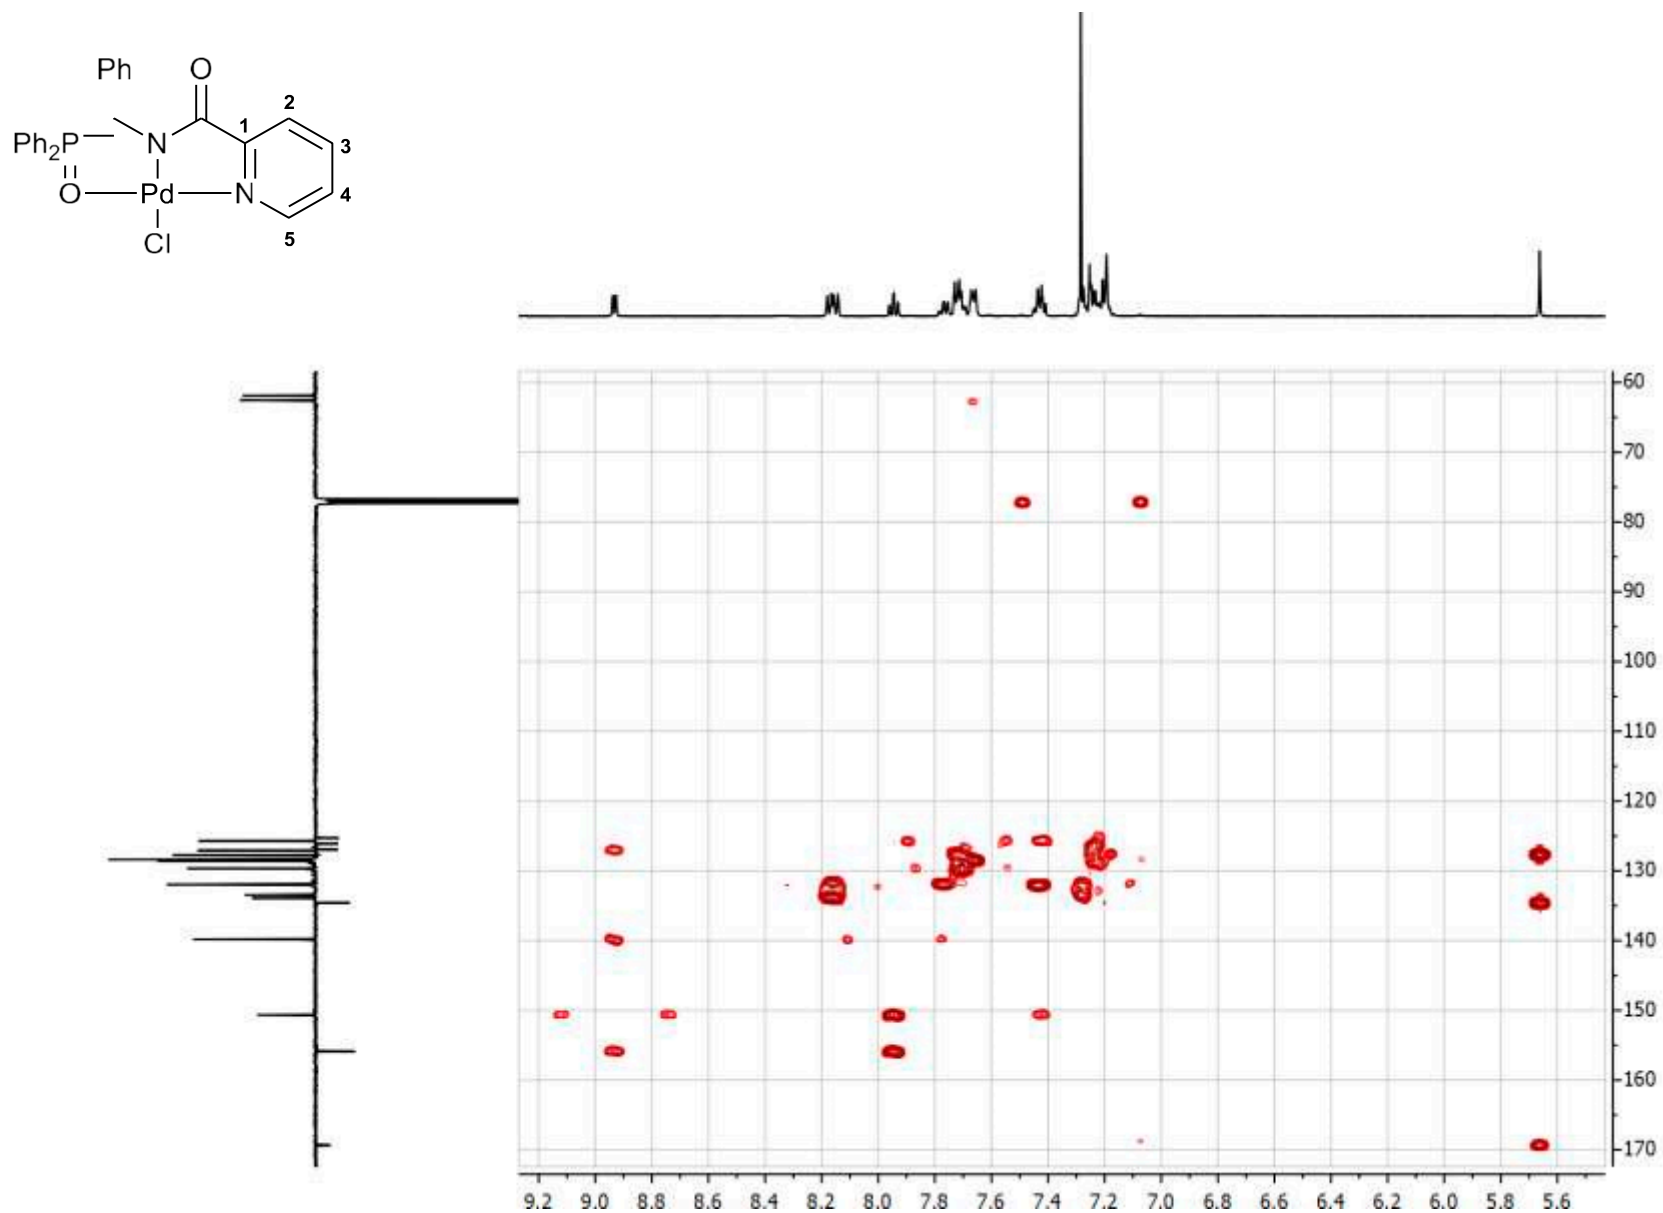

Figure S33.  $^1\text{H}$ - $^{13}\text{C}$  HMBC spectrum of complex **3b** ( $\text{CDCl}_3$ )

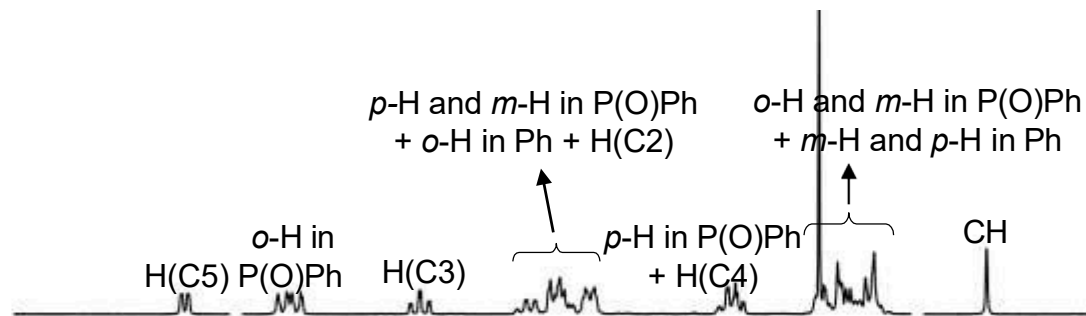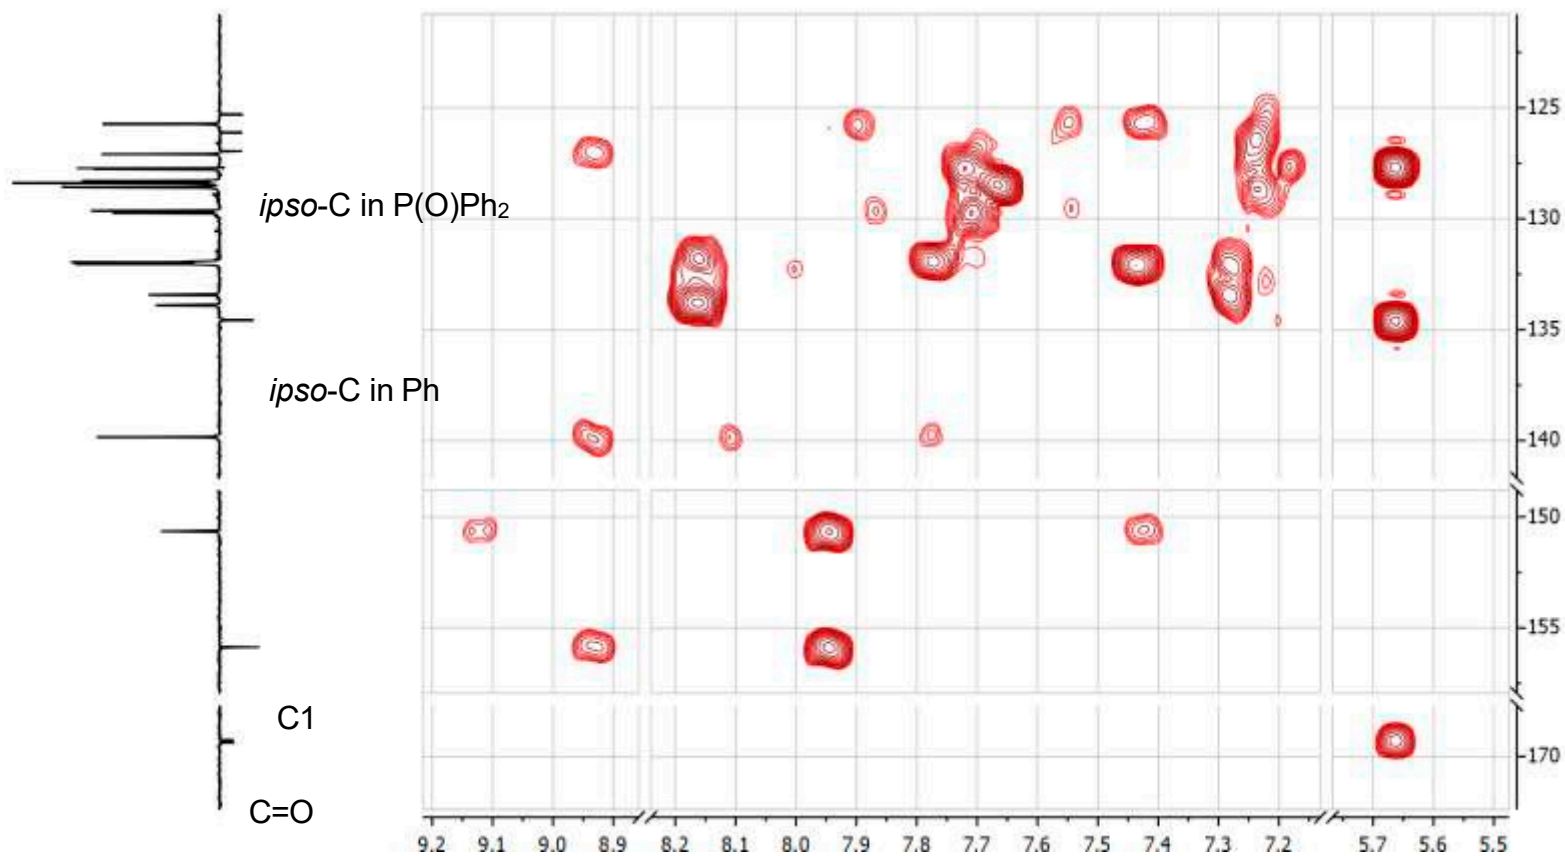

**Figure S34.** Extended fragments of the  $^1\text{H}$ - $^{13}\text{C}$  HMBC spectrum of complex **3b** ( $\text{CDCl}_3$ )



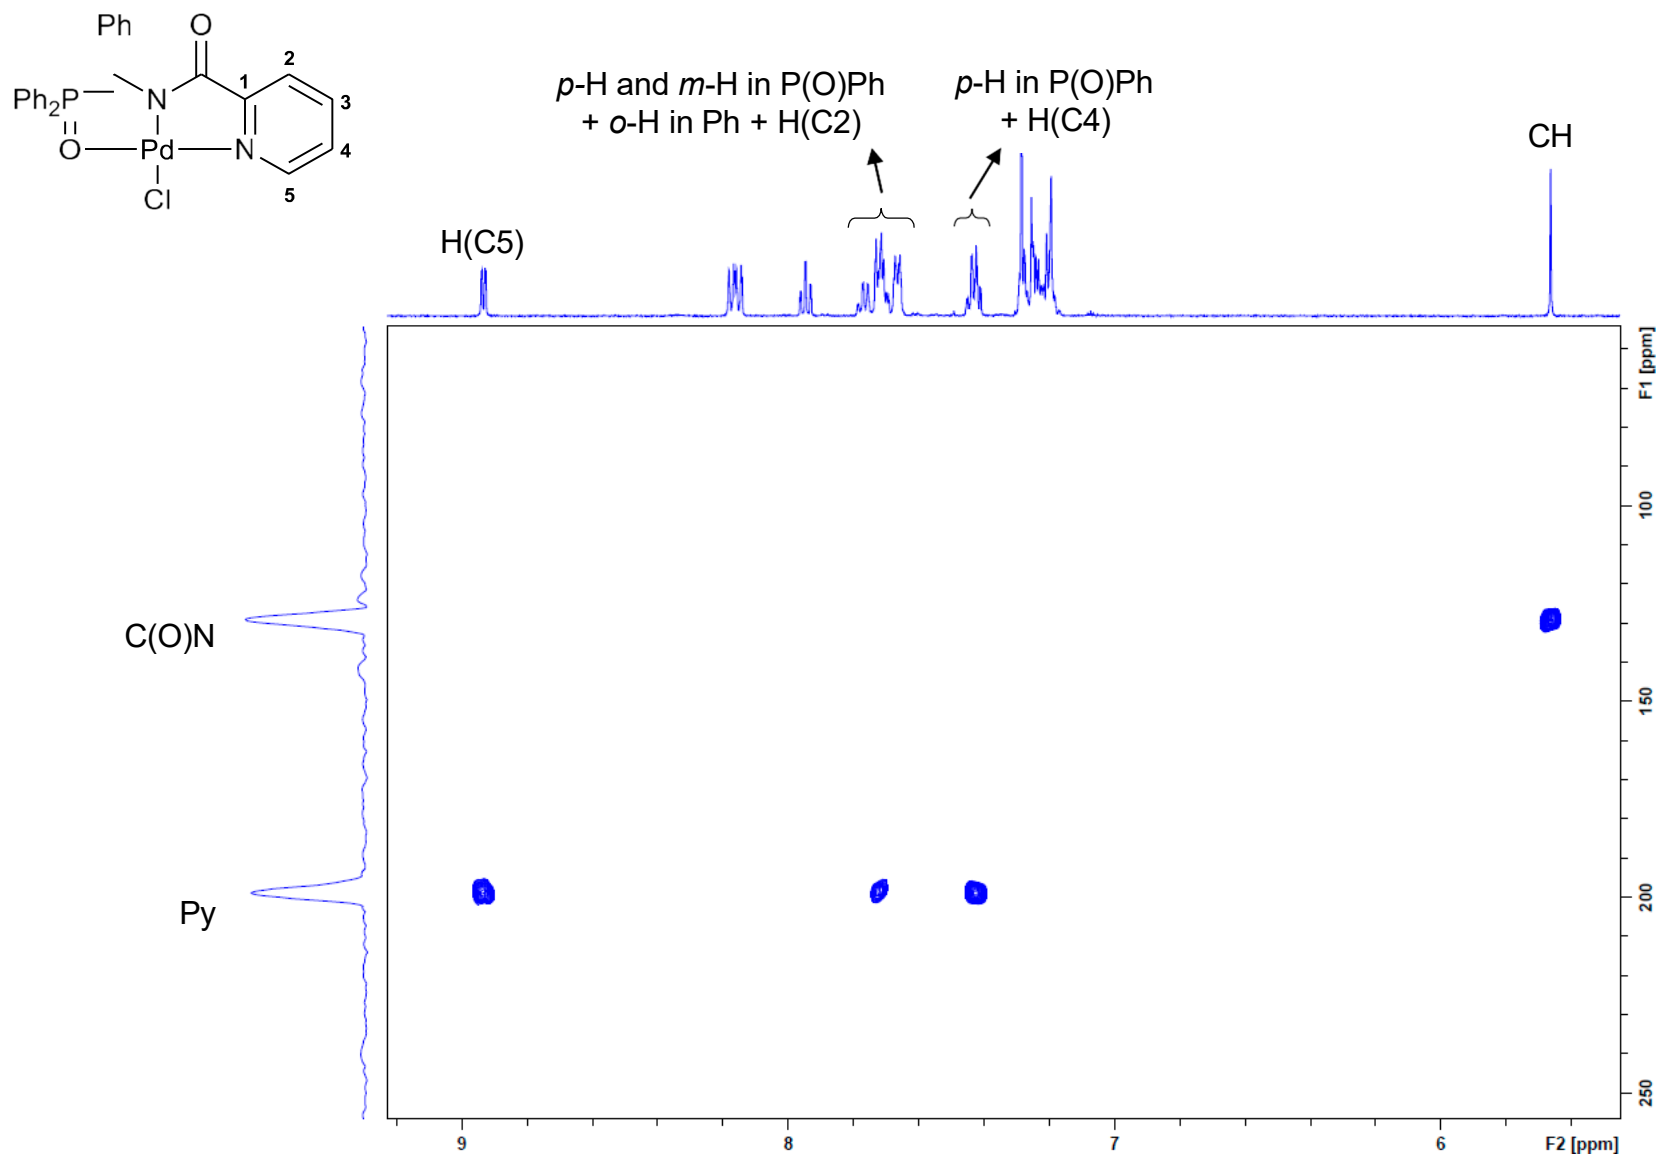

Figure S35. <sup>1</sup>H-<sup>15</sup>N HMBC spectrum of complex **3b** (CDCl<sub>3</sub>)

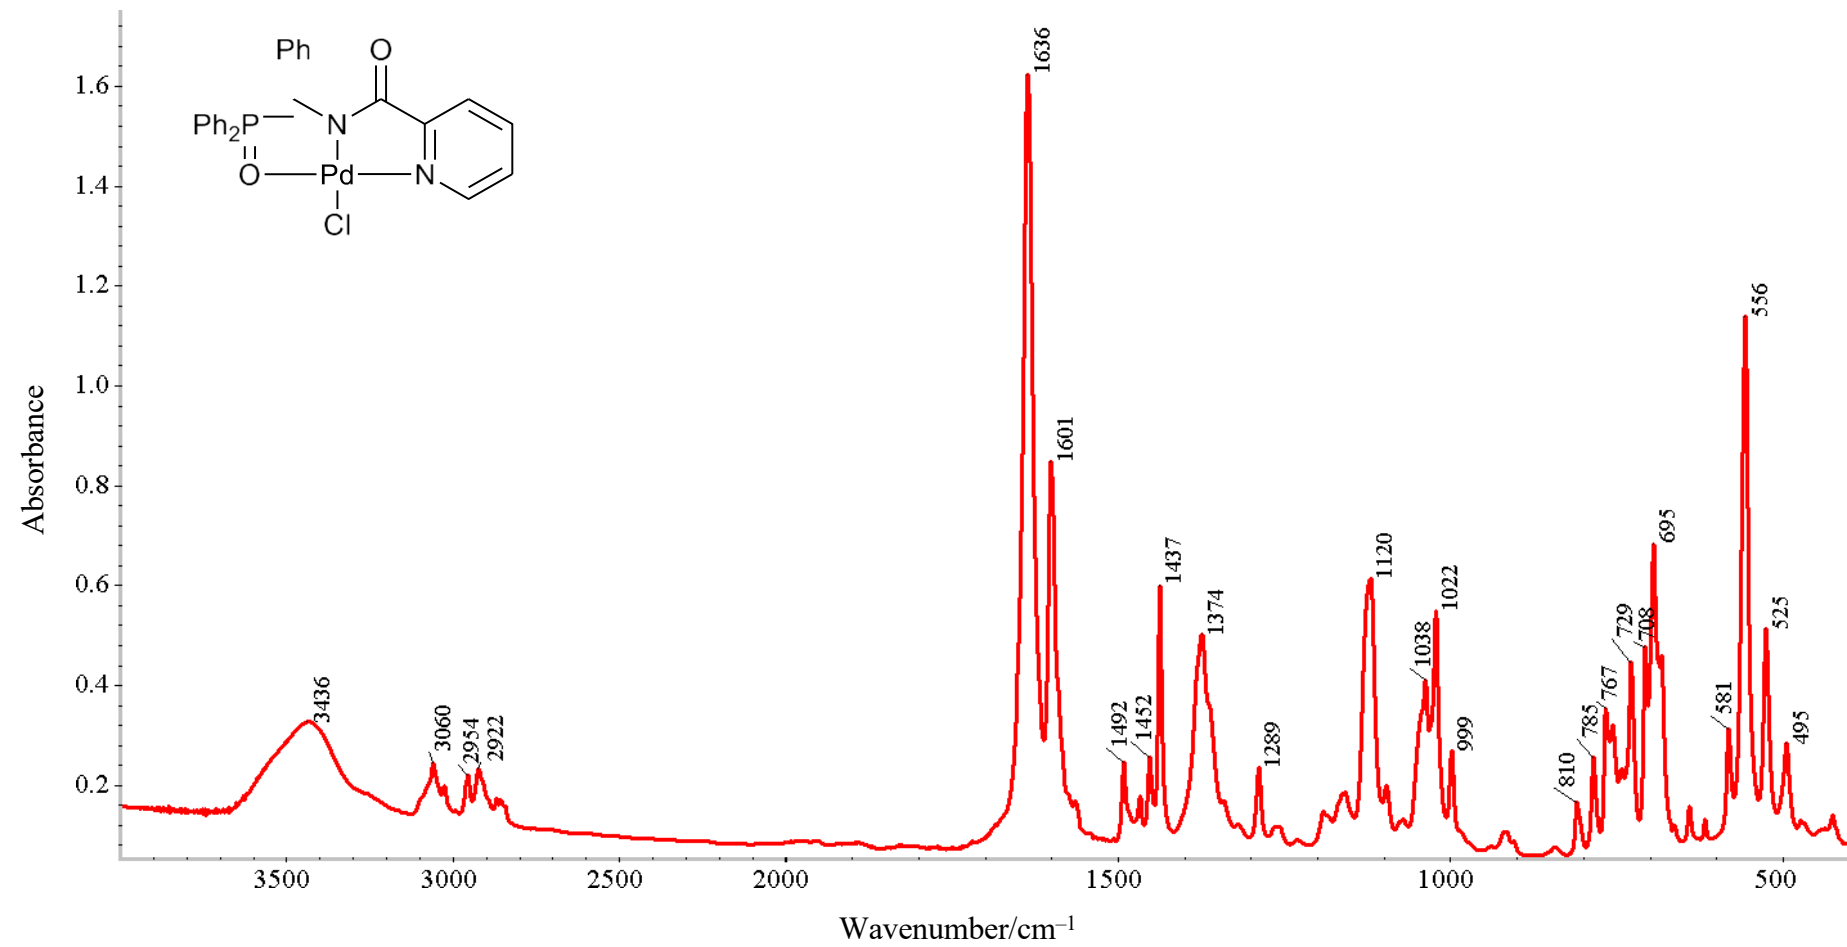

Figure S36. IR spectrum of complex **3b**

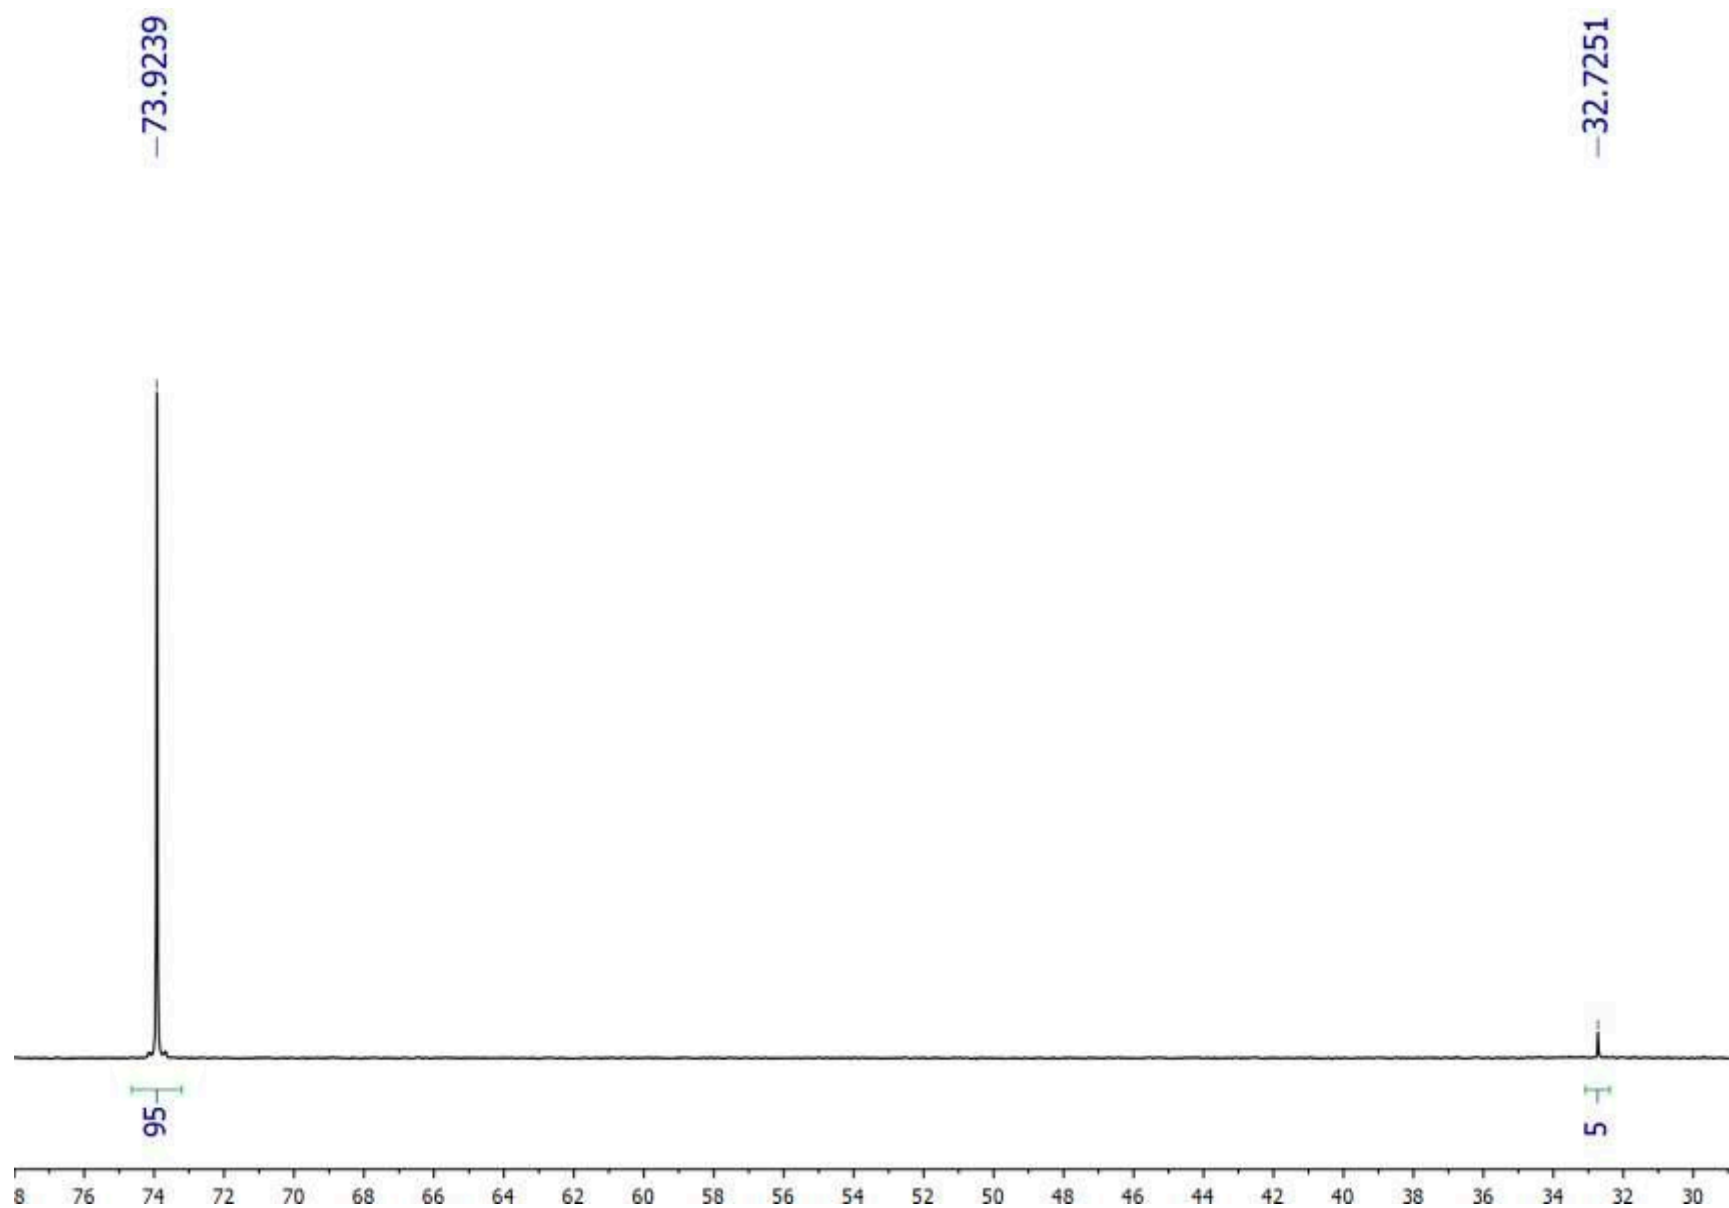

Figure S37.  $^{31}\text{P}\{^1\text{H}\}$  NMR spectrum of a solution of complex **2b** in  $\text{CDCl}_3$  (202.45 MHz)

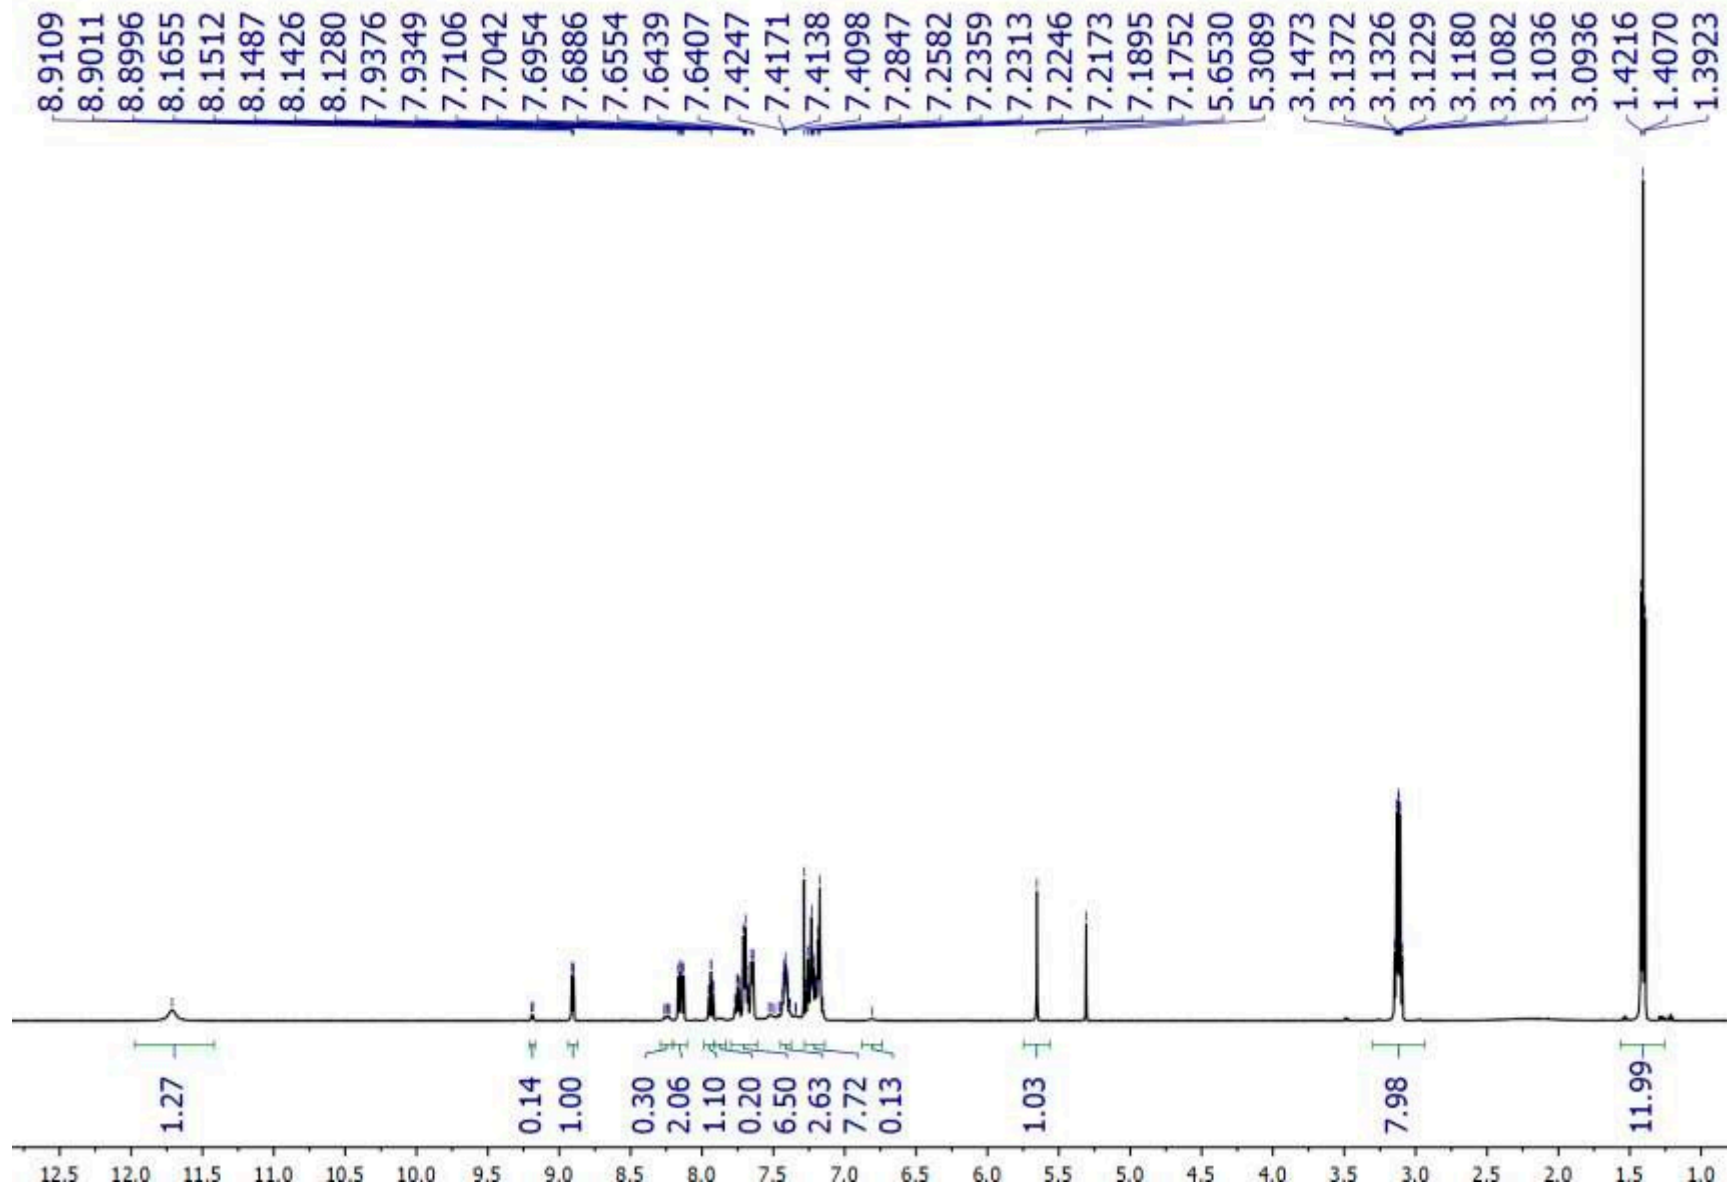

Figure S38. <sup>1</sup>H NMR spectrum of a solution of complex **2b** in CDCl<sub>3</sub> (500.13 MHz)

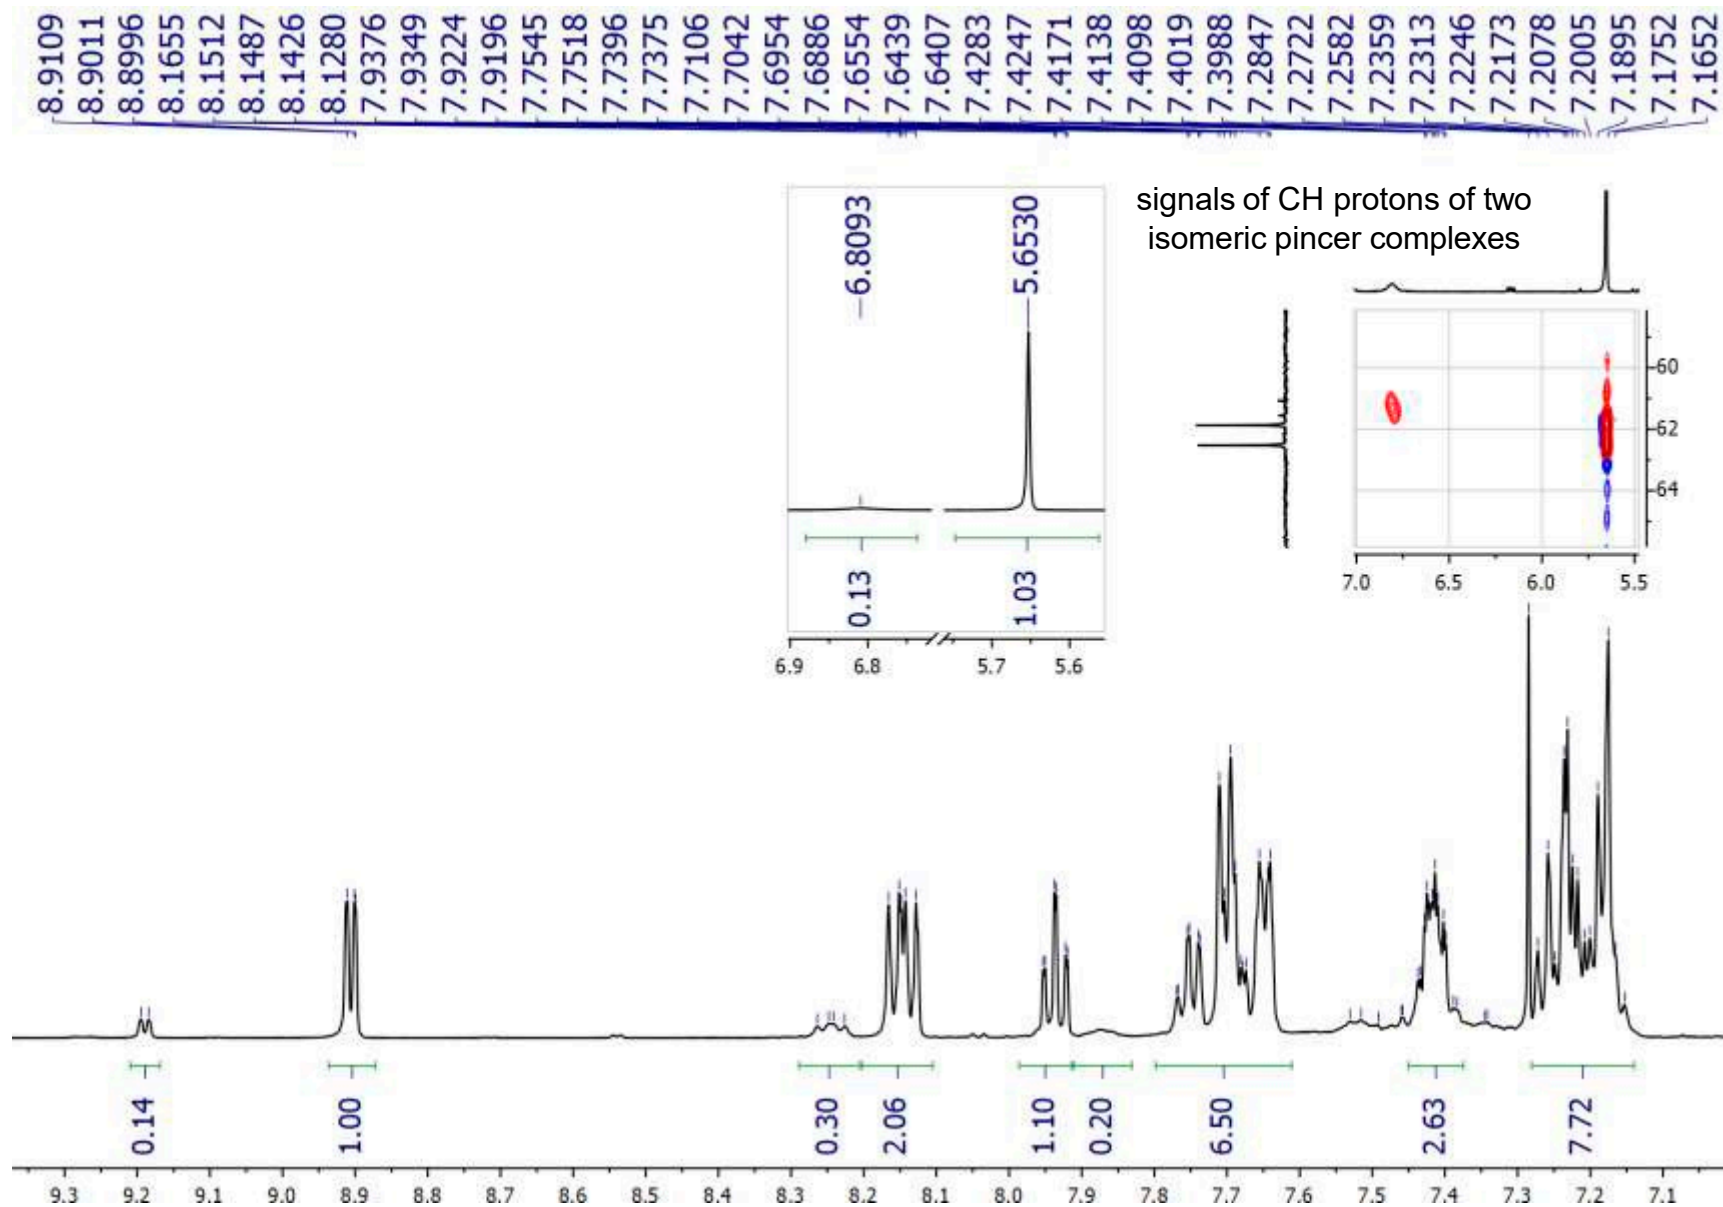

**Figure S39.** Extended fragments of the  $^1\text{H}$  NMR and  $^1\text{H}$ - $^{13}\text{C}$  HSQC spectra of a solution of complex **2b** in  $\text{CDCl}_3$

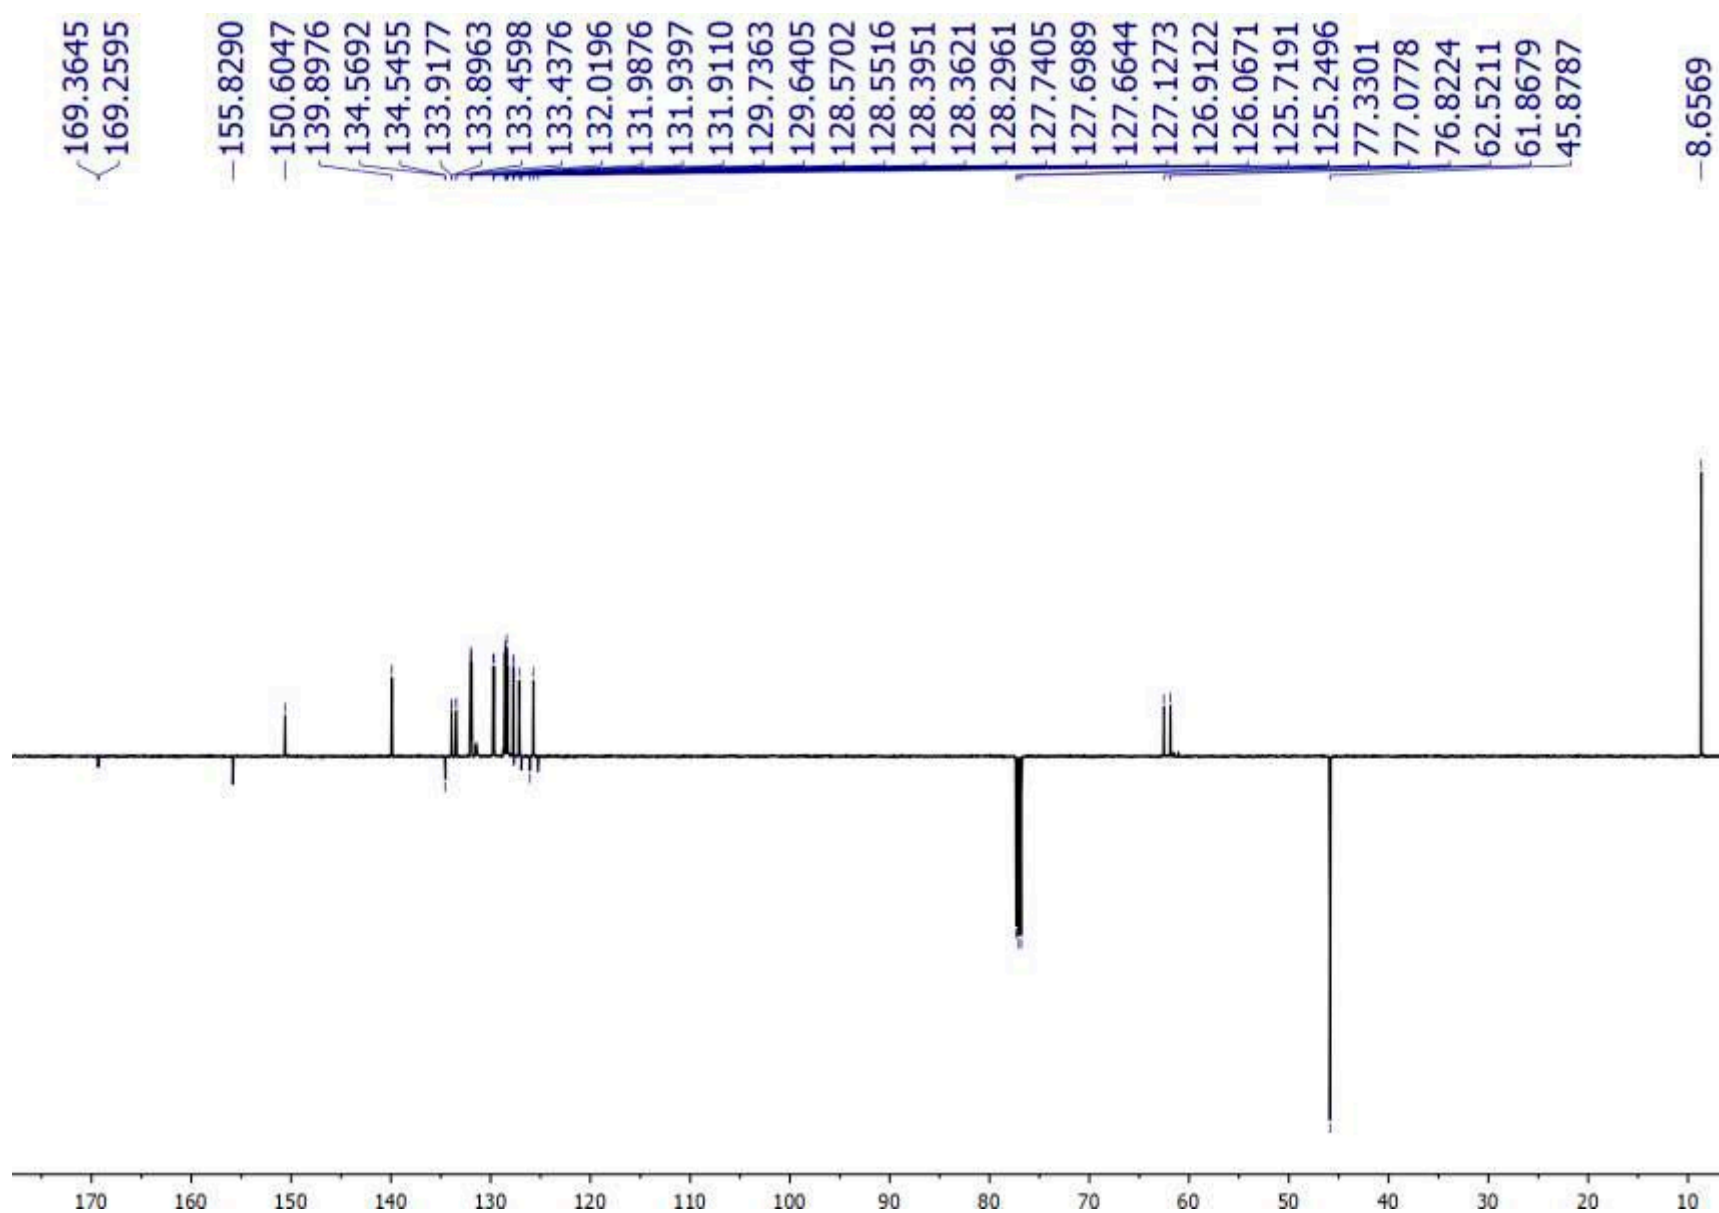

Figure S40.  $^{13}\text{C}\{^1\text{H}\}$  NMR spectrum of a solution of complex **2b** in  $\text{CDCl}_3$  (125.76 MHz)



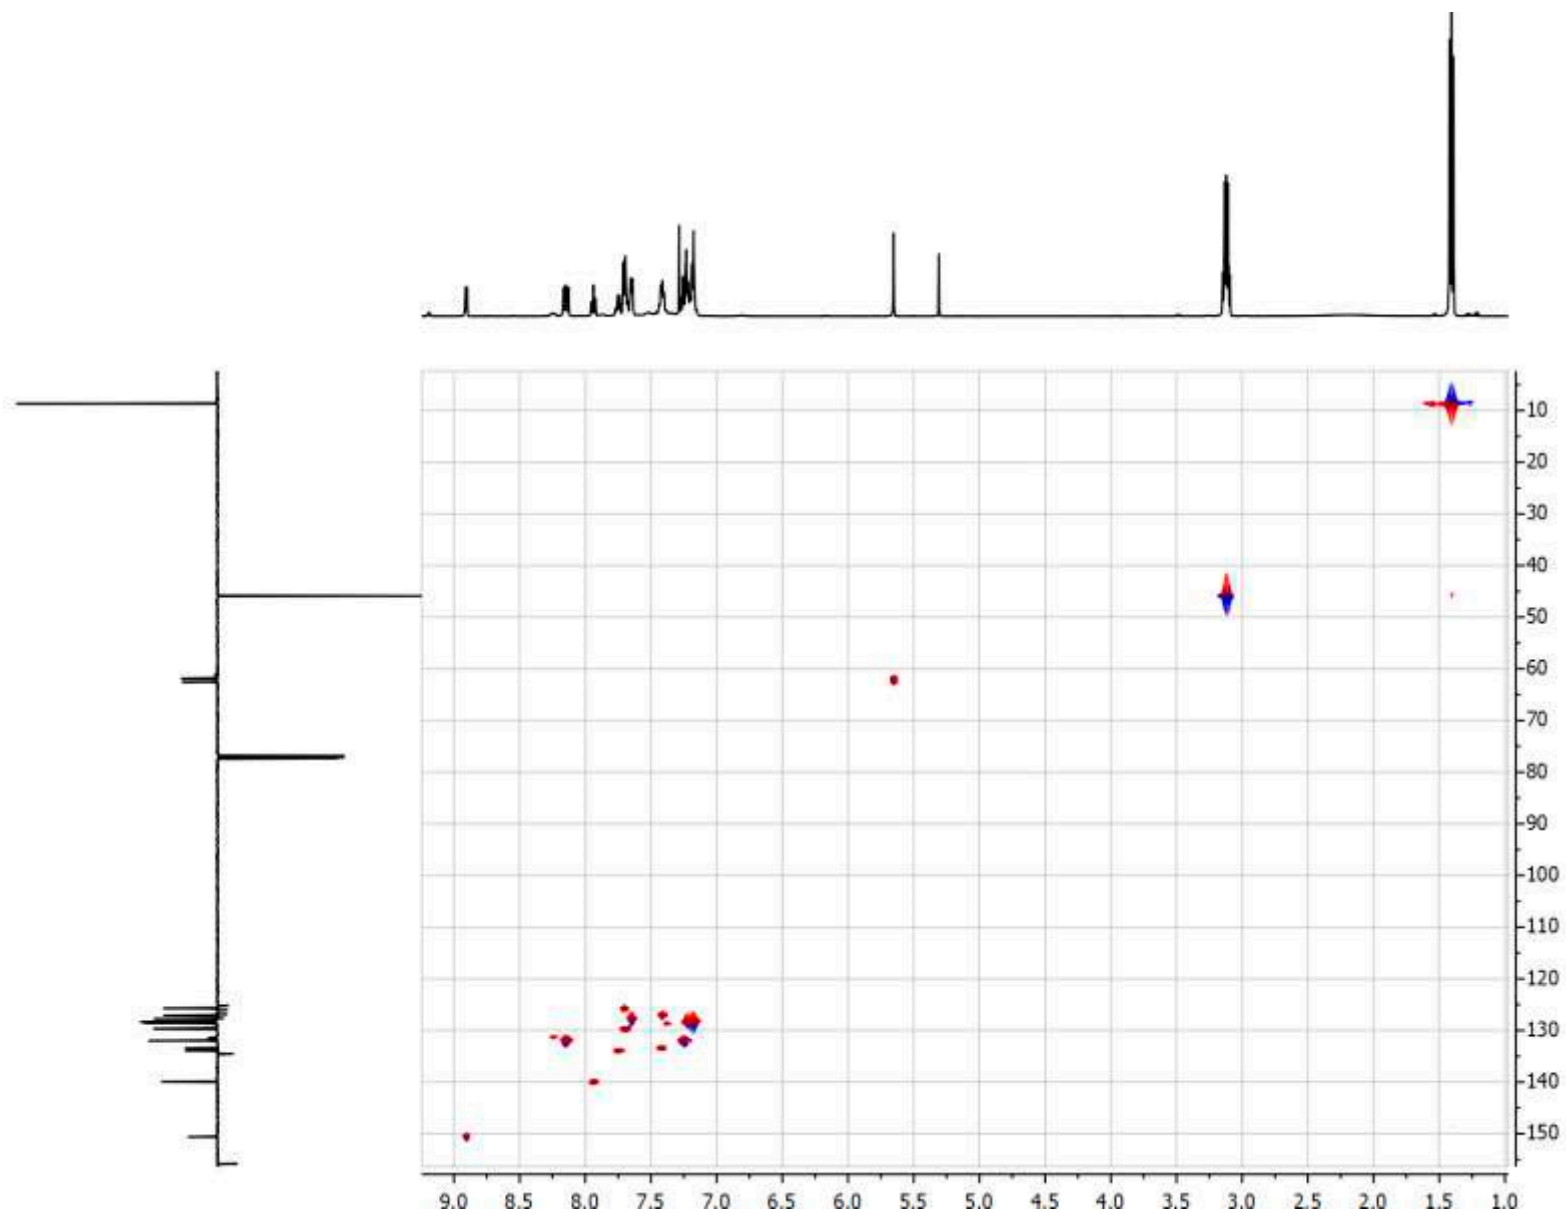

Figure S42.  $^1\text{H}$ - $^{13}\text{C}$  HSQC spectrum of a solution of complex **2b** in  $\text{CDCl}_3$



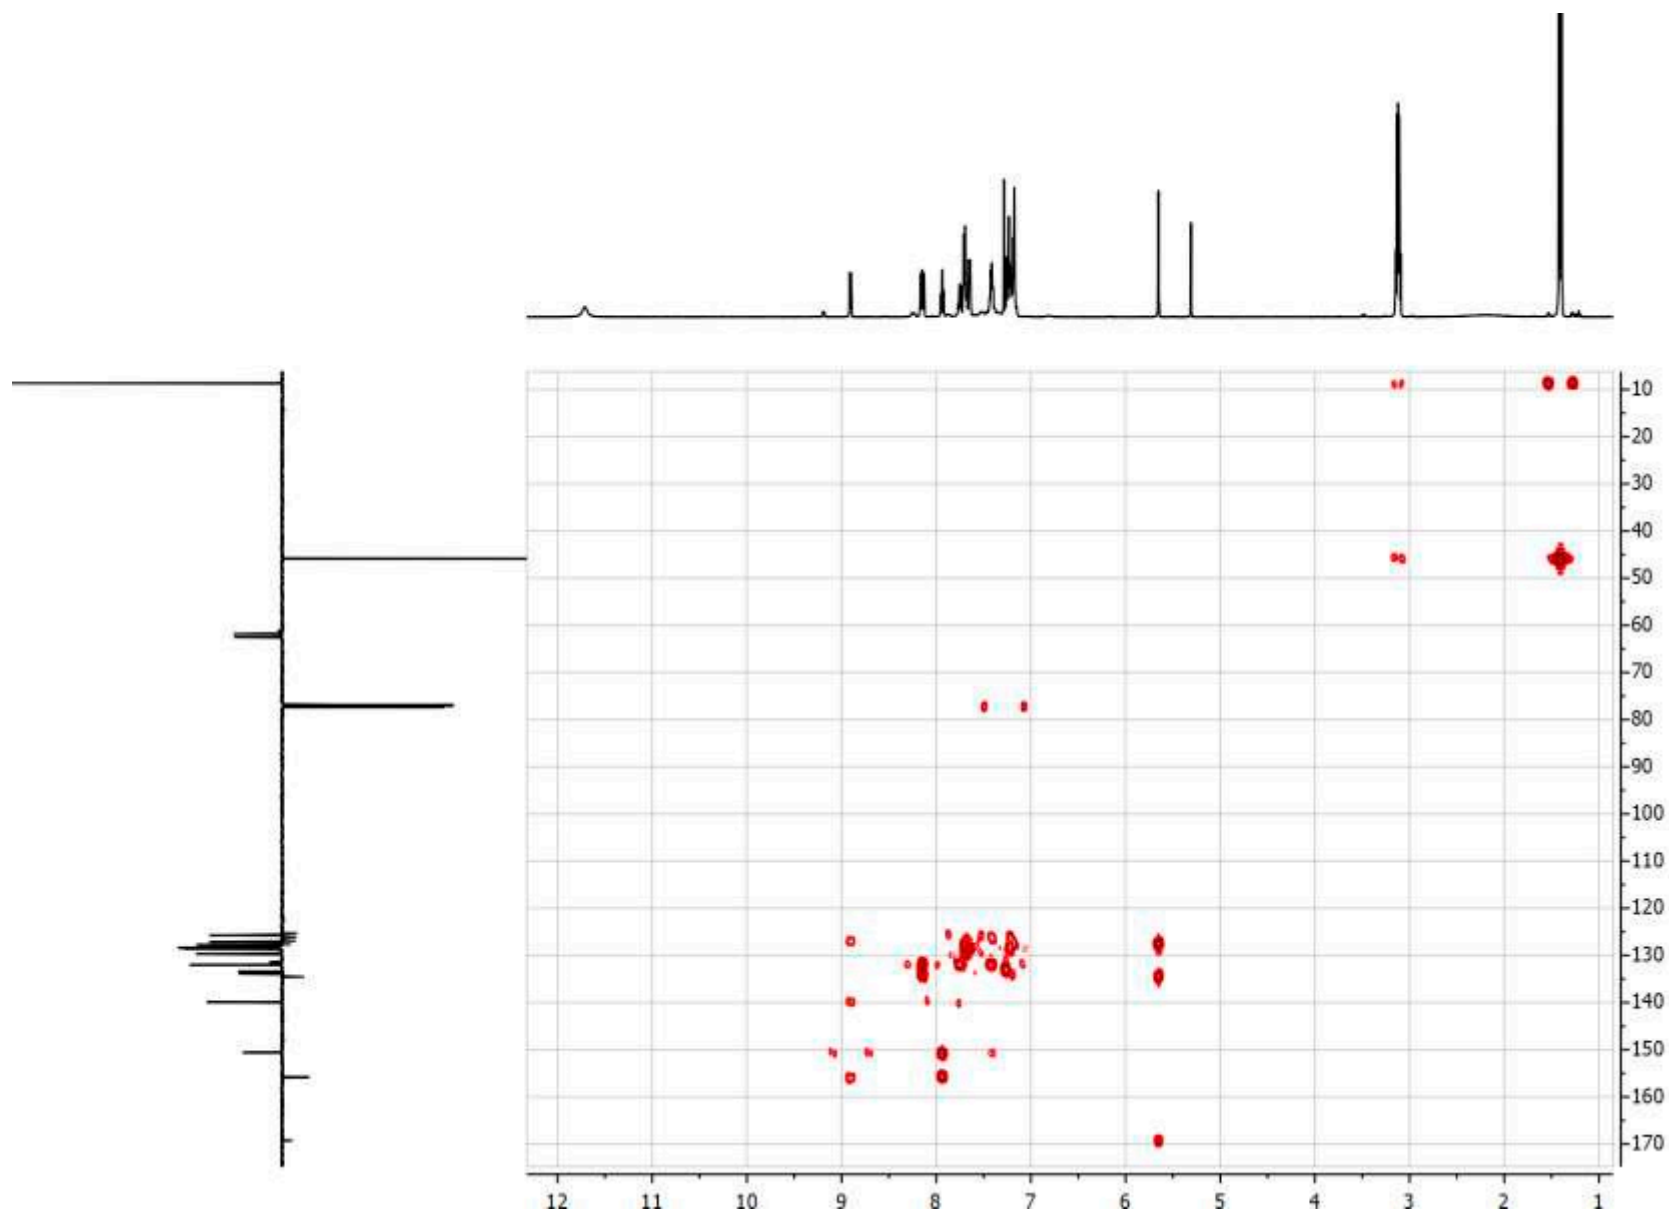

Figure S43.  $^1\text{H}$ - $^{13}\text{C}$  HMBC spectrum of a solution of complex **2b** in  $\text{CDCl}_3$

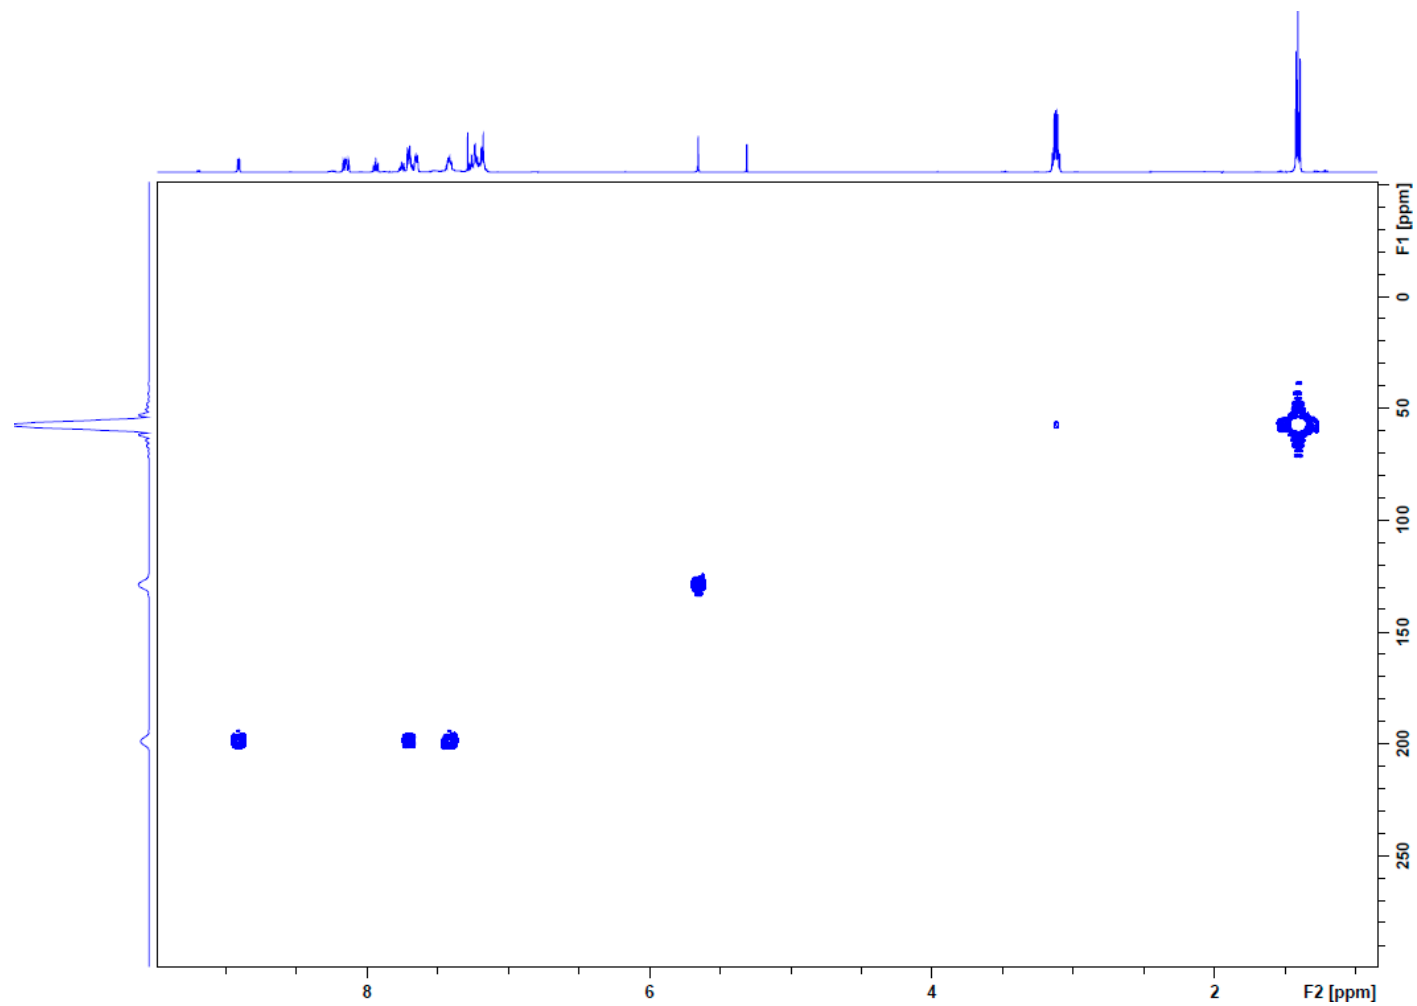

**Figure S44.**  $^1\text{H}$ - $^{15}\text{N}$  HMBC spectrum of a solution of complex **2b** in  $\text{CDCl}_3$

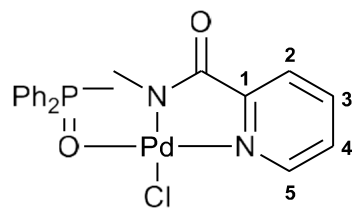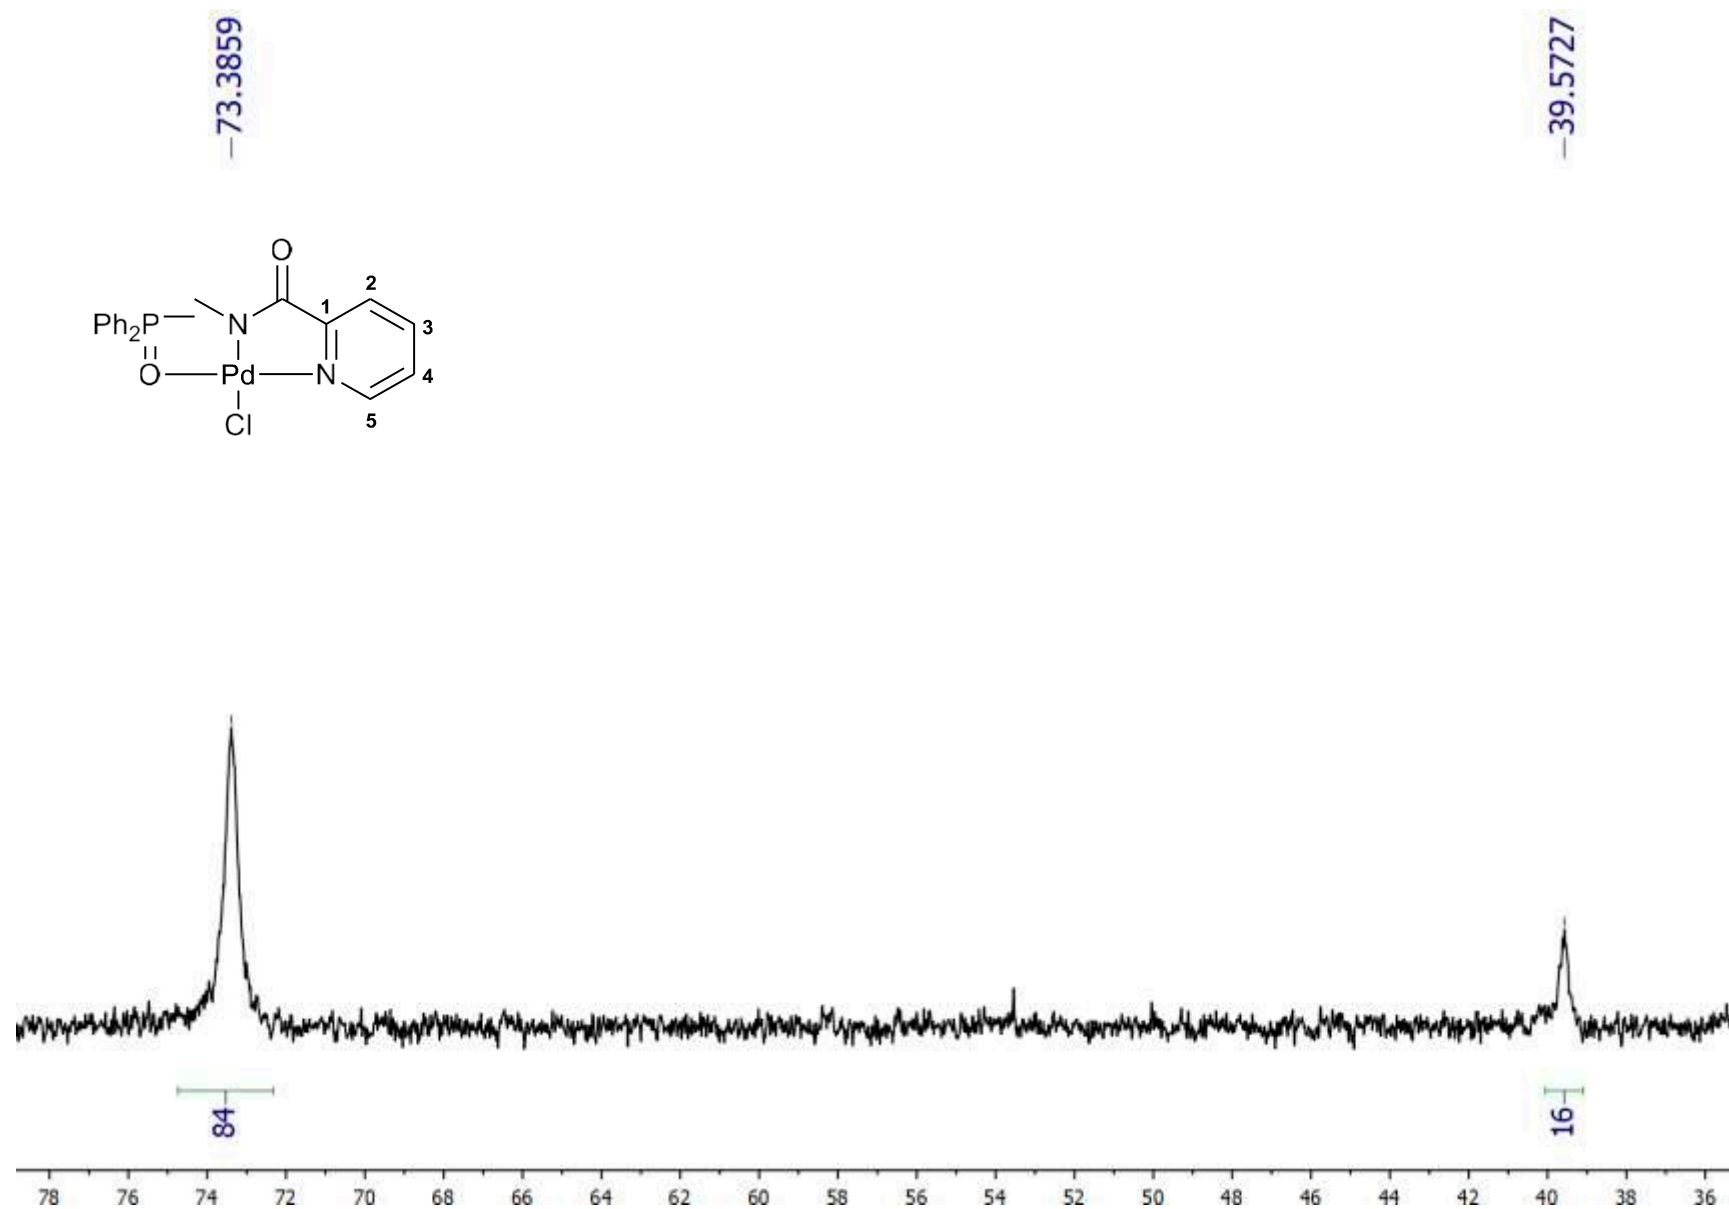

Figure S45.  $^{31}\text{P}\{^1\text{H}\}$  NMR spectrum of complex **3a** (161.98 MHz,  $\text{CDCl}_3$ )

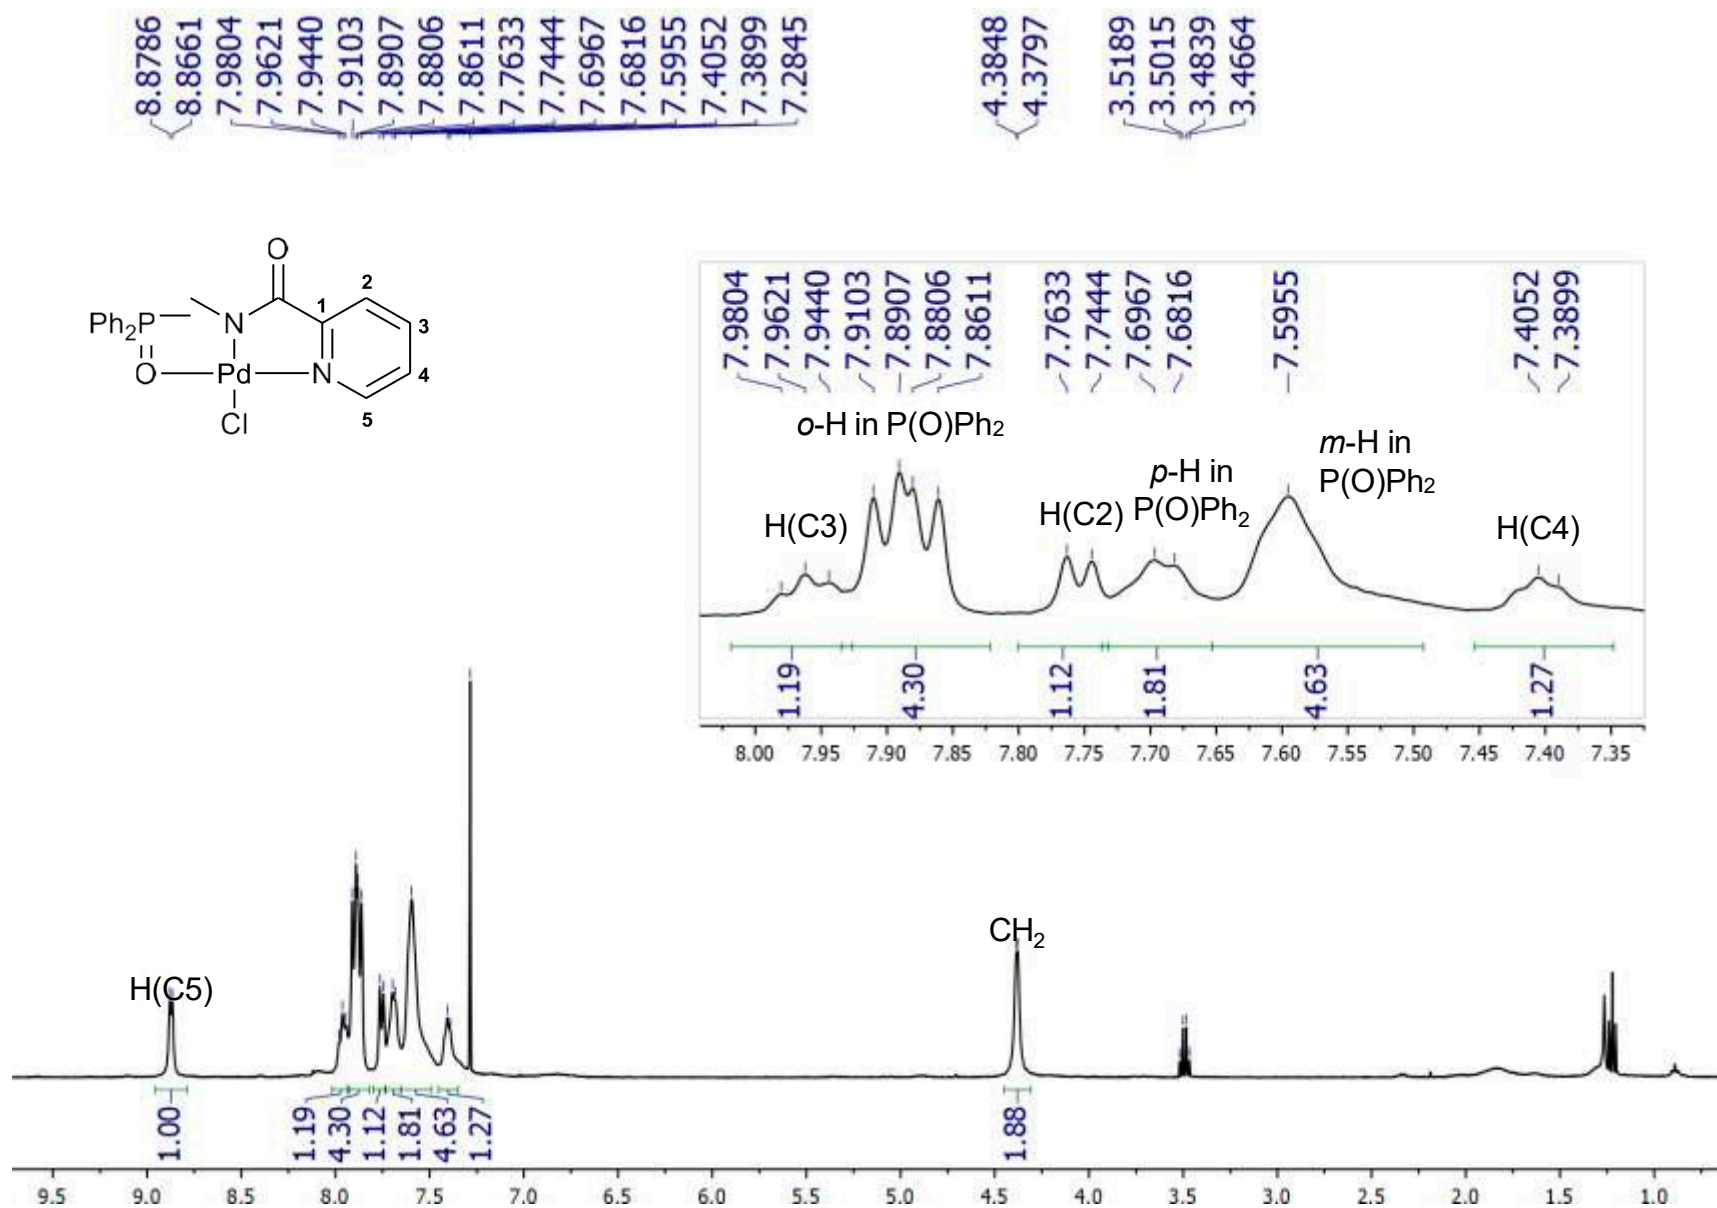

**Figure S46.** <sup>1</sup>H NMR spectrum of complex **3a** (400.13 MHz, CDCl<sub>3</sub>)

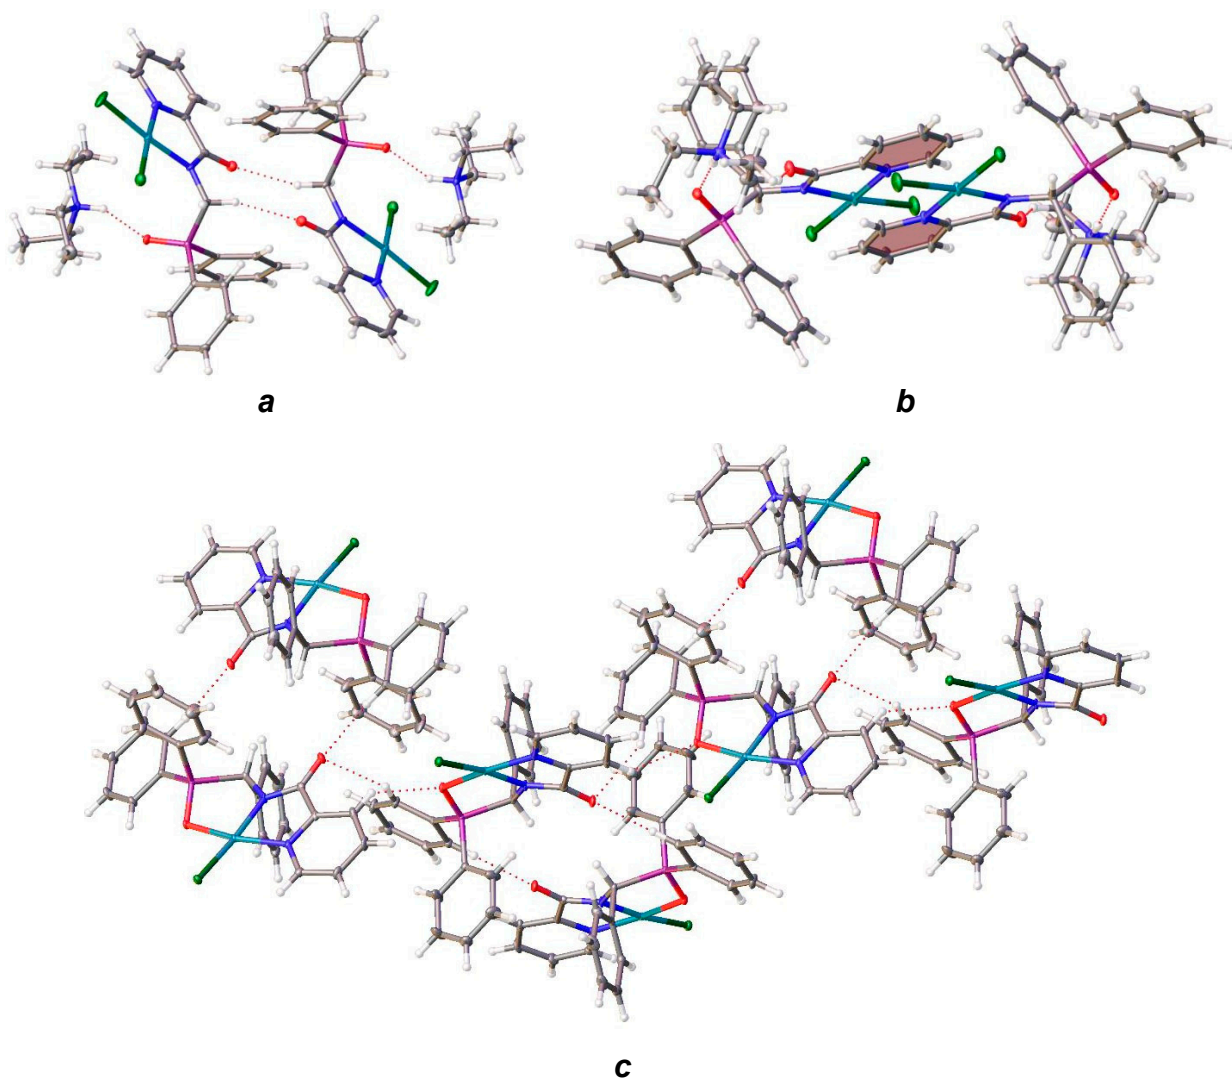

**Figure S47.** Fragments of the crystal packing of complexes 2a (*a*), 2b (*b*) and 3b (*c*)

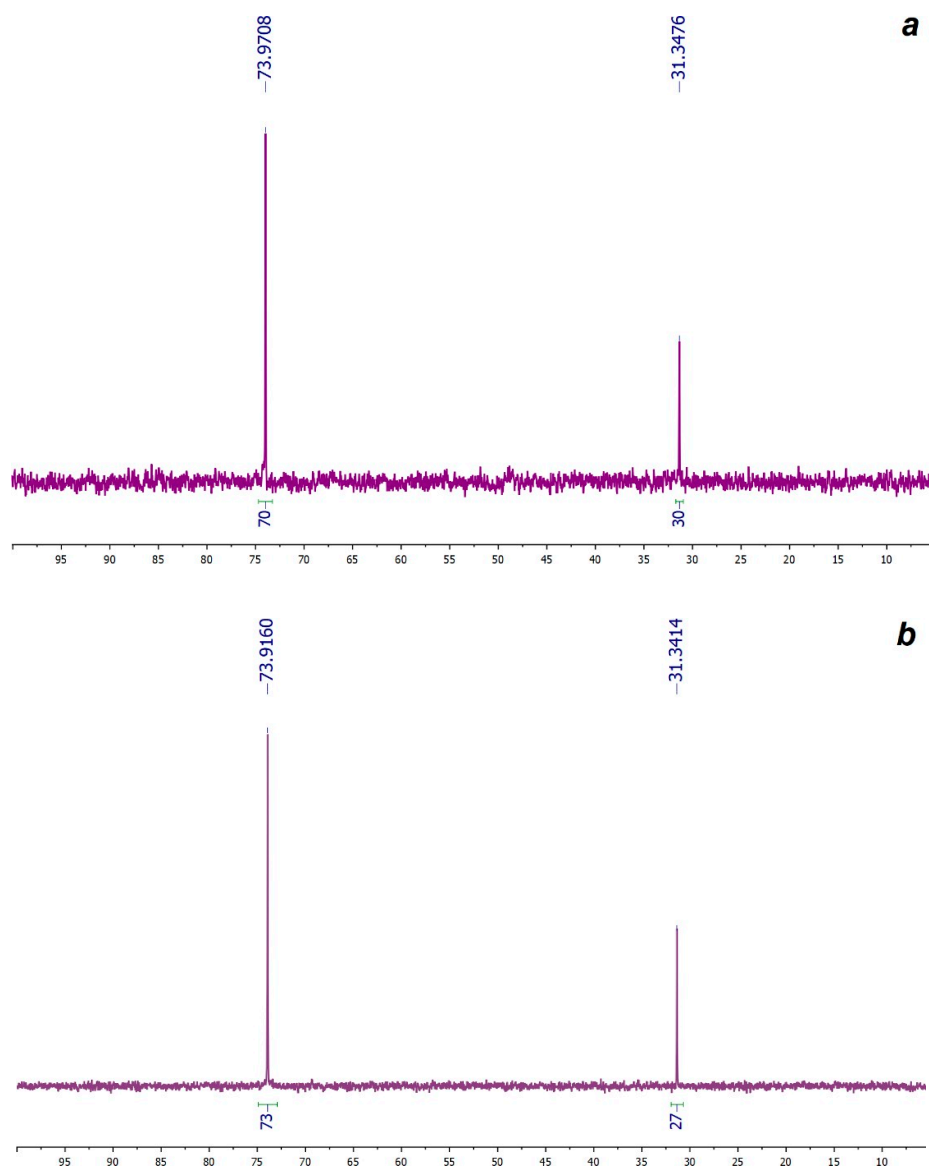

**Figure S48.**  $^{31}\text{P}\{^1\text{H}\}$  NMR spectra of complex **2b** in  $\text{CDCl}_3$ – $(\text{CD}_3)_2\text{SO}$  registered in 3 h (*a*) and 3 days (*b*) after dissolution.

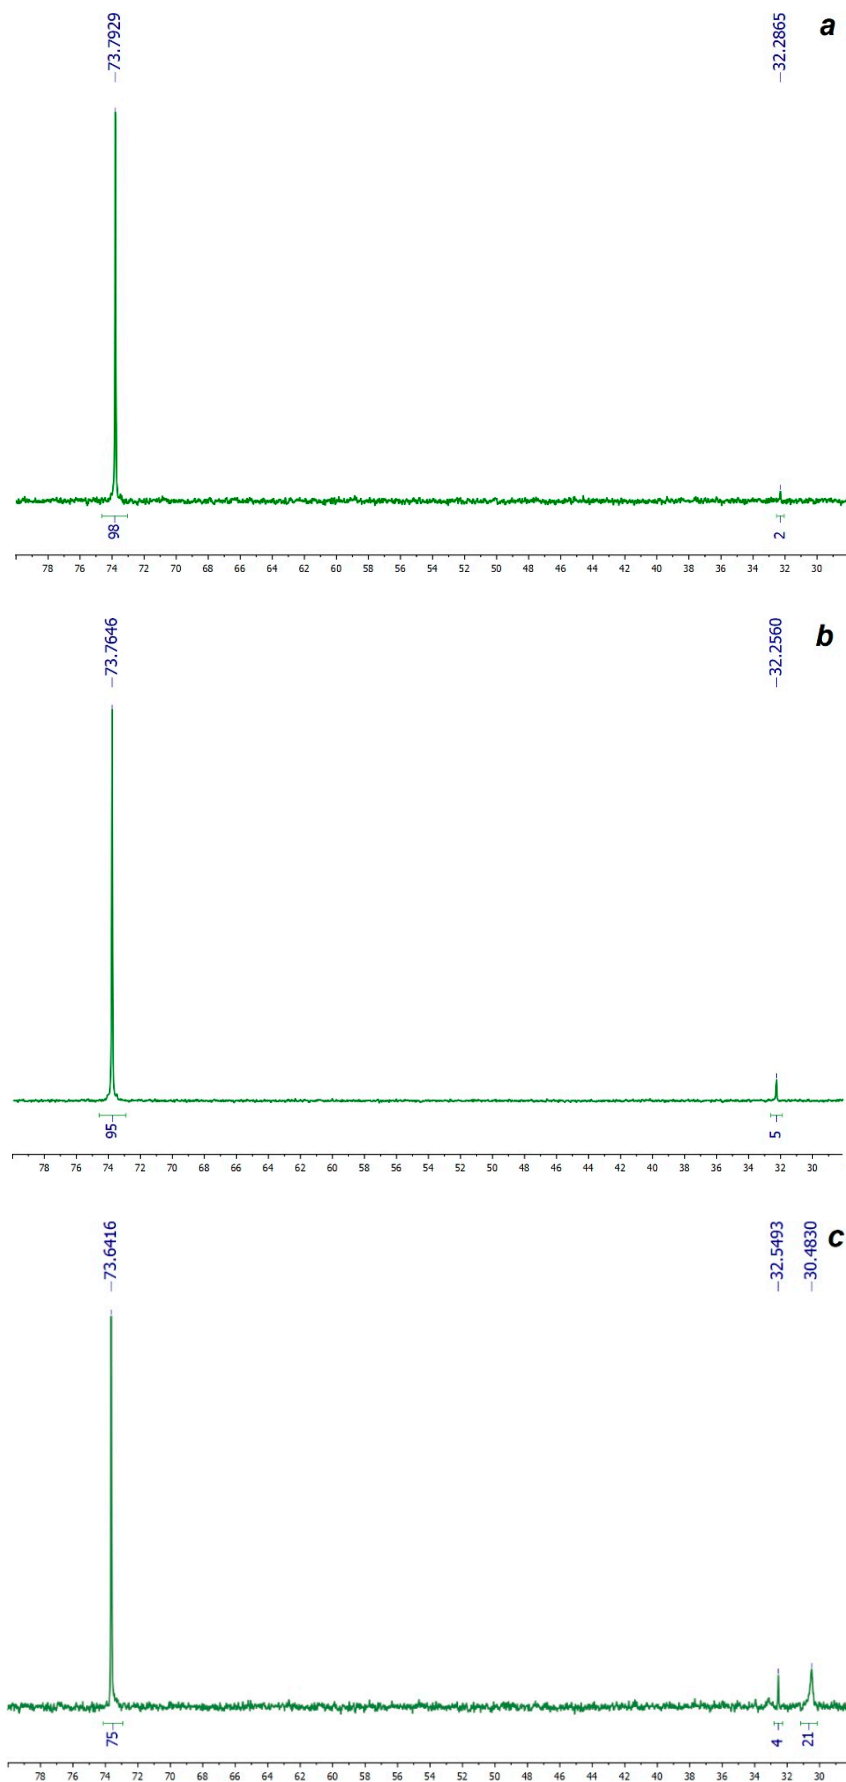

**Figure. S49.**  $^{31}\text{P}\{^1\text{H}\}$  NMR spectra of complex **3b** in  $\text{CDCl}_3$ – $(\text{CD}_3)_2\text{SO}$  registered in 1 h (*a*), 8 h (*b*), and 1 week (*c*) after dissolution

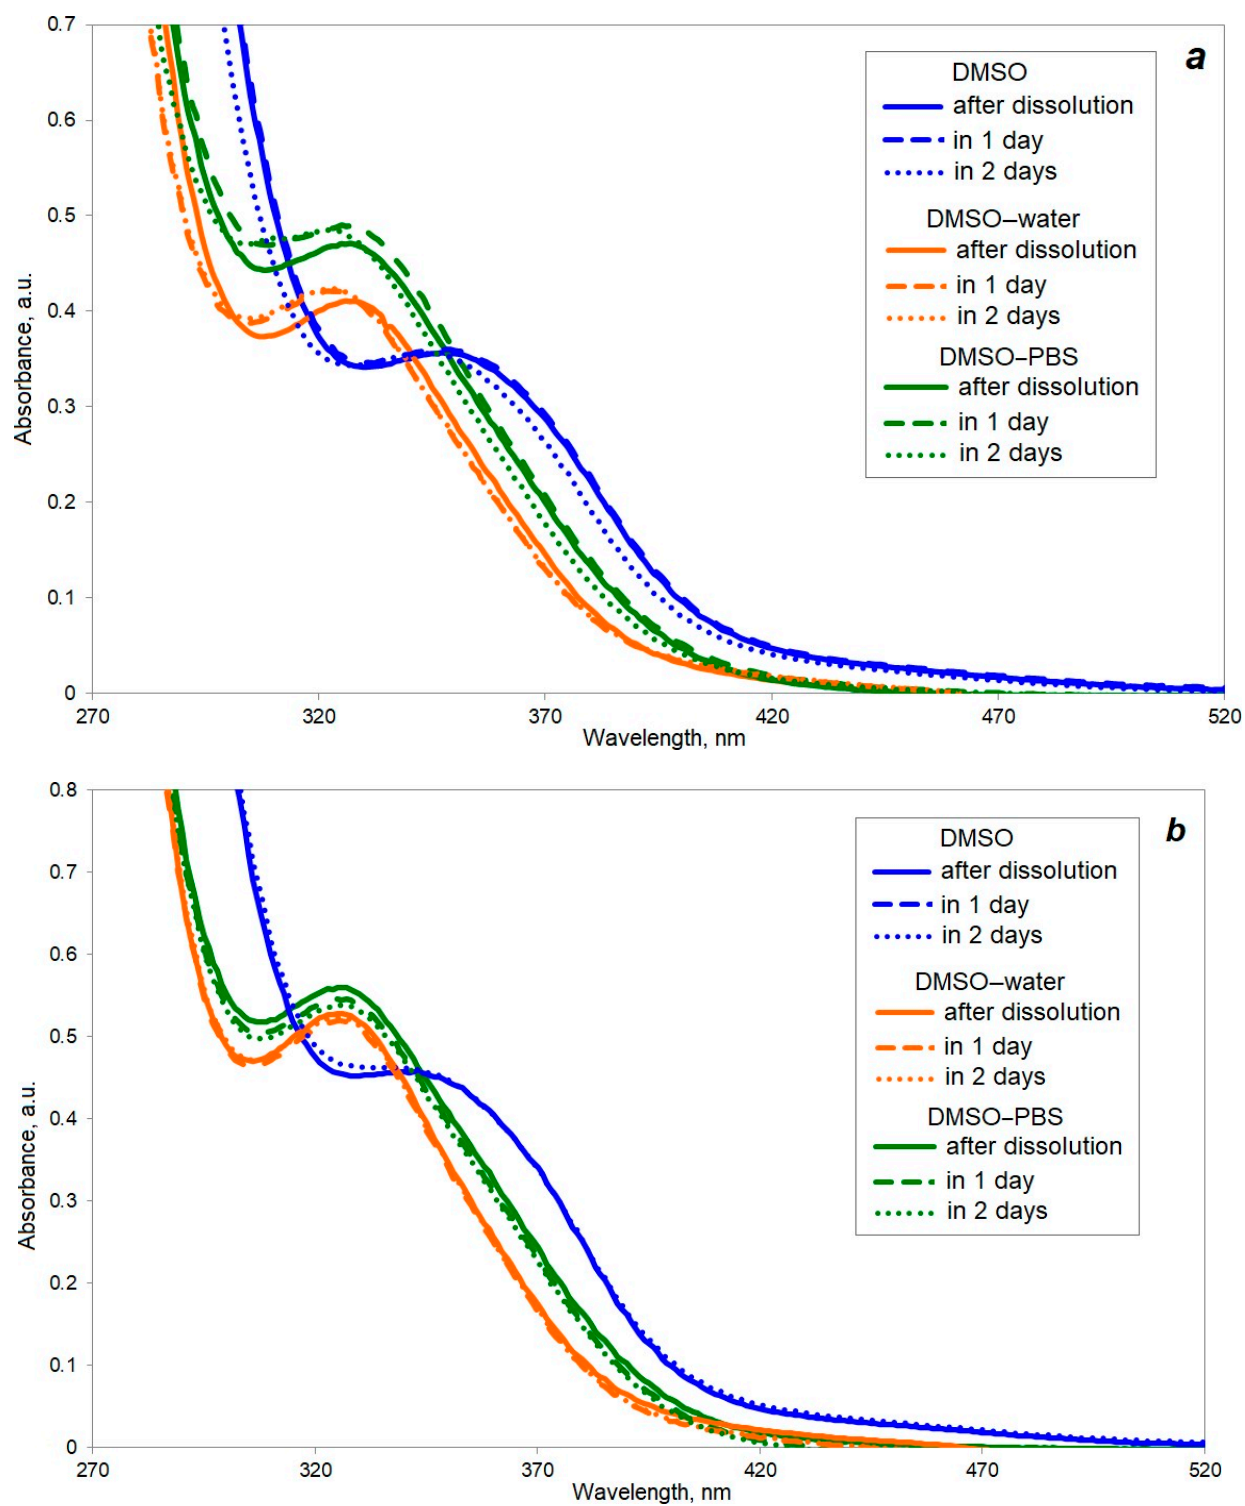

**Figure. S50.** UV-vis spectra of complexes **2a** (a) and **3a** (b) in DMSO, DMSO–deionized water (1:1), and DMSO–PBS (1:1) registered immediately after dissolution, in one or two days



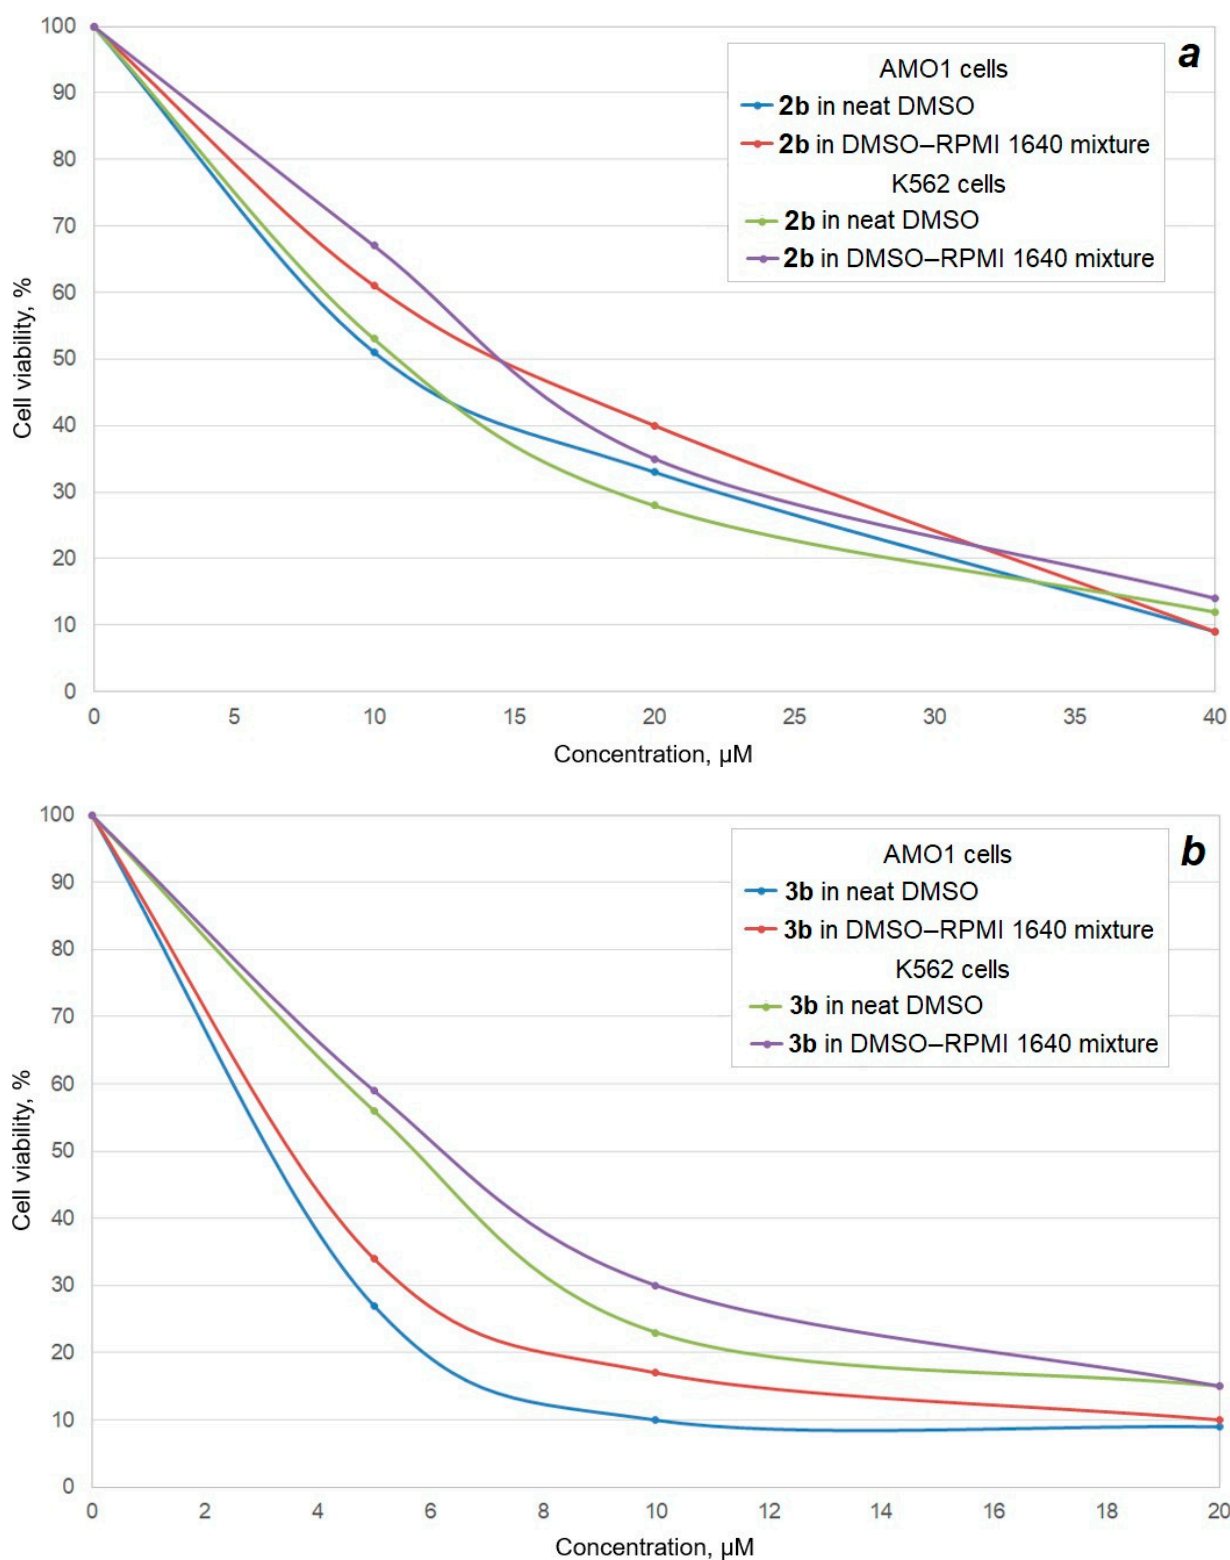

**Figure S51.** Effect of complexes **2b** (a) and **3b** (b) dissolved either in neat DMSO or DMSO–RPMI 1640 mixture on AMO1 and K562 cells (cell viability was defined by the conventional MTT assay according to the methodology described in the Experimental section with slight modifications: the complexes explored were preliminarily kept in neat DMSO or DMSO–RPMI 1640 mixture for 2 days before the experiments and the following incubation period was 72 h)

**Table S1.** Selected bond lengths (Å) and angles (°) for complexes 5 and 7.

|                      |            |            |            |
|----------------------|------------|------------|------------|
| <b>5</b>             |            |            |            |
| Pd1–Cl1              | 2.3063(13) | C10–N2     | 1.331(5)   |
| Pd1–O2               | 2.084(3)   | Cl1–Pd1–N2 | 171.72(10) |
| Pd1–N1               | 2.038(3)   | O2–Pd1–N1  | 166.40(11) |
| Pd1–N2               | 1.971(3)   | N1–Pd1–N2  | 80.92(13)  |
| P1–O2                | 1.523(3)   | N2–Pd1–O2  | 85.66(12)  |
| N1–C1                | 1.339(5)   | O2–Pd1–Cl1 | 90.57(8)   |
| C1–C10               | 1.509(5)   | Cl1–Pd1–N1 | 102.44(10) |
| C10–O1               | 1.240(5)   |            |            |
| <b>7<sup>a</sup></b> |            |            |            |
| Pd1–Cl1              | 2.3317(17) | C10–O1     | 1.253(9)   |
| Pd1–O2               | 2.058(5)   | C10–N2     | 1.343(9)   |
| Pd1–N1               | 1.995(6)   | Cl1–Pd1–N2 | 171.24(16) |
| Pd1–N2               | 2.006(6)   | O2–Pd1–N1  | 177.9(2)   |
| P1–O2                | 1.530(5)   | N1–Pd1–N2  | 91.0(2)    |
| N1–C9                | 1.386(9)   | N2–Pd1–O2  | 88.4(2)    |
| C9–C1                | 1.425(10)  | O2–Pd1–Cl1 | 86.27(14)  |
| C1–C10               | 1.515(9)   | Cl1–Pd1–N1 | 94.57(17)  |

<sup>a</sup> the geometric parameters of two symmetry-independent molecules are very close; here are the selected bond lengths and angles for the molecule presented in Figure 4.

**Table S2.** Crystal data and structure refinement parameters for compounds **1b**, **2a**, **2b**, **3b**, **5**, and **7**

| Complex                                                                | <b>1b</b>                                                      | <b>2a</b>                                                                      | <b>2b</b>                                                                                  | <b>3b</b>                                                          | <b>5</b>                                                                       | <b>7</b>                                                                                               |
|------------------------------------------------------------------------|----------------------------------------------------------------|--------------------------------------------------------------------------------|--------------------------------------------------------------------------------------------|--------------------------------------------------------------------|--------------------------------------------------------------------------------|--------------------------------------------------------------------------------------------------------|
| Empirical formula                                                      | <b>C<sub>25</sub>H<sub>21</sub>N<sub>2</sub>O<sub>2</sub>P</b> | <b>C<sub>25</sub>H<sub>32</sub>Cl<sub>2</sub>N<sub>3</sub>O<sub>2</sub>PPd</b> | <b>C<sub>63</sub>H<sub>73</sub>Cl<sub>7</sub>N<sub>6</sub>O<sub>4</sub>P<sub>2</sub>Pd</b> | <b>C<sub>25</sub>H<sub>20</sub>ClN<sub>2</sub>O<sub>2</sub>PPd</b> | <b>C<sub>30</sub>H<sub>24</sub>Cl<sub>3</sub>N<sub>2</sub>O<sub>2</sub>PPd</b> | <b>C<sub>47</sub>H<sub>37</sub>Cl<sub>5</sub>N<sub>4</sub>O<sub>4</sub>P<sub>2</sub>Pd<sub>2</sub></b> |
| Formula weight                                                         | 412.21                                                         | 614.80                                                                         | 1501.16                                                                                    | 553.25                                                             | 688.23                                                                         | 1173.79                                                                                                |
| T, K                                                                   | 120                                                            | 120                                                                            | 120                                                                                        | 120                                                                | 120                                                                            | 120                                                                                                    |
| Crystal system                                                         | Triclinic                                                      | Monoclinic                                                                     | Monoclinic                                                                                 | Monoclinic                                                         | Triclinic                                                                      | Triclinic                                                                                              |
| Space group                                                            | P $\bar{1}$                                                    | P2 <sub>1</sub> /c                                                             | P2 <sub>1</sub> /c                                                                         | P2 <sub>1</sub> /c                                                 | P $\bar{1}$                                                                    | P $\bar{1}$                                                                                            |
| Z                                                                      | 2                                                              | 4                                                                              | 2                                                                                          | 4                                                                  | 2                                                                              | 2                                                                                                      |
| a, Å                                                                   | 9.8201(9)                                                      | 16.9979(10)                                                                    | 9.7726(15)                                                                                 | 11.7717(16)                                                        | 9.6402(19)                                                                     | 10.6639(14)                                                                                            |
| b, Å                                                                   | 9.8338(9)                                                      | 9.1189(6)                                                                      | 35.668(5)                                                                                  | 11.9075(3)                                                         | 11.978(2)                                                                      | 13.0578(17)                                                                                            |
| c, Å                                                                   | 11.9476(10)                                                    | 18.8822(12)                                                                    | 10.2456(15)                                                                                | 17.389(5)                                                          | 13.418(3)                                                                      | 17.630(2)                                                                                              |
| $\alpha$ , °                                                           | 100.591(2)                                                     | 90                                                                             | 90                                                                                         | 90                                                                 | 74.73(3)                                                                       | 89.676(3)                                                                                              |
| $\beta$ , °                                                            | 108.278(2)                                                     | 115.7740(10)                                                                   | 113.674(2)                                                                                 | 109.346(7)                                                         | 72.94(3)                                                                       | 73.550(3)                                                                                              |
| $\gamma$ , °                                                           | 102.041(2)                                                     | 90                                                                             | 90                                                                                         | 90                                                                 | 78.15(3)                                                                       | 72.491(2)                                                                                              |
| V, Å <sup>3</sup>                                                      | 1032.14(16)                                                    | 2635.6(3)                                                                      | 3270.8(8)                                                                                  | 2299.9(7)                                                          | 1415.1(6)                                                                      | 2236.8(5)                                                                                              |
| D <sub>calc</sub> (g cm <sup>-3</sup> )                                | 1.327                                                          | 1.549                                                                          | 1.524                                                                                      | 1.598                                                              | 1.615                                                                          | 1.743                                                                                                  |
| $\mu$ , cm <sup>-1</sup>                                               | 1.58                                                           | 9.95                                                                           | 9.36                                                                                       | 10.18                                                              | 10.27                                                                          | 12.25                                                                                                  |
| F(000)                                                                 | 432                                                            | 1256                                                                           | 1532                                                                                       | 1112                                                               | 692                                                                            | 1172                                                                                                   |
| 2 $\theta$ <sub>max</sub> , °                                          | 58                                                             | 56                                                                             | 54                                                                                         | 54                                                                 | 58                                                                             | 54                                                                                                     |
| Reflections measured                                                   | 21542                                                          | 28994                                                                          | 21319                                                                                      | 8078                                                               | 7510                                                                           | 9682                                                                                                   |
| Independent reflections                                                | 5495                                                           | 6352                                                                           | 7123                                                                                       | 4232                                                               | 7510                                                                           | 9682                                                                                                   |
| Observed reflections<br>[I > 2 $\sigma$ (I)]                           | 4480                                                           | 5154                                                                           | 5037                                                                                       | 3433                                                               | 6652                                                                           | 8437                                                                                                   |
| Parameters                                                             | 271                                                            | 310                                                                            | 394                                                                                        | 289                                                                | 353                                                                            | 578                                                                                                    |
| R1                                                                     | 0.0445                                                         | 0.0319                                                                         | 0.0901                                                                                     | 0.0314                                                             | 0.0451                                                                         | 0.0568                                                                                                 |
| wR2                                                                    | 0.1225                                                         | 0.0688                                                                         | 0.1638                                                                                     | 0.0755                                                             | 0.1011                                                                         | 0.1974                                                                                                 |
| GOF                                                                    | 1.037                                                          | 1.021                                                                          | 1.227                                                                                      | 1.012                                                              | 1.058                                                                          | 1.077                                                                                                  |
| $\Delta\rho_{\text{max}}/\Delta\rho_{\text{min}}$ (e Å <sup>-3</sup> ) | 0.548/−0.248                                                   | 0.469/−0.775                                                                   | 1.322/−1.163                                                                               | 0.517/−0.367                                                       | 0.716/−1.078                                                                   | 3.931/−1.930                                                                                           |
| CCDC                                                                   | 2242547                                                        | 2242548                                                                        | 2242549                                                                                    | 2242550                                                            | 2242552                                                                        | 2242554                                                                                                |
